# Supplementary material for: Enantioselective transformation of Na2SO3into allylic sulfonic acids under Pd catalysis
Source: Royal Society of Chemistry journal article supplement (doi:10.1039/c4cc06945e), 2014-11-19
Supplement: c4cc06945e1.pdf [file c4cc06945e1.pdf]

# Supporting Information

## Enantioselective Transformation of Na<sub>2</sub>SO<sub>3</sub> into Allylic Sulfonic Acids under Pd catalysis

Wei Liu, Xiaoming Zhao\*, Hongbo Zhang, Liang Zhang

*Department of Chemistry, State Key Laboratory of Pollution Control and Resource Reuse, Tongji University,  
1239 Siping Lu, Shanghai, P. R. China, 200092*

*xmzhao08@mail.tongji.edu.cn*

### Contents

|                                                                                                      |    |
|------------------------------------------------------------------------------------------------------|----|
| General Experimental Details.....                                                                    | 2  |
| General Procedure for Pd-catalyzed Allylic Sulfonations of the Symmetrical Allylic Acetates<br>..... | 2  |
| Characterization Data .....                                                                          | 3  |
| NMR Spectra .....                                                                                    | 11 |
| HPLC Chromatograms .....                                                                             | 52 |

## General Experimental Details

All manipulations were carried out under an argon atmosphere using standard Schlenk techniques. All glassware was oven or flame dried immediately prior to use. All solvents were purified and dried according to standard methods prior to use, unless stated otherwise.

All reagents were obtained from commercial sources and used without further purification.  $^1\text{H}$  NMR spectra were obtained at 400 MHz and recorded relative to the tetramethylsilane signal (0 ppm) or residual protio-solvent (3.31 ppm for  $\text{CD}_3\text{OD}$ ; 7.26 ppm for  $\text{CDCl}_3$ ).  $^{13}\text{C}$  NMR spectra were obtained at 100 MHz, and chemical shifts were recorded relative to the solvent resonance ( $\text{CD}_3\text{OD}$ , 49.00 ppm;  $\text{CDCl}_3$ , 77.0 ppm).  $^{19}\text{F}$  NMR spectra were obtained at 377 MHz and  $\text{CF}_3\text{COOH}$  ( $\delta = -76.55$ ) was used as internal standard. Data for NMR are recorded as follows: chemical shift ( $\delta$ , ppm), multiplicity (s = singlet, d = doublet, t = triplet, m = multiplet or unresolved, coupling constant(s) in Hz, integration).

## General Procedure for Pd-catalyzed Allylic Sulfonations of the Symmetrical Allylic

### Acetates

In a reaction tube equipped with a magnetic stirring bar were added in sequence allylic acetate **1** (1.0 mmol, 5 equiv.) and a mixture of THF (2.0 mL) and  $\text{H}_2\text{O}$  (0.5 mL) at room temperature under argon. To this solution were sequentially added catalyst made from  $\text{Pd}_2(\text{dba})_3$  (0.01 mmol, 5 mol%) and (*R*)-BINAP (0.02 mmol, 10 mol%) and sodium sulfite  $\text{Na}_2\text{SO}_3$  **2a** (0.20 mmol, 1 equiv.). The reaction was vigorously stirred at room temperature.

Work-up was performed through a plug of freshly activated acidic ion exchange resin.<sup>1</sup> The crude residue was purified by flash column chromatography (methanol/ethyl acetate) to give the desired products **3**.<sup>2</sup> The allylic sulfonic acid **3** (0.10 mmol) was added into the mixture of DCM (2.0 mL) and  $\text{HBF}_4$  (50% aq, 20  $\mu\text{L}$ ) at room temperature, and then trimethylsilyl diazomethane ( $\text{Me}_3\text{SiCHN}_2$ , 0.5 mmol, 0.5 mL) was added dropwise into the above-mentioned solution. The reaction mixture was stirred for 1 hour then the volatile solvent was removed under reduced pressure. The methylated sulfonic acids **3aa-3ja** was obtained by purifying the crude residue with column chromatography (petroleum ether/ethyl acetate).

Methanol- $d_4$  was chosen as an internal standard and the peak at 3.31 ppm is distributed to MeOD. The peak at 4.87 ppm is assigned to  $\text{H}_2\text{O}$ . After purification, there was a peak at 4.87 ppm for  $\text{H}_2\text{O}$  in  $^1\text{H}$  NMR spectra of the sulfonic acids due to the hygroscopic property of the sulfonic acids. The allylic sulfonic acids are difficult to be dried absolutely and this phenomena is in accord with previous works.<sup>2</sup> The yields of products were reduced the weight of water according the integration of  $\text{H}_2\text{O}$  in all cases.

## Reference

[1] F. Fini, M. Nagabelli, M. F. A. Adamo, *Adv. Synth. Catal.* 2010, **352**, 3163.

[2] The sulfonic acids **3** with water were obtained after purification, which are inseparable, see: (a) Moccia, M.; Fini, F.; Scagnetti, M.; Adamo, M. F. A. *Angew. Chem. Int. Ed.* 2011, **50**, 6893; b) Koch, F. M.; Peters, R. *Chem. -Eur. J.* 2011, **17**, 3679.

## Characterization Data

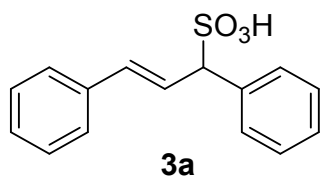

(*E*)-1,3-Diphenylprop-2-ene-1-sulfonic acid (**3a**)

The isolated hydrated sulfonic acid **3a** is 30.9 mg, which contains 2.4 mg of H<sub>2</sub>O. The integration of the hydrogen of H<sub>2</sub>O was determined as 2.19 by <sup>1</sup>H NMR at 4.87 ppm and the calculated yield was calculated by the following equations:

$$[\text{H}_2\text{O}] \% = ([\text{H}] * 18/2) / ([\text{H}] * 18/2 + \text{MW})$$

$$W[\text{H}_2\text{O}] = W * [\text{H}_2\text{O}] \%$$

$$\text{CW} = W - W[\text{H}_2\text{O}]$$

W = weight of the hydrated sulfonic acid

MW = molecular weight of the sulfonic acid

[H<sub>2</sub>O] % = the percent of water in the hydrated sulfonic acid

W[H<sub>2</sub>O] = weight of H<sub>2</sub>O

CW = calculated weight of the sulfonic acid

[H] = the integration of the hydrogen of H<sub>2</sub>O in <sup>1</sup>H NMR spectra.

For example, CW of **3a** was calculated by the following equations:

$$[\text{H}_2\text{O}] \% = 2.19 * 9 / (2.19 * 9 + 237) = 7.7 \%$$

$$W[\text{H}_2\text{O}] = 30.9 * 7.7 \% = 2.4 \text{ mg}$$

$$\text{CW} = 30.9 \text{ mg} - 2.4 \text{ mg} = 28.5 \text{ mg}$$

Calculated yield: 60% (28.5 mg). White solid. The sulfonic acid **3a** is hygroscopic<sup>[2]</sup> and is decomposed over 300 °C.

<sup>1</sup>H NMR (400 MHz, CD<sub>3</sub>OD) δ = 7.58 (d, *J* = 7.3 Hz, 2H), 7.43 (d, *J* = 7.5 Hz, 2H), 7.37 (d, *J* = 7.5 Hz, 2H), 7.32 (d, *J* = 7.2 Hz, 2H), 7.29 – 7.22 (m, 2H), 6.78 (dd, *J* = 15.8, 8.7 Hz, 1H), 6.62 (d, *J* = 15.8 Hz, 1H), 4.82 (d, *J* = 8.6 Hz, 1H).

<sup>13</sup>C NMR (100 MHz, CD<sub>3</sub>OD) δ = 138.61, 138.31, 135.38, 130.52, 130.44, 129.56, 129.30, 129.13, 128.71, 128.56, 127.49, 126.86, 71.38.

HRMS (ESI) found: 237.0597, C<sub>15</sub>H<sub>13</sub>O<sub>3</sub>S [M-H]<sup>-</sup> requires: 237.0591.

Enantiomeric excess was determined with the sulfonic acid methyl ester generated by esterification of **3a** with Me<sub>3</sub>SiCHN<sub>2</sub> and analyzed by HPLC (254 nm, 25 °C) on a chiral stationary phase [(Daicel CHIRALPAK AD, 0.46 cm × 25 cm). t<sub>R</sub> = 19.06 min (major); 22.02 min (minor); hexane/2-propanol = 80/20, 1.0 mL/min] to be 90%. [α]<sub>20</sub><sup>D</sup> = -13.5° (c 1.0, MeOH).

IR (KBr): ν max (cm<sup>-1</sup>) = 3480, 2960, 2913, 2852, 1633, 1511, 1489, 1396, 1357, 1169, 1089, 1070, 984, 775, 587, 510, 453.

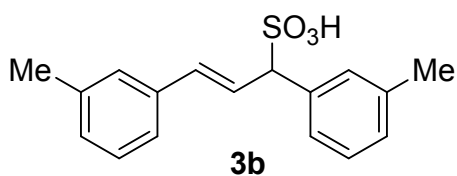

**(E)-1,3-Di-m-tolylprop-2-ene-1-sulfonic acid (3b)**

The isolated hydrated sulfonic acid **3b** is 31.5 mg, which contains 0.8 mg of H<sub>2</sub>O (the integration of the hydrogen of H<sub>2</sub>O was determined as 0.89 by <sup>1</sup>H NMR at 4.87 ppm). Calculated yield by the same method as shown in **3a**: 51% (30.7 mg). White solid. The sulfonic acid **3b** is hygroscopic<sup>[2]</sup> and is decomposed over 300 °C.

<sup>1</sup>H NMR (400 MHz, CD<sub>3</sub>OD) δ = 7.29 – 7.24 (m, 2H), 7.13 – 7.01 (m, 4H), 6.97 (d, *J* = 7.5 Hz, 1H), 6.89 (d, *J* = 7.2 Hz, 1H), 6.62 (dd, *J* = 15.8, 8.7 Hz, 1H), 6.44 (d, *J* = 15.8 Hz, 1H), 4.68 (d, *J* = 8.7 Hz, 1H), 2.21 (s, 3H), 2.16 (s, 3H).

<sup>13</sup>C NMR (100 MHz, CD<sub>3</sub>OD) δ = 139.09, 138.87, 138.27, 138.09, 135.44, 131.01, 129.39, 129.22, 129.17, 128.06, 127.47, 126.44, 124.62, 71.27, 21.51, 21.38.

HRMS (ESI) found: 301.0891, C<sub>17</sub>H<sub>17</sub>O<sub>3</sub>S [M-H]<sup>-</sup> requires: 301.0904.

Enantiomeric excess was determined with the sulfonic acid methyl ester generated by esterification of **3b** with Me<sub>3</sub>SiCHN<sub>2</sub> and analyzed by HPLC (254 nm, 25 °C) on a chiral stationary phase [(Daicel CHIRALPAK AD, 0.46 cm × 25 cm). t<sub>R</sub> = 12.56 min (major); 14.68 min (minor); hexane/2-propanol = 70/30, 1.0 mL/min] to be 83%. [α]<sub>20</sub><sup>D</sup> = -14.0° (c 1.0, MeOH).

IR (KBr): ν max (cm<sup>-1</sup>) = 3493, 2978, 2958, 2851, 1625, 1502, 1474, 1387, 1351, 1160, 1081, 1065, 974, 763, 597, 525, 441.

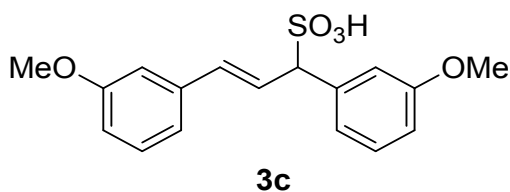

**(E)-1,3-Bis(3-methoxyphenyl)prop-2-ene-1-sulfonic acid (3c)**

The isolated hydrated sulfonic acid **3c** is 46.3 mg, which contains 1.0 mg of H<sub>2</sub>O (the integration of the hydrogen of H<sub>2</sub>O was determined as 0.80 by <sup>1</sup>H NMR at 4.87 ppm). Calculated yield by the same method as shown in **3a**: 68% (45.3 mg).

White solid. The sulfonic acid **3c** is hygroscopic<sup>[2]</sup> and is decomposed over 300 °C.

<sup>1</sup>H NMR (400 MHz, CD<sub>3</sub>OD) δ = 7.26 – 7.12 (m, 4H), 7.04 – 6.97 (m, 2H), 6.86 (d, *J* = 8.2 Hz, 1H), 6.80 (d, *J* = 8.1 Hz, 1H), 6.73 (dd, *J* = 15.7, 8.6 Hz, 1H), 6.59 (d, *J* = 15.8 Hz, 1H), 4.78 (d, *J* = 8.6 Hz, 1H), 3.82 (s, 3H), 3.79 (s, 3H).

<sup>13</sup>C NMR (100 MHz, CD<sub>3</sub>OD) δ = 161.31, 161.01, 139.90, 139.69, 135.33, 130.52, 130.26, 127.07, 122.78, 120.11, 116.15, 114.47, 114.06, 112.70, 71.25, 55.69, 55.63.

HRMS (ESI) found: 333.0808, C<sub>17</sub>H<sub>17</sub>O<sub>5</sub>S [M-H]<sup>-</sup> requires: 333.0802.

Enantiomeric excess was determined with the sulfonic acid methyl ester generated by esterification of **3c** with Me<sub>3</sub>SiCHN<sub>2</sub> and analyzed by HPLC (254 nm, 25 °C) on a chiral stationary phase [(Daicel CHIRALPAK AD, 0.46 cm × 25 cm). t<sub>R</sub> = 21.91 min (major); 24.10 min (minor); hexane/2-propanol = 70/30, 1.0 mL/min] to be 91%. [α]<sub>20</sub><sup>D</sup> = -15.9° (c 1.1, MeOH).

IR (KBr): ν max (cm<sup>-1</sup>) = 3486, 3450, 2980, 2923, 2868, 1645, 1578, 1441, 1385, 1352, 1162, 1087, 1067, 963, 752, 578, 528, 468.

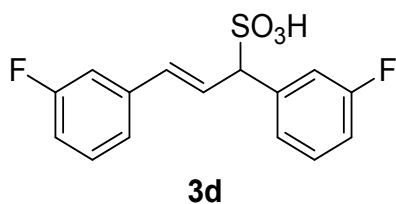

*(E)*-1,3-Bis(3-fluorophenyl)prop-2-ene-1-sulfonic acid (**3d**)

The isolated hydrated sulfonic acid **3d** is 34.0 mg, which contains 1.2 mg of H<sub>2</sub>O (the integration of the hydrogen of H<sub>2</sub>O was determined as 1.3 by <sup>1</sup>H NMR at 4.87 ppm). Calculated yield by the same method as shown in **3a**: 53% (32.8 mg).

White solid. The sulfonic acid **3d** is hygroscopic<sup>[2]</sup> and is decomposed over 300 °C.

<sup>1</sup>H NMR (400 MHz, CD<sub>3</sub>OD) δ = 7.34 – 7.14 (m, 6H), 7.10 – 6.91 (m, 2H), 6.78 (dd, *J* = 15.8, 8.9 Hz, 1H), 6.63 (d, *J* = 16.0 Hz, 1H), 4.82 (d, *J* = 8.7 Hz, 1H).

<sup>13</sup>C NMR (100 MHz, CD<sub>3</sub>OD) δ = 165.45 (d, *J* = 47.3 Hz), 163.03 (d, *J* = 46.9 Hz), 134.28 (d, *J* = 2.2 Hz), 131.25 (d, *J* = 8.4 Hz), 130.86 (d, *J* = 8.3 Hz), 130.44 (d, *J* = 8.5 Hz), 129.03 (s), 128.35 (s), 126.34 (d, *J* = 2.6 Hz), 123.58 (d, *J* = 2.4 Hz), 117.00 (d, *J* = 22.5 Hz), 115.31 (d, *J* = 10.8 Hz), 115.10 (d, *J* = 10.4 Hz), 113.72 (d, *J* = 22.1 Hz), 70.65 (s).

<sup>19</sup>F NMR (377 MHz, MeOD) δ = -115.52, -115.69.

HRMS (ESI) found: 309.0407, C<sub>15</sub>H<sub>11</sub>F<sub>2</sub>O<sub>3</sub>S [M-H]<sup>-</sup> requires: 309.0402.

Enantiomeric excess was determined with the sulfonic acid methyl ester generated by esterification of **3d** with Me<sub>3</sub>SiCHN<sub>2</sub> and analyzed by HPLC (254 nm, 25 °C) on a chiral stationary phase [(Daicel CHIRALPAK AD, 0.46 cm × 25 cm). t<sub>R</sub> = 11.49 min (minor); 13.36 min (major); hexane/2-propanol = 70/30, 1.0 mL/min] to be 85%. [α]<sub>20</sub><sup>D</sup> = -14.2° (c 0.9, MeOH).

IR (KBr): ν max (cm<sup>-1</sup>) = 3495, 2971, 2925, 2868, 1689, 1544, 1475, 1386, 1341, 1156, 1025, 1010, 956, 796, 575, 569, 457.

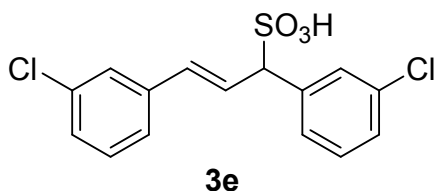

*(E)*-1,3-Bis(3-chlorophenyl)prop-2-ene-1-sulfonic acid (**3e**)

The isolated hydrated sulfonic acid **3e** is 42.8 mg, which contains 1.3 mg of H<sub>2</sub>O (the integration of the hydrogen of H<sub>2</sub>O was determined as 1.22 by <sup>1</sup>H NMR at 4.87 ppm). Calculated yield by the same method as shown in **3a**: 61% (41.5 mg).

White solid. The sulfonic acid **3e** is hygroscopic<sup>[2]</sup> and is decomposed over 300 °C.

<sup>1</sup>H NMR (400 MHz, CD<sub>3</sub>OD) δ = 7.58 (d, *J* = 7.3 Hz, 2H), 7.43 (d, *J* = 7.5 Hz, 2H), 7.37 (d, *J* = 7.5 Hz, 2H), 7.32 (d, *J* = 7.2 Hz, 2H), 7.29 – 7.22 (m, 2H), 6.78 (dd, *J* = 15.8, 8.7 Hz, 1H), 6.62 (d, *J* = 15.8 Hz, 1H), 4.82 (d, *J* = 8.6 Hz, 1H).

<sup>13</sup>C NMR (100 MHz, CD<sub>3</sub>OD) δ = 140.71, 140.22, 135.51, 135.00, 134.33, 131.06, 130.80, 130.53, 130.34, 129.10, 128.88, 128.64, 128.61, 128.09, 127.35, 125.90, 70.49.

HRMS (ESI) found: 340.9814, C<sub>15</sub>H<sub>11</sub>Cl<sub>2</sub>O<sub>3</sub>S [M-H]<sup>-</sup> requires: 340.9811.

Enantiomeric excess was determined with the sulfonic acid methyl ester generated by esterification of **3e** with Me<sub>3</sub>SiCHN<sub>2</sub> and analyzed by HPLC (254 nm, 25 °C) on a chiral stationary phase [(Daicel CHIRALPAK AD, 0.46 cm × 25 cm). t<sub>R</sub> = 12.67 min (minor); 15.46 min (major); hexane/2-propanol = 70/30, 1.0 mL/min] to be 81%. [α]<sub>20</sub><sup>D</sup> = -15.3° (c 1.0, MeOH). IR (KBr): ν max (cm<sup>-1</sup>) = 3489, 2986, 2942, 2874, 1656, 1529, 1480, 1342, 1311, 1109, 1056, 1014, 963, 761, 556, 512, 482.

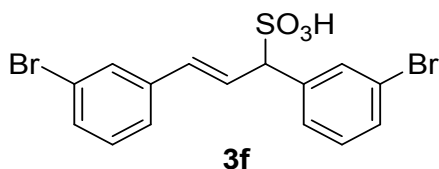

*(E)*-1,3-Bis(3-bromophenyl)prop-2-ene-1-sulfonic acid (**3f**)

The isolated hydrated sulfonic acid **3f** is 47.0 mg, which contains 0.7 mg of H<sub>2</sub>O (integration of the hydrogen of H<sub>2</sub>O was determined as 0.70 by <sup>1</sup>H NMR at 4.87 ppm). Calculated yield by the same method as shown in **3a**: 54% (46.3 mg).

White solid. The sulfonic acid **3f** is hygroscopic<sup>[2]</sup> and is decomposed over 300 °C.

<sup>1</sup>H NMR (400 MHz, CD<sub>3</sub>OD) δ = 7.65 (s, 1H), 7.46 – 7.38 (m, 2H), 7.31 (d, *J* = 8.0 Hz, 1H), 7.24 – 7.17 (m, 2H), 7.17 – 7.11 (m, 1H), 7.07 – 7.00 (m, 1H), 6.61 (dd, *J* = 15.8, 8.8 Hz, 1H), 6.44 (d, *J* = 15.8 Hz, 1H), 4.74 (d, *J* = 8.7 Hz, 1H).

<sup>13</sup>C NMR (100 MHz, CD<sub>3</sub>OD) δ = 140.69, 140.23, 134.34, 133.20, 131.63, 131.56, 131.26, 131.08, 130.25, 129.26, 127.75, 126.24, 123.52, 123.05, 70.28.

HRMS (ESI) found: 428.8800, C<sub>15</sub>H<sub>11</sub>Br<sub>2</sub>O<sub>3</sub>S [M-H]<sup>-</sup> requires: 428.8801.

Enantiomeric excess was determined with the sulfonic acid methyl ester generated by esterification of **3f** with Me<sub>3</sub>SiCHN<sub>2</sub> and analyzed by HPLC (254 nm, 25 °C) on a chiral stationary phase [(Daicel CHIRALPAK AD, 0.46 cm × 25 cm). t<sub>R</sub> = 13.98 min (minor); 17.57 min (major); hexane/2-propanol = 70/30, 1.0 mL/min] to be 86%. [α]<sub>20</sub><sup>D</sup> = -15.7° (c 1.0, MeOH).

IR (KBr): ν max (cm<sup>-1</sup>) = 3452, 2963, 2922, 2888, 2802, 1683, 1602, 1522, 1475, 1348, 1316, 1108, 1012, 1027, 959, 729, 587, 509, 469.

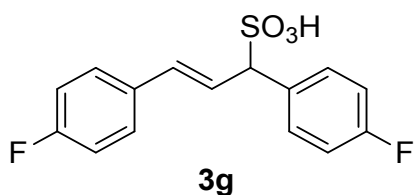

*(E)*-1,3-Bis(4-fluorophenyl)prop-2-ene-1-sulfonic acid (**3g**)

The isolated hydrated sulfonic acid **3g** is 38.9 mg, which contains 1.4 mg of H<sub>2</sub>O (the integration of the hydrogen of H<sub>2</sub>O was determined as 1.32 by <sup>1</sup>H NMR at 4.87 ppm). Calculated yield by the same method as shown in **3a**: 61% (37.5 mg).

White solid. The sulfonic acid **3g** is hygroscopic<sup>[2]</sup> and is decomposed over 300 °C.

<sup>1</sup>H NMR (400 MHz, CD<sub>3</sub>OD) δ = 7.60 (dd, *J* = 8.0, 5.6 Hz, 2H), 7.45 (dd, *J* = 8.1, 5.7 Hz, 2H), 7.14 – 7.06 (m, 2H), 7.06 – 6.99 (m, 2H), 6.70 (dd, *J* = 15.7, 8.3 Hz, 1H), 6.60 (d, *J* = 15.7 Hz, 1H).

$^{13}\text{C}$  NMR (100 MHz,  $\text{CD}_3\text{OD}$ )  $\delta$  = 164.89 (d,  $J$  = 9.6 Hz), 162.45 (d,  $J$  = 8.6 Hz), 134.69 (d,  $J$  = 3.1 Hz), 134.63 (d,  $J$  = 3.3 Hz), 134.16 (s), 132.21 (d,  $J$  = 8.1 Hz), 129.26 (d,  $J$  = 8.0 Hz), 126.67 (s), 116.23 (d,  $J$  = 21.8 Hz), 115.87 (d,  $J$  = 21.6 Hz), 70.28 (s).

$^{19}\text{F}$  NMR (377 MHz,  $\text{CD}_3\text{OD}$ )  $\delta$  = -116.21, -116.92.

HRMS (ESI) found: 309.0402,  $\text{C}_{15}\text{H}_{11}\text{F}_2\text{O}_3\text{S}$   $[\text{M}-\text{H}]^-$  requires: 309.0402.

Enantiomeric excess was determined with the sulfonic acid methyl ester generated by esterification of **3g** with  $\text{Me}_3\text{SiCHN}_2$  and analyzed by HPLC (254 nm, 25 °C) on a chiral stationary phase [(Daicel CHIRALPAK OD, 0.46 cm  $\times$  25 cm).  $t_{\text{R}}$  = 6.40 min (minor); 6.89 min (major); hexane/2-propanol = 70/30, 1.0 mL/min] to be 83%.  $[\alpha]_{20}^{\text{D}}$  = -13.4 ° (c 1.0, MeOH).

IR (KBr):  $\nu$  max ( $\text{cm}^{-1}$ ) = 3460, 2981, 2901, 2859, 1652, 1524, 1492, 1385, 1369, 1175, 1090, 1075, 996, 780, 590, 530, 456.

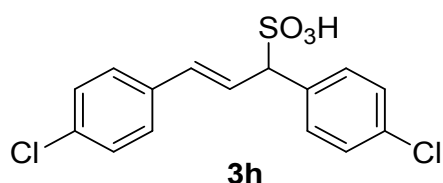

(*E*)-1,3-Bis(4-chlorophenyl)prop-2-ene-1-sulfonic acid (**3h**)

The isolated hydrated sulfonic acid **3h** is 38.5 mg, which contains 1.2 mg of  $\text{H}_2\text{O}$  (integration of the hydrogen of  $\text{H}_2\text{O}$  was determined as 1.21 by  $^1\text{H}$  NMR at 4.87 ppm). Calculated yield by the same method as shown in **3a**: 55% (37.3 mg).

White solid. The sulfonic acid **3h** is hygroscopic<sup>[2]</sup> and is decomposed over 300 °C.

$^1\text{H}$  NMR (400 MHz,  $\text{CD}_3\text{OD}$ )  $\delta$  = 7.57 (d,  $J$  = 8.1 Hz, 2H), 7.38 (d,  $J$  = 8.2 Hz, 2H), 7.34 (d,  $J$  = 8.1 Hz, 2H), 7.26 (d,  $J$  = 8.1 Hz, 2H), 6.76 (dd,  $J$  = 15.7, 8.6 Hz, 1H), 6.59 (d,  $J$  = 15.8 Hz, 1H), 4.88 (d,  $J$  = 8.6 Hz, 1H).

$^{13}\text{C}$  NMR (100 MHz,  $\text{CD}_3\text{OD}$ )  $\delta$  = 137.07, 136.74, 134.33, 134.23, 131.96, 129.55, 129.29, 128.91, 127.12, 70.22.

HRMS (ESI) found: 340.9811,  $\text{C}_{15}\text{H}_{11}\text{Cl}_2\text{O}_3\text{S}$   $[\text{M}-\text{H}]^-$  requires: 340.9811.

Enantiomeric excess was determined with the sulfonic acid methyl ester generated by esterification of **3h** with  $\text{Me}_3\text{SiCHN}_2$  and analyzed by HPLC (254 nm, 25 °C) on a chiral stationary phase [(Daicel CHIRALPAK AD, 0.46 cm  $\times$  25 cm).  $t_{\text{R}}$  = 20.00 min (major); 22.24 min (minor); hexane/2-propanol = 70/30, 1.0 mL/min] to be 87%.  $[\alpha]_{20}^{\text{D}}$  = -14.6° (c 1.0, MeOH).

IR (KBr):  $\nu$  max ( $\text{cm}^{-1}$ ) = 3501, 2963, 2927, 2845, 1670, 1569, 1432, 1352, 1359, 1174, 1092, 1085, 950, 763, 585, 532, 440.

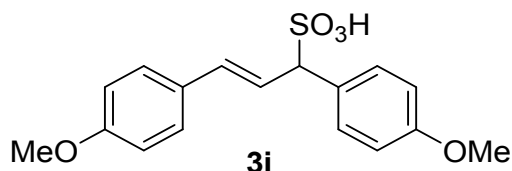

(*E*)-1,3-Bis(4-methoxyphenyl)prop-2-ene-1-sulfonic acid (**3i**)

The isolated hydrated sulfonic acid **3i** is 65.0 mg, which contains 3.7 mg of  $\text{H}_2\text{O}$  (the integration of the hydrogen of  $\text{H}_2\text{O}$  was determined as 2.25 by  $^1\text{H}$  NMR at 4.87 ppm). Calculated yield by the same method as shown in **3a**: 92% (61.3 mg).

White solid. The sulfonic acid **3i** is hygroscopic<sup>[2]</sup> and is decomposed over 300 °C.

$^1\text{H}$  NMR (400 MHz,  $\text{CD}_3\text{OD}$ )  $\delta$  = 7.48 (d,  $J$  = 8.7 Hz, 2H), 7.36 (d,  $J$  = 8.7 Hz, 2H), 6.91 (d,  $J$  = 8.6 Hz, 2H), 6.86 (d,  $J$  = 8.7 Hz, 2H), 6.60 (dd,  $J$  = 15.7, 8.0 Hz, 1H), 6.53 (d,  $J$  = 15.8 Hz, 1H), 4.74 (d,  $J$  = 8.0 Hz, 1H), 3.78 (s, 3H), 3.77 (s, 3H).

$^{13}\text{C}$  NMR (100 MHz,  $\text{CD}_3\text{OD}$ )  $\delta$  = 160.85, 160.61, 134.73, 131.50, 131.08, 130.65, 128.71, 124.59, 114.96, 114.70, 70.73.

HRMS (ESI) found: 333.0799,  $\text{C}_{17}\text{H}_{17}\text{O}_5\text{S}$   $[\text{M}-\text{H}]^-$  requires: 333.0802.

Enantiomeric excess was determined with the sulfonic acid **3i** and analyzed by HPLC (267 nm, 25 °C) on a chiral stationary phase [(Daicel CHIRALPAK IB, 0.46×25 cm, 5  $\mu\text{m}$ ).  $t_{\text{R}}$  = 17.62 min (major); 26.42 min (minor); hexane/2-propanol/diethyl amine = 50/50/0.2, 0.7 mL/min] to be 98%.  $[\alpha]_{20}^{\text{D}}$  = -10.8° (c 1.0, MeOH).

IR (KBr):  $\nu$  max ( $\text{cm}^{-1}$ ) = 3510, 2996, 2905, 2849, 1626, 1505, 1493, 1382, 1369, 1189, 1050, 1010, 970, 785, 575, 520, 442.

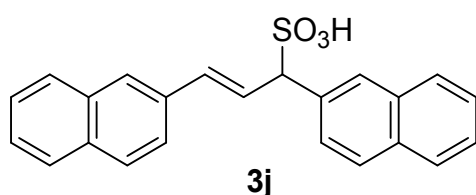

(*E*)-1,3-Di(naphthalen-2-yl)prop-2-ene-1-sulfonic acid (**3j**)

The isolated hydrated sulfonic acid **3j** is 31.1 mg, which contains 1.1 mg of  $\text{H}_2\text{O}$  (the integration of the hydrogen of  $\text{H}_2\text{O}$  was determined as 1.51 by  $^1\text{H}$ NMR at 4.87 ppm). Calculated yield by the same method as shown in **3a** : 40% (30.0 mg).

White solid. The sulfonic acid **3j** is hygroscopic<sup>[2]</sup> and is decomposed over 300 °C.

$^1\text{H}$  NMR (400 MHz,  $\text{CD}_3\text{OD}$ )  $\delta$  = 8.06 (s, 1H), 7.87 – 7.79 (m, 3H), 7.75 – 7.71 (m, 3H), 7.67 (d,  $J$  = 8.6 Hz, 1H), 7.48 – 7.42 (m, 2H), 7.41 – 7.36 (m, 3H), 7.24 (d,  $J$  = 7.5 Hz, 1H), 7.03 (dd,  $J$  = 15.8, 8.7 Hz, 1H), 6.80 (d,  $J$  = 15.9 Hz, 1H), 5.08 (d,  $J$  = 8.6 Hz, 1H).

$^{13}\text{C}$  NMR (100 MHz,  $\text{CD}_3\text{OD}$ )  $\delta$  = 136.11, 135.74, 135.65, 134.99, 134.82, 134.48, 134.32, 130.53, 129.55, 129.16, 129.01, 128.79, 128.58, 128.55, 128.36, 127.55, 127.28, 127.24, 127.03, 126.97, 126.93, 124.58, 71.57.

HRMS (ESI) found: 373.0917,  $\text{C}_{23}\text{H}_{17}\text{O}_3\text{S}$   $[\text{M}-\text{H}]^-$  requires: 373.0904.

Enantiomeric excess was determined with the sulfonic acid methyl ester generated by esterification of **3j** with  $\text{Me}_3\text{SiCHN}_2$  and analyzed by HPLC (254 nm, 25 °C) on a chiral stationary phase [(Daicel CHIRALPAK OD, 0.46 cm × 25 cm).  $t_{\text{R}}$  = 31.28 min (minor); 38.62 min (major); hexane/2-propanol = 90/10, 1.0 mL/min] to be 87%.  $[\alpha]_{20}^{\text{D}}$  = -11.5° (c 0.9, MeOH).

IR (KBr):  $\nu$  max ( $\text{cm}^{-1}$ ) = 3475, 2997, 2956, 2810, 2755, 1652, 1506, 1475, 1380, 1342, 1175, 1093, 1052, 974, 769, 574, 532, 442.

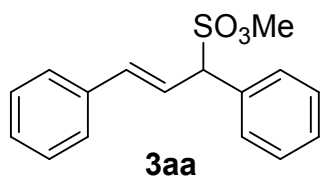

(*E*)-Methyl 1,3-diphenylprop-2-ene-1-sulfonate (**3aa**)



Yield: 45%, 15.0 mg. White solid. Melting point: 118-119 °C.

$^1\text{H}$  NMR (400 MHz,  $\text{CDCl}_3$ )  $\delta$  = 7.61 – 7.54 (m, 2H), 7.50 – 7.40 (m, 5H), 7.39 – 7.30 (m, 3H), 6.79 (d,  $J$  = 15.8 Hz, 1H), 6.63 (dd,  $J$  = 15.7, 8.8 Hz, 1H), 5.09 (d,  $J$  = 8.8 Hz, 1H), 3.77 (s, 3H).

$^{13}\text{C}$  NMR (100 MHz,  $\text{CDCl}_3$ )  $\delta$  = 137.50, 135.59, 132.57, 129.32, 129.22, 129.06, 128.70, 126.86, 120.48, 70.81, 57.53.

HRMS (ESI) found: 311.0707,  $\text{C}_{16}\text{H}_{16}\text{O}_3\text{SNa}$  [ $\text{M}+\text{Na}$ ] $^+$  requires: 311.0712.

IR (KBr):  $\nu$  max ( $\text{cm}^{-1}$ ) = 3460, 2982, 2978, 2810, 2715, 1650, 1515, 1463, 1392, 1322, 1155, 1096, 1014, 961, 779, 563, 512, 478.

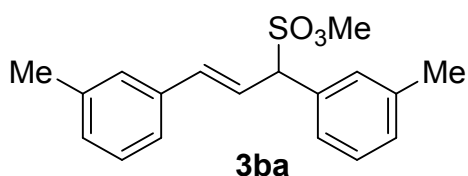

(*E*)-Methyl 1,3-di-*m*-tolylprop-2-ene-1-sulfonate (**3ba**)

Yield: 42%, 12.8 mg. White solid. Melting point: 124-125 °C.

$^1\text{H}$  NMR (400 MHz,  $\text{CDCl}_3$ )  $\delta$  = 7.37 – 7.27 (m, 3H), 7.26 – 7.16 (m, 4H), 7.13 – 7.04 (m, 1H), 6.71 (d,  $J$  = 15.7 Hz, 1H), 6.58 (dd,  $J$  = 15.6, 8.9 Hz, 1H), 5.02 (d,  $J$  = 8.8 Hz, 1H), 3.75 (s, 3H), 2.38 (s, 3H), 2.33 (s, 3H).

$^{13}\text{C}$  NMR (100 MHz,  $\text{CDCl}_3$ )  $\delta$  = 138.88, 138.35, 137.50, 135.61, 132.53, 130.03, 129.92, 129.50, 128.96, 128.63, 127.48, 126.40, 124.17, 120.45, 70.84, 57.65, 21.50, 21.39.

HRMS (ESI) found: 339.1025,  $\text{C}_{18}\text{H}_{20}\text{O}_3\text{SNa}$  [ $\text{M}+\text{Na}$ ] $^+$  requires: 339.1025.

IR (KBr):  $\nu$  max ( $\text{cm}^{-1}$ ) = 3347, 2913, 1547, 1526, 1505, 1473, 1406, 1372, 1170, 1178, 1049, 806, 659, 676, 618, 600, 495.

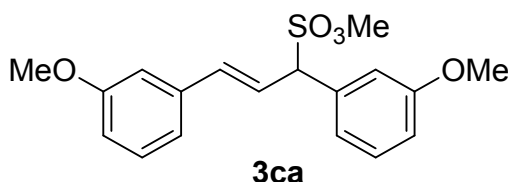

(*E*)-Methyl 1,3-bis(3-methoxyphenyl)prop-2-ene-1-sulfonate (**3ca**)

Yield: 48%, 16.7 mg. White solid. Melting point: 153-154 °C.

$^1\text{H}$  NMR (400 MHz,  $\text{CDCl}_3$ )  $\delta$  = 7.37 (t,  $J$  = 8.0 Hz, 1H), 7.29 (t,  $J$  = 3.9 Hz, 1H), 7.14 (d,  $J$  = 7.7 Hz, 1H), 7.11 (s, 1H), 7.04 (d,  $J$  = 7.7 Hz, 1H), 6.96 (d,  $J$  = 6.4 Hz, 2H), 6.87 (dd,  $J$  = 8.2, 1.9 Hz, 1H), 6.75 (d,  $J$  = 15.7 Hz, 1H), 6.59 (dd,  $J$  = 15.7, 8.8 Hz, 1H), 5.04 (d,  $J$  = 8.8 Hz, 1H), 3.86 (s, 3H), 3.85 (s, 3H), 3.80 (s, 3H).

$^{13}\text{C}$  NMR (100 MHz,  $\text{CDCl}_3$ )  $\delta$  = 159.96, 159.88, 137.41, 136.99, 133.89, 130.08, 129.71, 121.56, 120.77, 119.57, 115.09, 114.61, 114.43, 112.11, 70.72, 55.39, 55.33.

HRMS (ESI) found: 371.0916,  $\text{C}_{18}\text{H}_{20}\text{O}_5\text{SNa}$  [ $\text{M}+\text{Na}$ ] $^+$  requires: 371.0924.

IR (KBr):  $\nu$  max ( $\text{cm}^{-1}$ ) = 3510, 2969, 2930, 2847, 1601, 1556, 1478, 1312, 1300, 1156, 1089, 1020, 960, 785, 563, 520, 463.

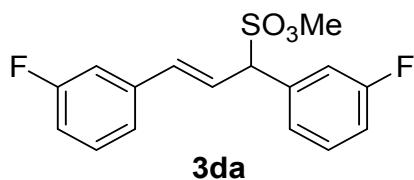

(E)-Methyl 1,3-bis(3-fluorophenyl)prop-2-ene-1-sulfonate (**3da**)

Yield: 50%, 16.2 mg. White solid. Melting point: 107-108 °C.

<sup>1</sup>H NMR (400 MHz, CDCl<sub>3</sub>) δ = 7.47 – 7.39 (m, 1H), 7.38 – 7.28 (m, 3H), 7.21 (d, *J* = 7.8 Hz, 1H), 7.13 (dd, *J* = 13.1, 5.5 Hz, 2H), 7.05 – 6.99 (m, 1H), 6.76 (d, *J* = 15.7 Hz, 1H), 6.58 (dd, *J* = 15.7, 8.8 Hz, 1H), 5.08 (d, *J* = 8.8 Hz, 1H), 3.83 (s, 3H).

<sup>13</sup>C NMR (100 MHz, CDCl<sub>3</sub>) δ = 164.18 (d, *J* = 19.8 Hz), 161.72 (d, *J* = 21.4 Hz), 137.64 (d, *J* = 7.7 Hz), 136.74 (d, *J* = 2.6 Hz), 134.59 (d, *J* = 7.5 Hz), 130.71 (d, *J* = 8.2 Hz), 130.30 (d, *J* = 8.3 Hz), 125.08 (d, *J* = 3.1 Hz), 122.83 (d, *J* = 2.8 Hz), 121.39 (s), 116.50 (d, *J* = 4.0 Hz), 116.28 (d, *J* = 5.9 Hz), 115.72 (d, *J* = 21.3 Hz), 113.41 (d, *J* = 22.1 Hz), 69.88 (d, *J* = 1.7 Hz), 57.52 (s).

<sup>19</sup>F NMR (377 MHz, CDCl<sub>3</sub>) δ = -111.19, -112.84.

HRMS (ESI) found: 347.0530, C<sub>16</sub>H<sub>14</sub>F<sub>2</sub>O<sub>3</sub>SNa [M+Na]<sup>+</sup> requires: 347.0524.

IR (KBr): ν max (cm<sup>-1</sup>) = 3486, 2951, 2900, 2847, 1679, 1552, 1415, 1312, 1358, 1126, 1048, 1000, 923, 796, 585, 547, 452.

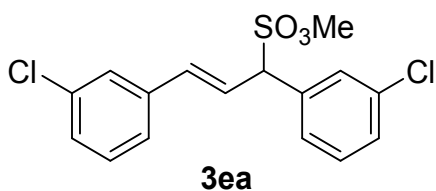

(E)-Methyl 1,3-bis(3-chlorophenyl)prop-2-ene-1-sulfonate (**3ea**)

Yield: 53%, 18.9 mg. White solid. Melting point: 127-128 °C.

<sup>1</sup>H NMR (400 MHz, CDCl<sub>3</sub>) δ = 7.55 (s, 1H), 7.49 – 7.39 (m, 4H), 7.37 – 7.29 (m, 3H), 6.72 (d, *J* = 15.8 Hz, 1H), 6.57 (dd, *J* = 15.7, 8.8 Hz, 1H), 5.03 (d, *J* = 8.7 Hz, 1H), 3.83 (s, 3H).

<sup>13</sup>C NMR (100 MHz, CDCl<sub>3</sub>) δ = 137.14, 136.59, 135.02, 134.81, 134.21, 130.37, 130.02, 129.58, 129.36, 128.85, 127.46, 126.79, 125.16, 121.42, 69.88, 57.49.

HRMS (ESI) found: 378.9937, C<sub>16</sub>H<sub>14</sub>Cl<sub>2</sub>O<sub>3</sub>SNa [M+Na]<sup>+</sup> requires: 378.9933.

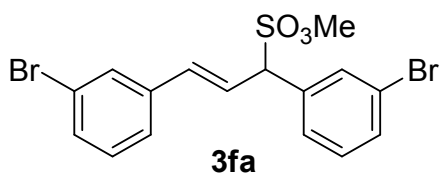

(E)-Methyl 1,3-bis(3-bromophenyl)prop-2-ene-1-sulfonate (**3fa**)

Yield: 46%, 20.5 mg. White solid. Melting point: 150-151 °C.

<sup>1</sup>H NMR (400 MHz, CDCl<sub>3</sub>) δ = 7.67 (s, 1H), 7.55 – 7.38 (m, 4H), 7.31 (t, *J* = 8.0 Hz, 2H), 7.21 (t, *J* = 7.8 Hz, 1H), 6.68 (d, *J* = 15.7 Hz, 1H), 6.53 (dd, *J* = 15.7, 8.8 Hz, 1H), 5.00 (d, *J* = 8.7 Hz, 1H), 3.80 (s, 3H).

<sup>13</sup>C NMR (100 MHz, CDCl<sub>3</sub>) δ = 137.40, 136.51, 134.46, 132.52, 132.21, 131.76, 130.66, 130.30, 129.69, 127.92, 125.64, 123.06, 122.94, 121.42, 69.78, 57.58.

HRMS (ESI) found: 466.8915, C<sub>16</sub>H<sub>14</sub>BrO<sub>3</sub>SNa [M+Na]<sup>+</sup> requires: 466.8923.

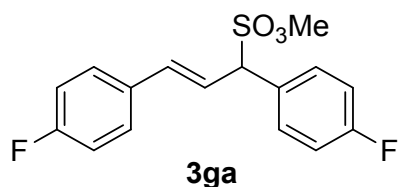

(*E*)-Methyl 1,3-bis(4-fluorophenyl)prop-2-ene-1-sulfonate (**3ga**)

Yield: 55%, 18.0 mg. White solid. Melting point: 125-126°C.

<sup>1</sup>H NMR (400 MHz, CDCl<sub>3</sub>) δ 7.52 (dd, *J* = 8.6, 5.2 Hz, 2H), 7.40 (dd, *J* = 8.5, 5.4 Hz, 2H), 7.17 – 7.09 (m, 2H), 7.06 – 7.00 (m, 2H), 6.71 (d, *J* = 15.7 Hz, 1H), 6.48 (dd, *J* = 15.7, 8.8 Hz, 1H), 5.04 (d, *J* = 8.8 Hz, 1H), 3.77 (s, 3H).

<sup>13</sup>C NMR (100 MHz, CDCl<sub>3</sub>) δ 164.32 (d, *J* = 16.2 Hz), 161.84 (d, *J* = 15.9 Hz), 136.49 (s), 131.64 (d, *J* = 3.3 Hz), 131.12 (d, *J* = 8.4 Hz), 128.57 (d, *J* = 8.2 Hz), 128.35 (d, *J* = 3.4 Hz), 119.93 (d, *J* = 2.1 Hz), 116.19 (d, *J* = 21.8 Hz), 115.78 (d, *J* = 21.8 Hz), 69.77 (s), 57.44 (s).

<sup>19</sup>F NMR (377 MHz, CDCl<sub>3</sub>) δ = -111.66, -112.25.

HRMS (ESI) found: 347.0518, C<sub>16</sub>H<sub>14</sub>F<sub>2</sub>O<sub>3</sub>SNa [M+Na]<sup>+</sup> requires: 347.0524.

IR (KBr): ν max (cm<sup>-1</sup>) = 3496, 2985, 2974, 2823, 1656, 1585, 1452, 1332, 1300, 1170, 1089, 1070, 910, 777, 559, 512, 427.

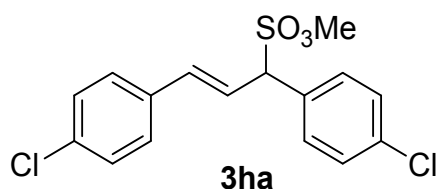

(*E*)-Methyl 1,3-bis(4-chlorophenyl)prop-2-ene-1-sulfonate (**3ha**)

Yield: 56%, 20.0 mg. White solid. Melting point: 128-129 °C.

<sup>1</sup>H NMR (400 MHz, CDCl<sub>3</sub>) δ = 7.51 – 7.43 (m, 4H), 7.40 – 7.37 (m, 1H), 7.37 – 7.33 (m, 3H), 6.72 (d, *J* = 15.8 Hz, 1H), 6.54 (dd, *J* = 15.7, 8.7 Hz, 1H), 5.05 (d, *J* = 8.7 Hz, 1H), 3.80 (s, 3H).

<sup>13</sup>C NMR (100 MHz, CDCl<sub>3</sub>) δ = 136.58, 135.48, 134.65, 133.87, 130.87, 130.80, 130.62, 129.56, 129.38, 129.25, 128.98, 128.10, 120.60, 69.81, 57.47.

HRMS (ESI) found: 378.9934, C<sub>16</sub>H<sub>14</sub>Cl<sub>2</sub>O<sub>3</sub>SNa [M+Na]<sup>+</sup> requires: 378.9933.

IR (KBr): ν max (cm<sup>-1</sup>) = 3461, 3061, 2963, 2843, 1895, 1692, 1596, 1492, 1403, 1356, 1163, 1095, 987, 846, 821, 781, 590, 529, 504, 443.

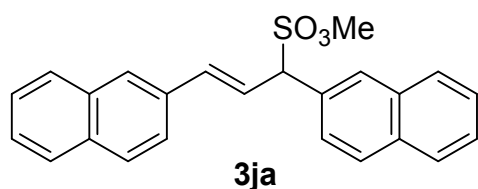

(*E*)-Methyl 1,3-di(naphthalen-2-yl)prop-2-ene-1-sulfonate (**3ja**)

Yield: 45%, 13.9 mg. White solid. Melting point: 164-165°C.

<sup>1</sup>H NMR (400 MHz, CDCl<sub>3</sub>) δ = 8.07 (s, 1H), 7.96 (d, *J* = 8.5 Hz, 1H), 7.94 – 7.87 (m, 2H), 7.86 – 7.79 (m, 4H), 7.73 (d, *J* = 8.6 Hz, 1H), 7.69 (d, *J* = 8.5 Hz, 1H), 7.57 (dd, *J* = 6.2, 3.2 Hz, 2H), 7.53 – 7.47 (m, 2H), 6.99 (d, *J* = 15.7 Hz, 1H), 6.86 (dd, *J* = 15.7, 8.5 Hz, 1H), 5.33 (d, *J* = 8.2 Hz, 1H), 3.80 (s, 3H).

$^{13}\text{C}$  NMR (100 MHz,  $\text{CDCl}_3$ )  $\delta$  = 137.74, 133.47, 133.42, 133.29, 133.07, 129.92, 129.14, 128.96, 128.49, 128.23, 128.17, 127.78, 127.73, 127.46, 126.98, 126.71, 126.53, 126.48, 126.29, 123.45, 120.78, 71.08, 57.60.

HRMS (ESI) found: 411.1025,  $\text{C}_{24}\text{H}_{20}\text{O}_3\text{SNa}$   $[\text{M}+\text{Na}]^+$  requires: 411.1025.

IR (KBr):  $\nu$  max ( $\text{cm}^{-1}$ ) = 3493, 2970, 2925, 2871, 1759, 1660, 1472, 1302, 1299, 1250, 1192, 1110, 989, 783, 570, 502, 463.

# NMR Spectra

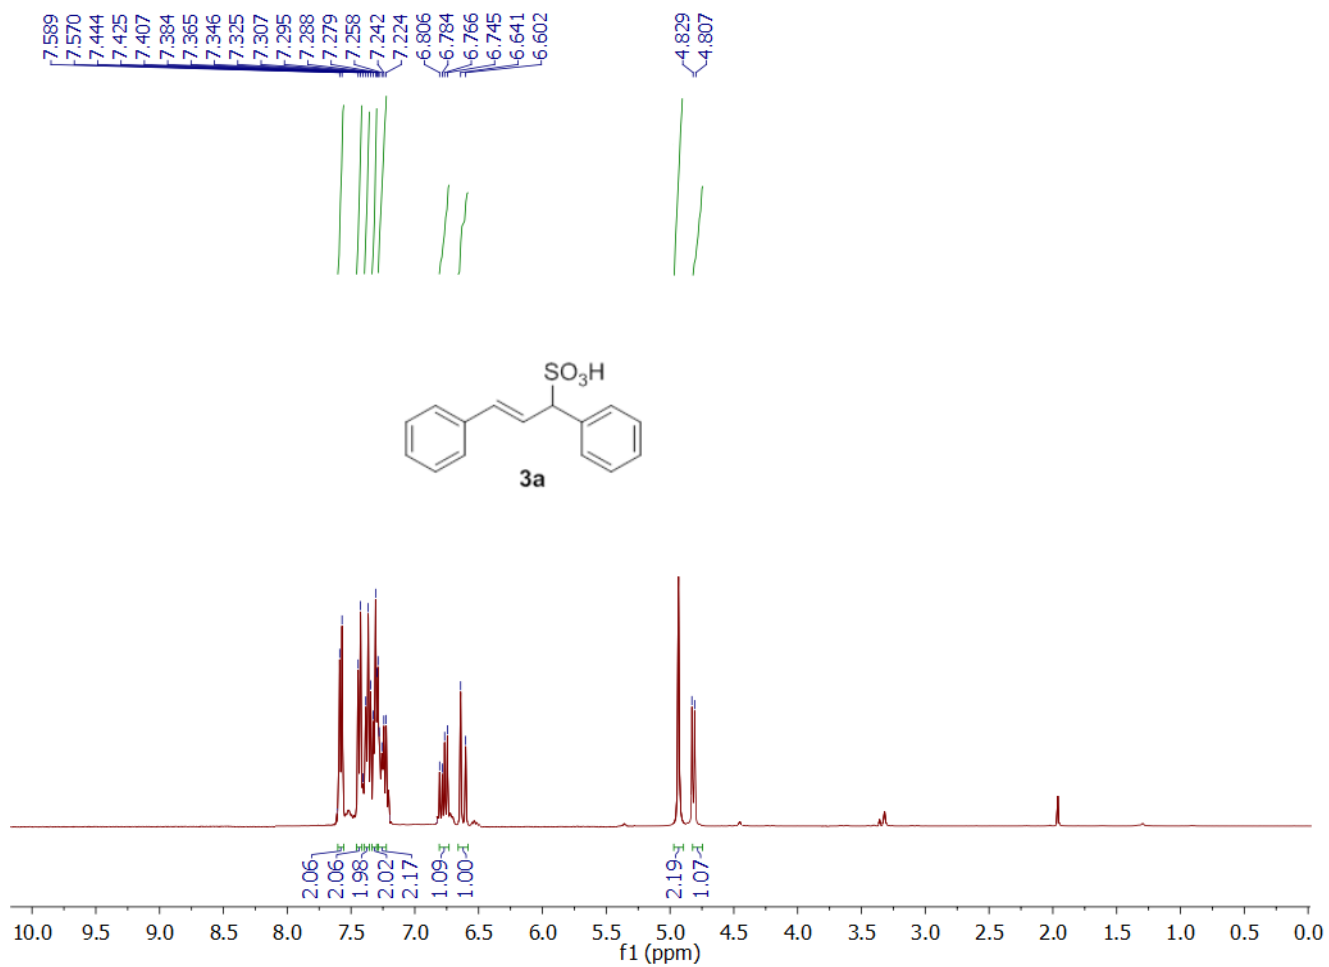

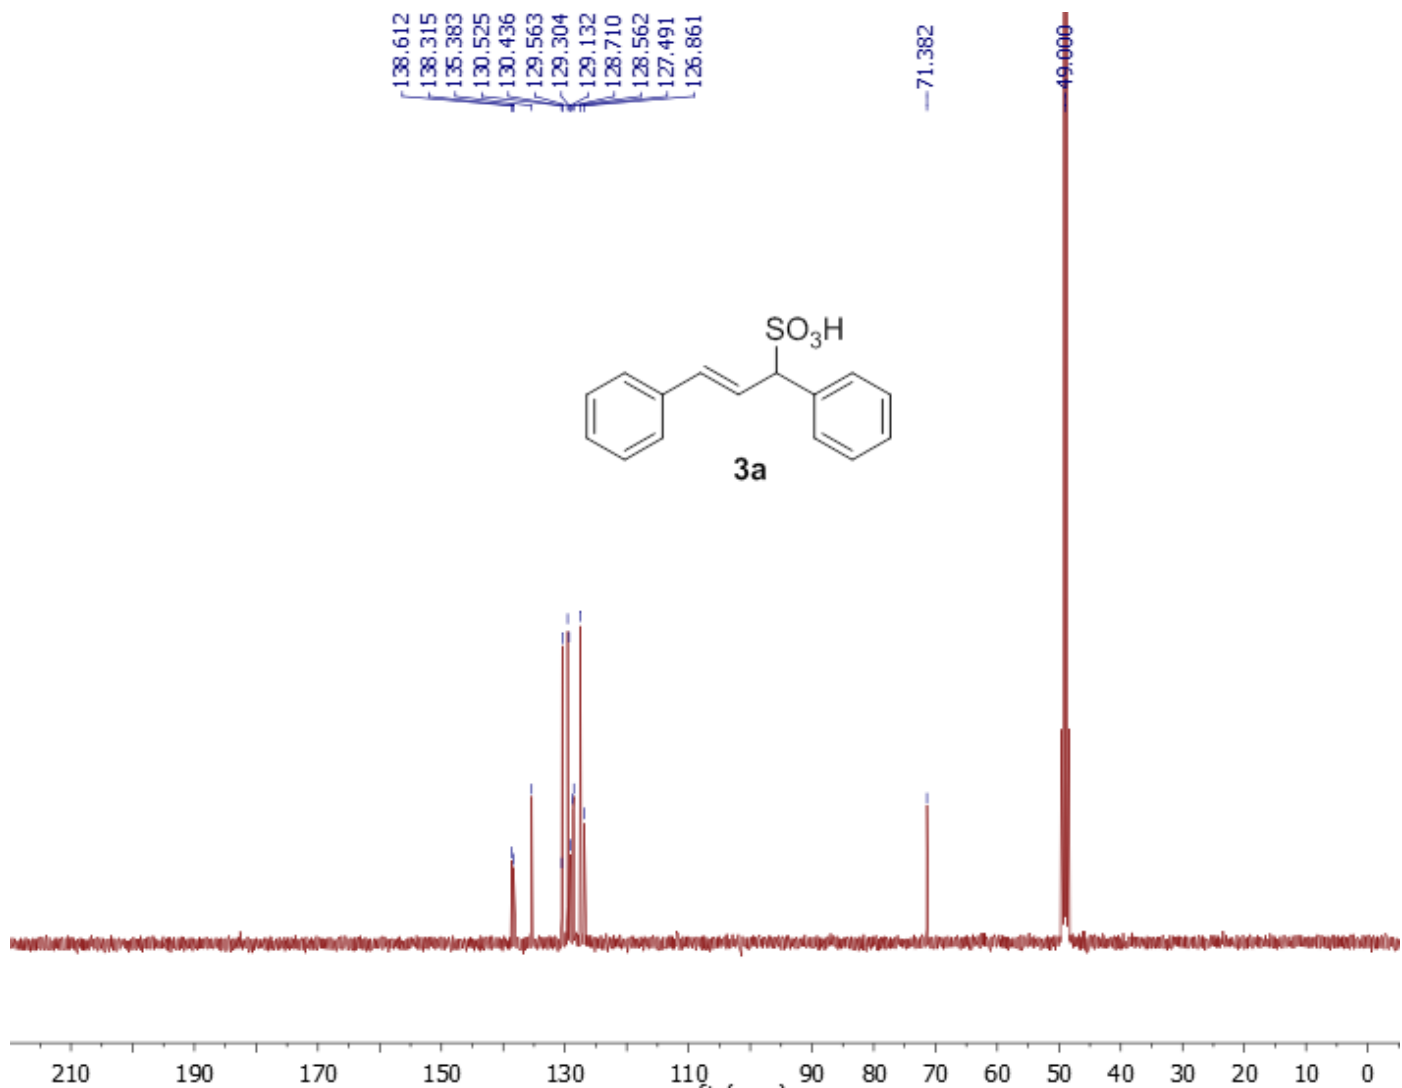

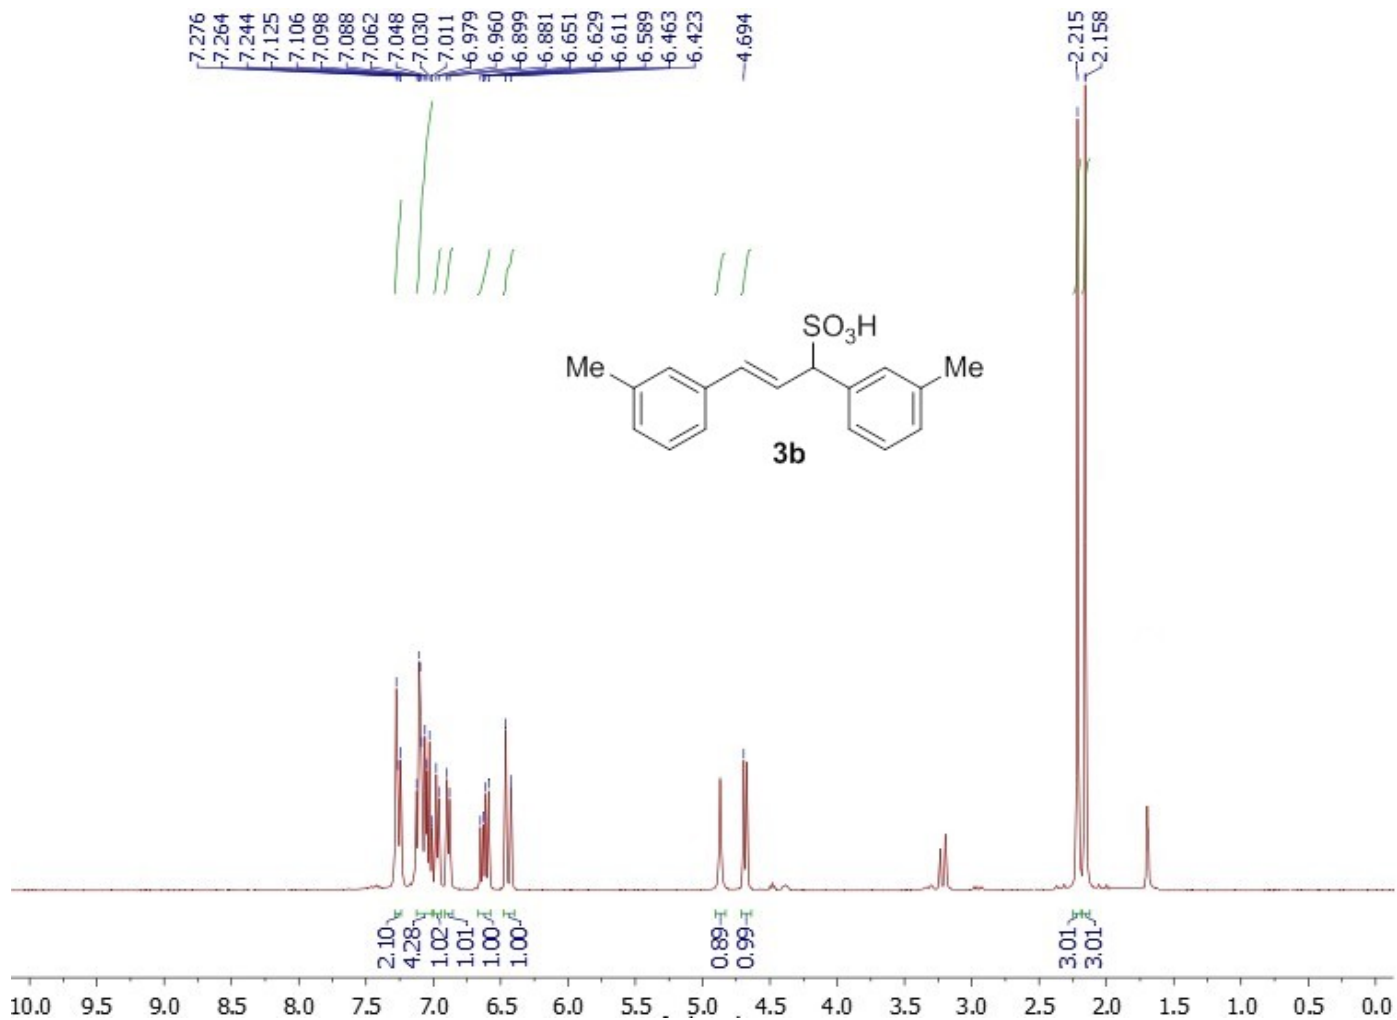

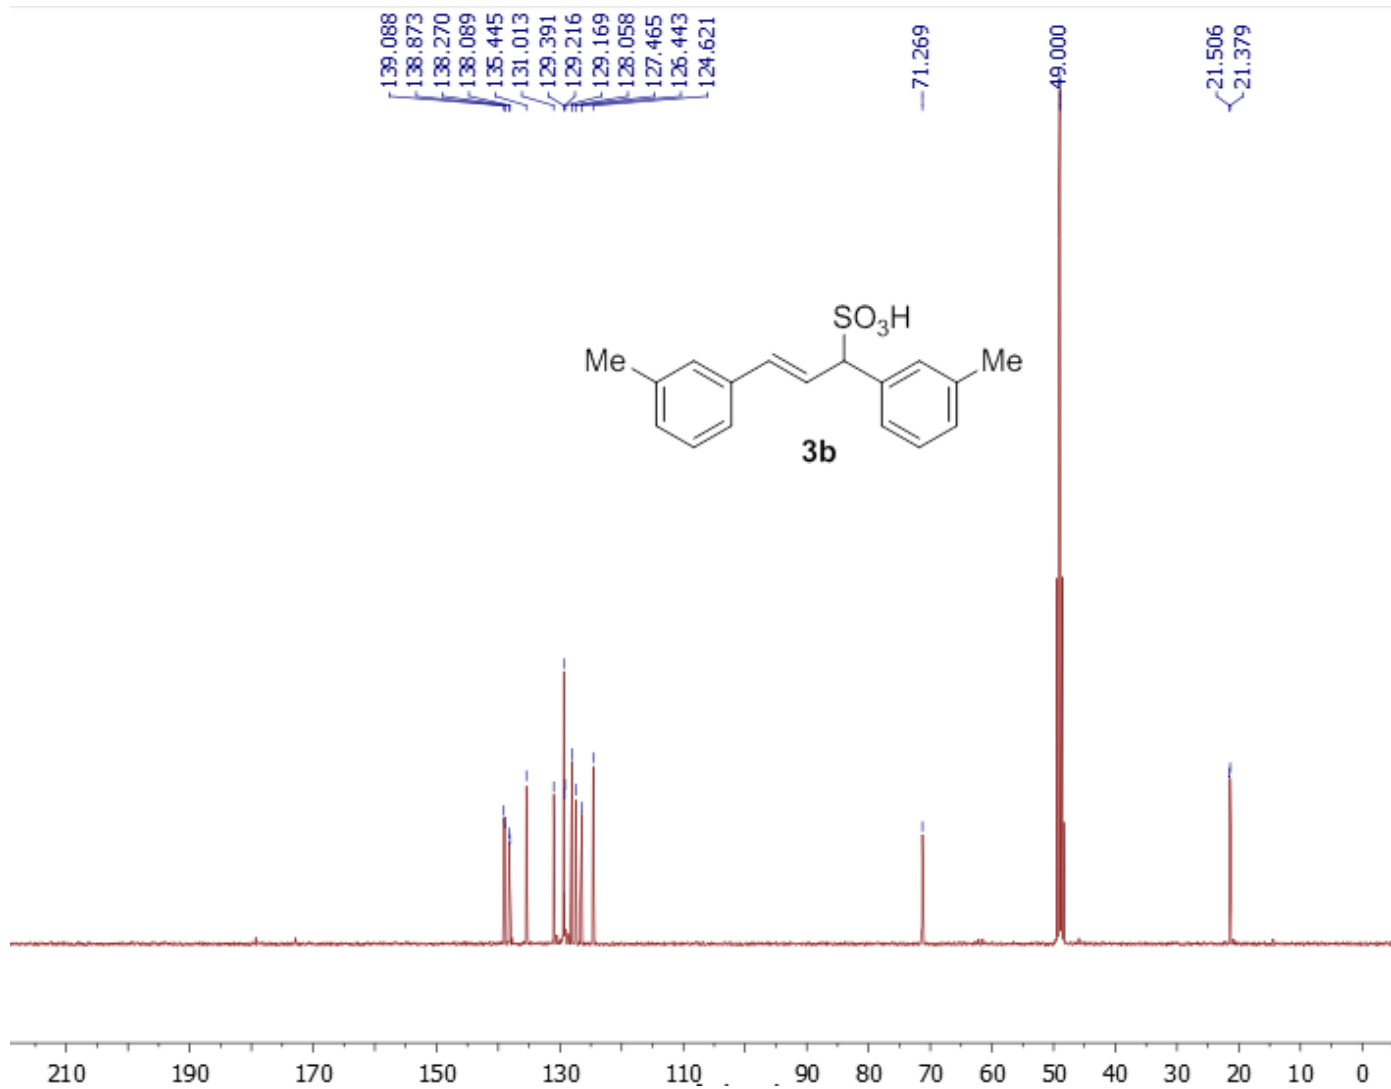



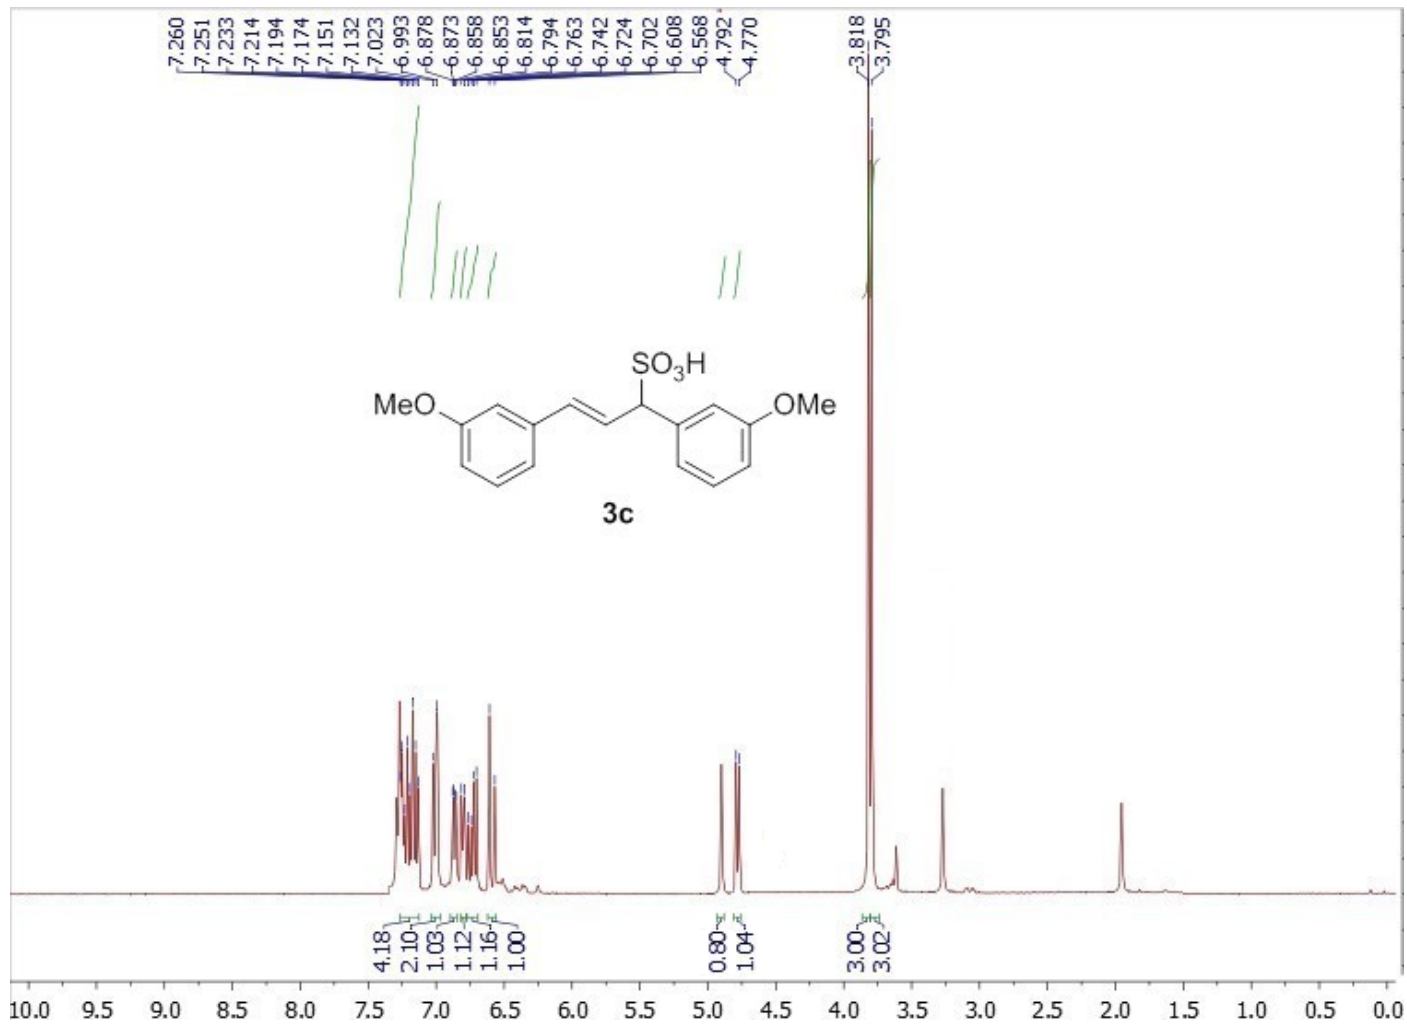

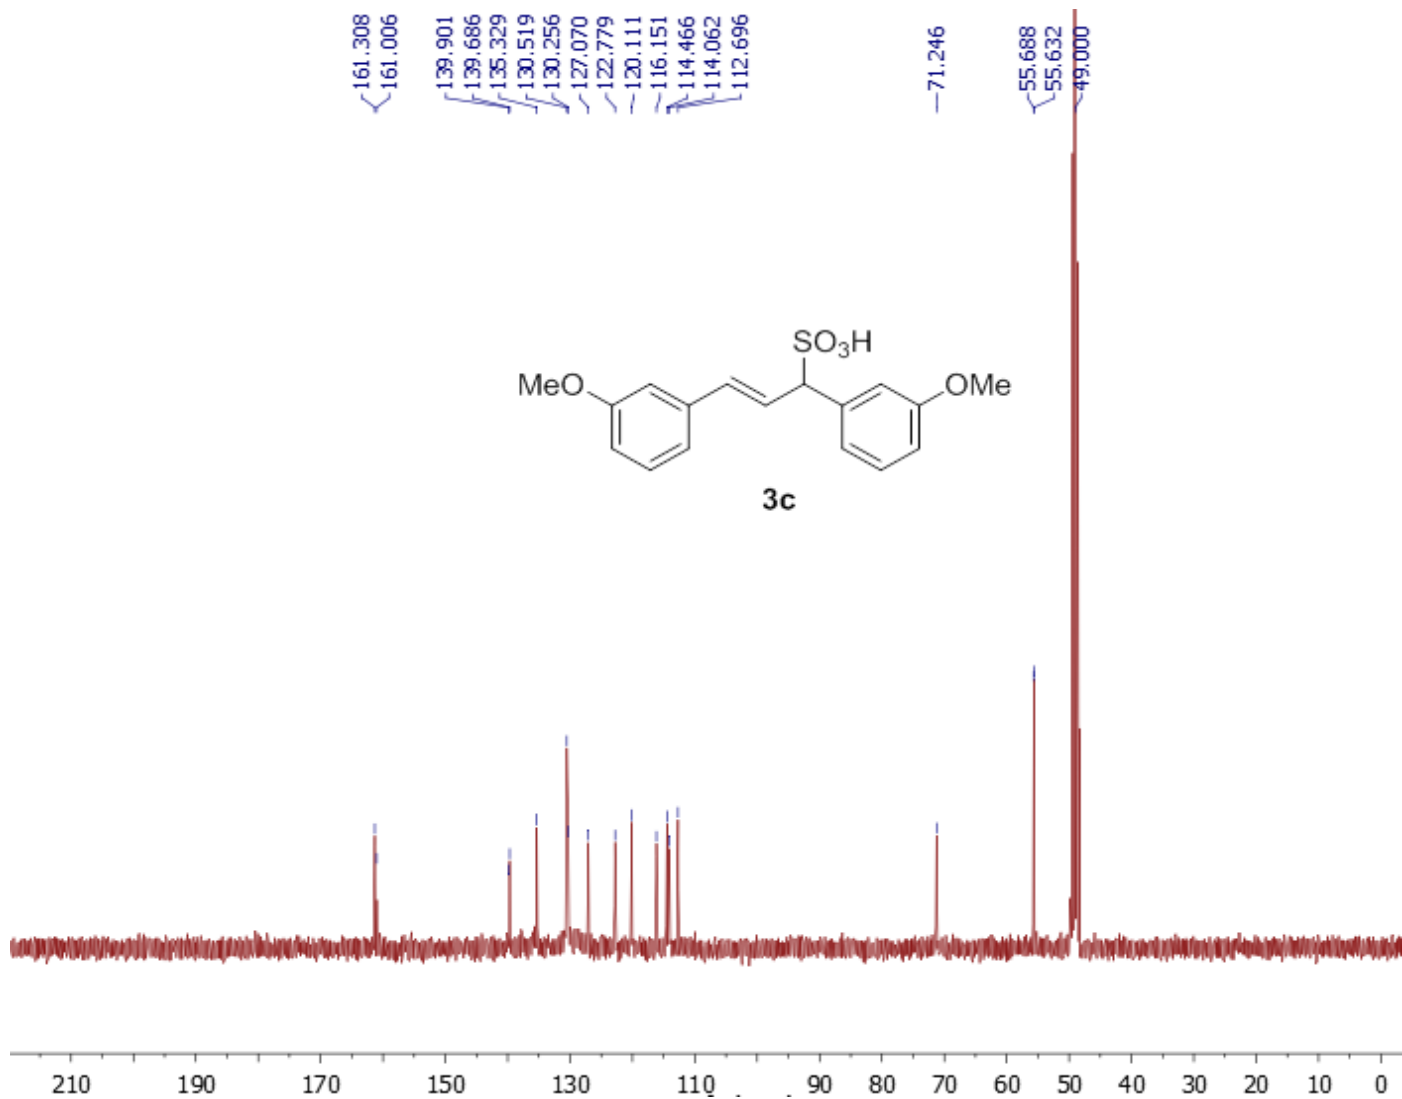

7.338  
7.322  
7.302  
7.266  
7.249  
7.225  
7.201  
7.038  
6.995  
6.973  
6.953  
6.811  
6.788  
6.771  
6.749  
6.651  
6.611  
4.833  
4.811

*(Handwritten annotations in green ink, including a vertical line and several horizontal strokes, likely indicating integration or peak assignments.)*

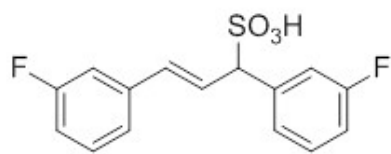

**3d**

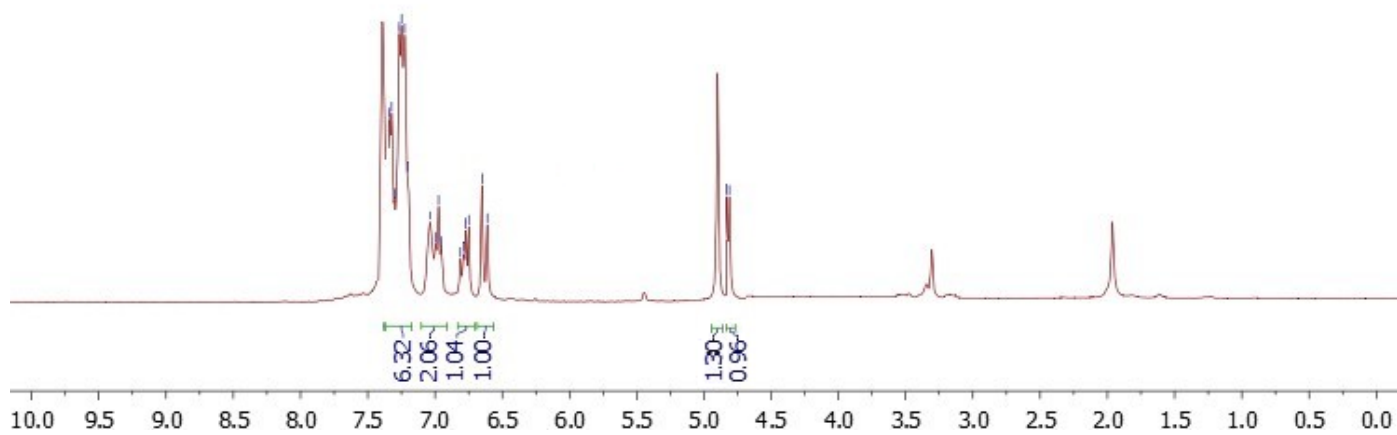

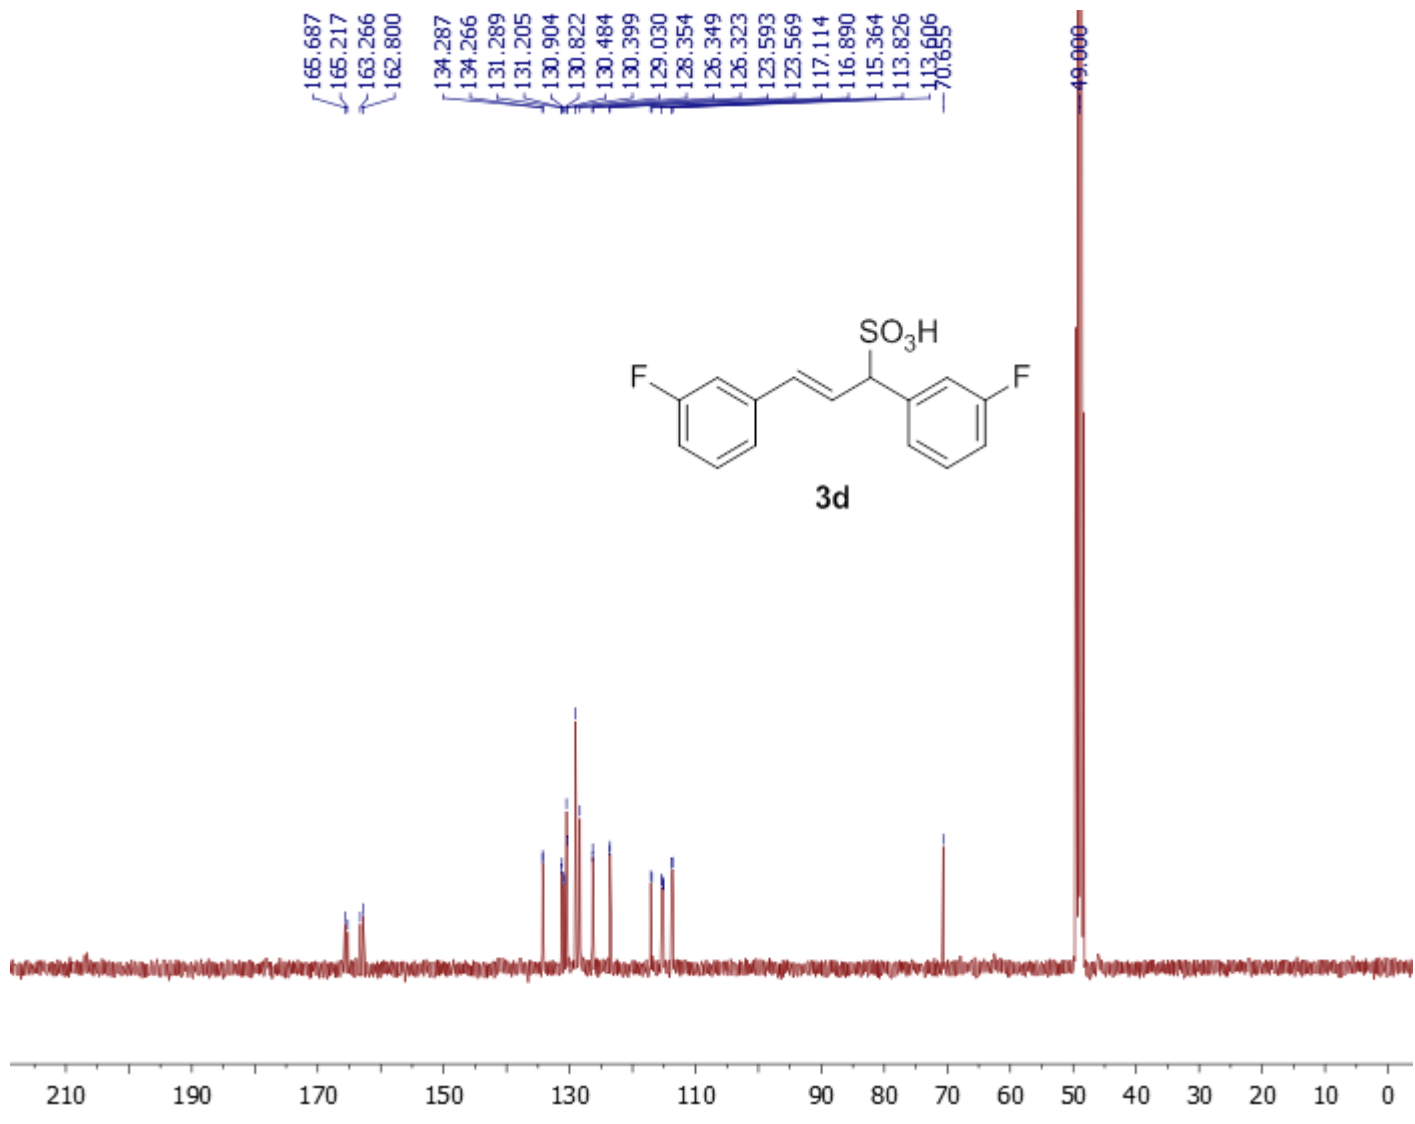

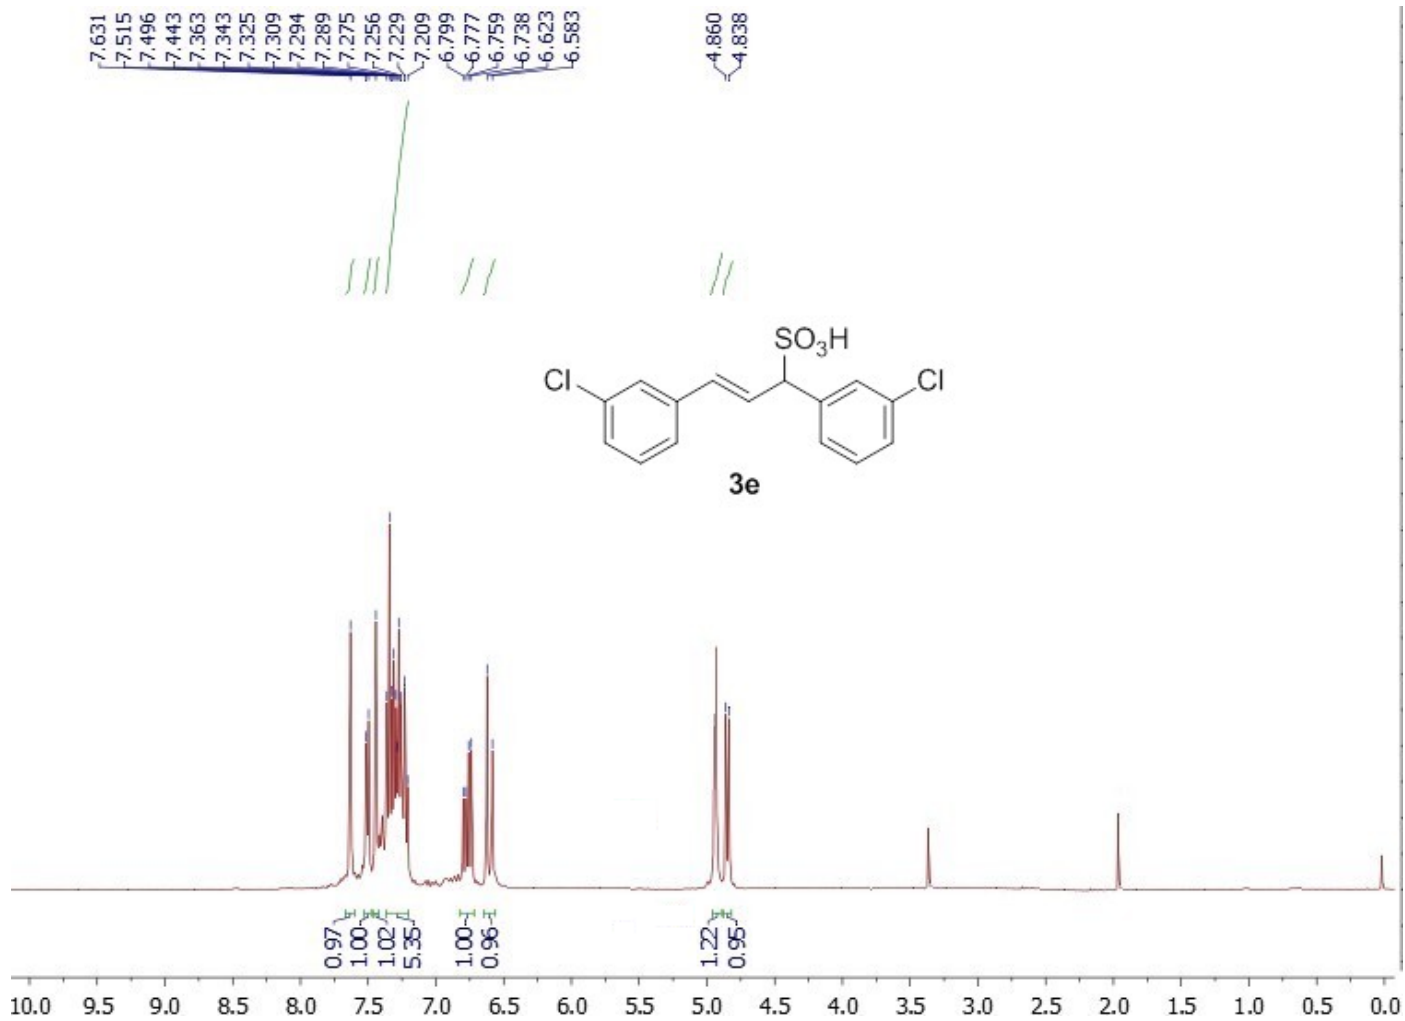

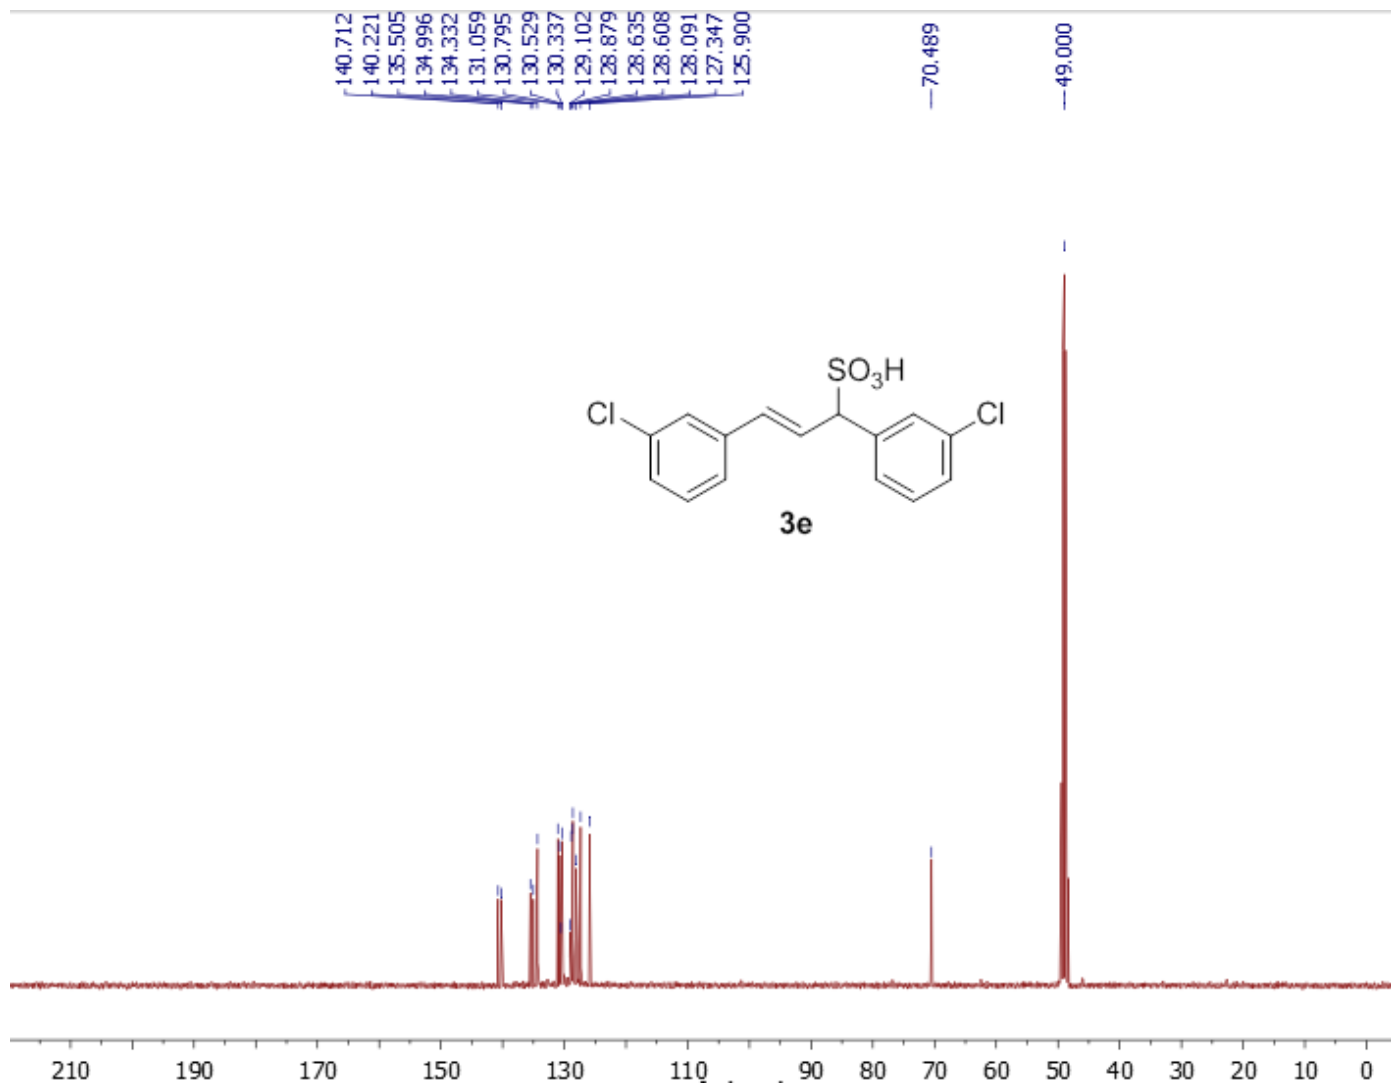

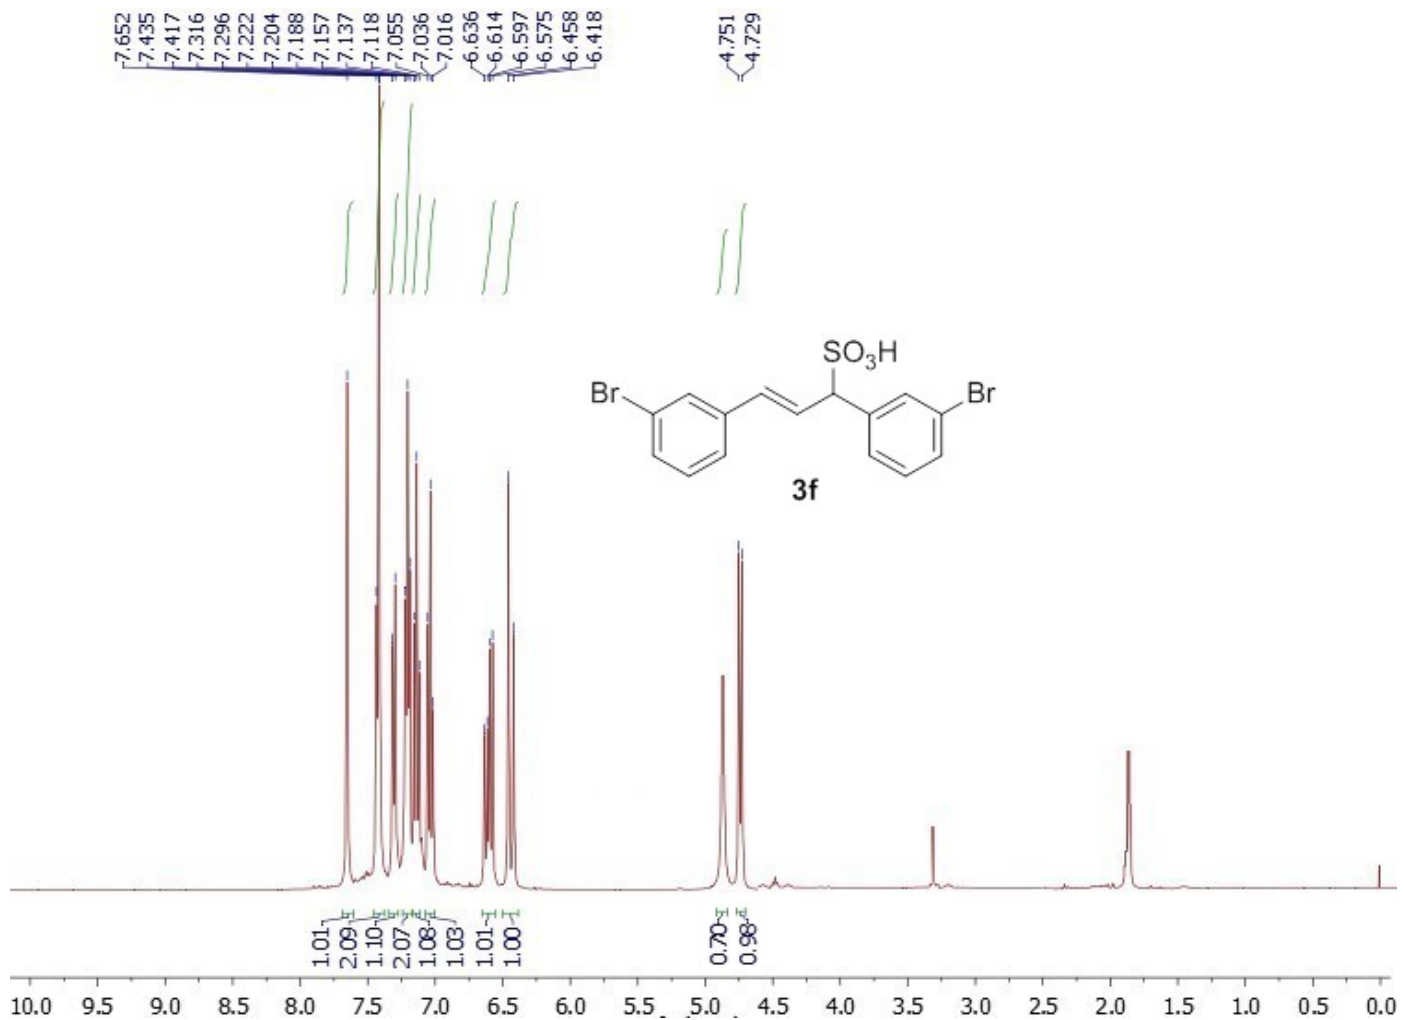

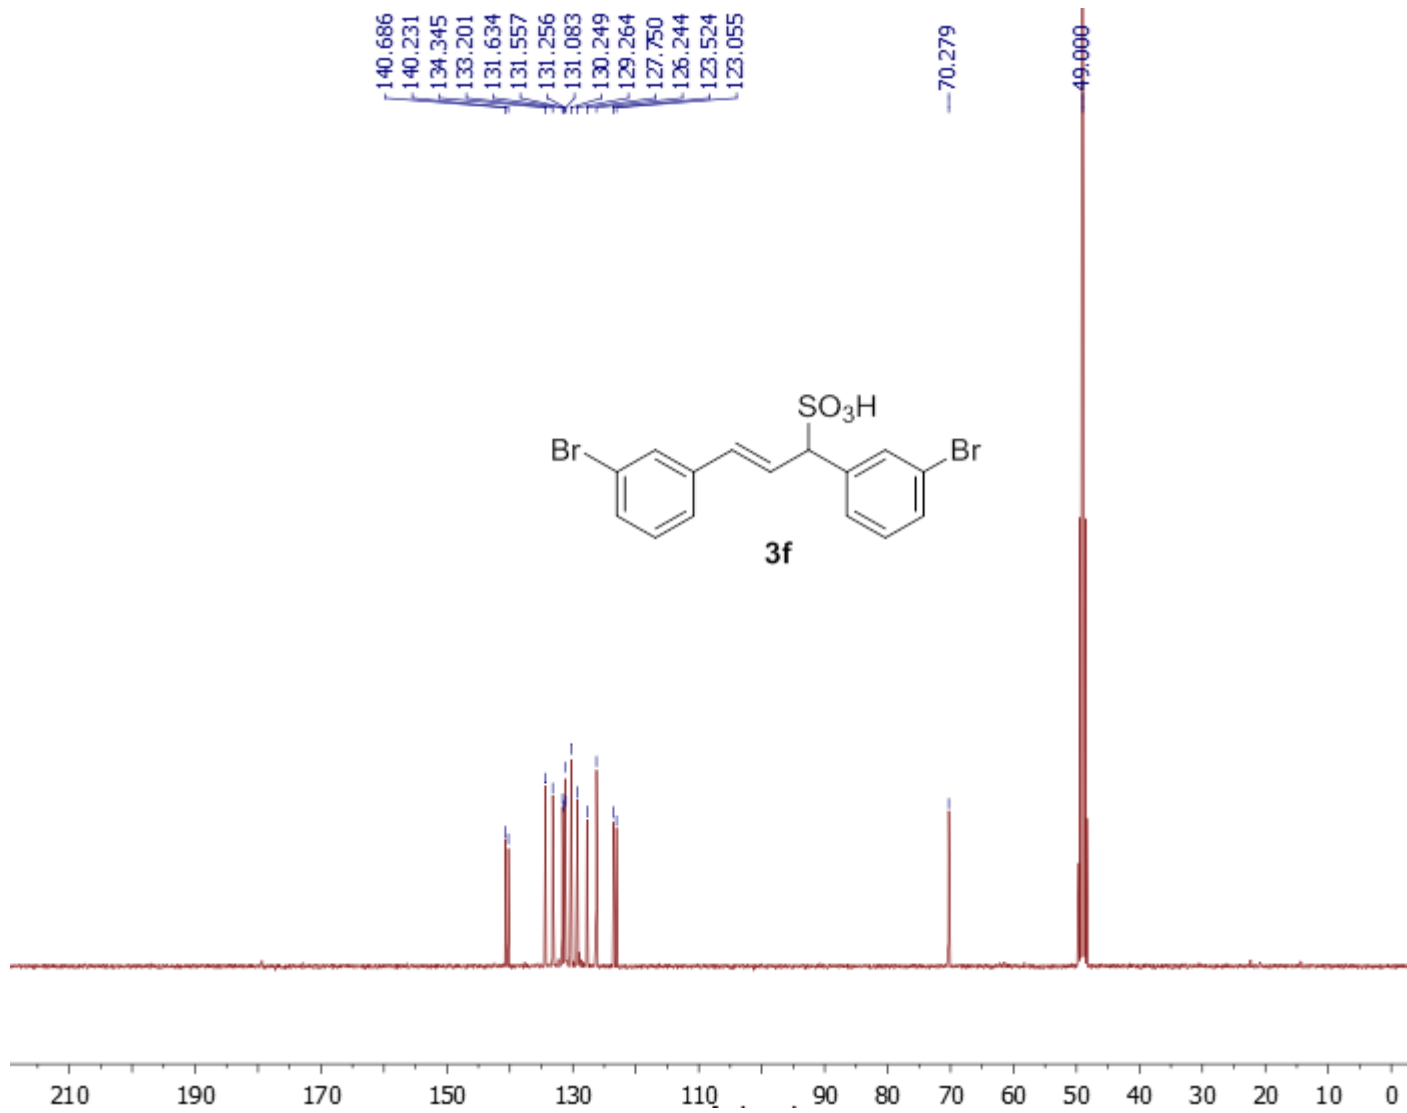



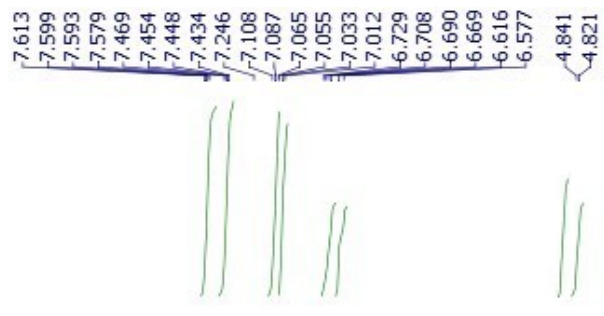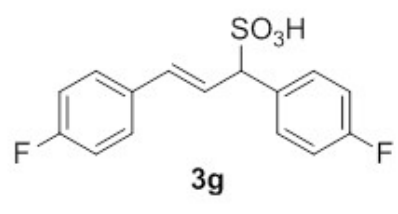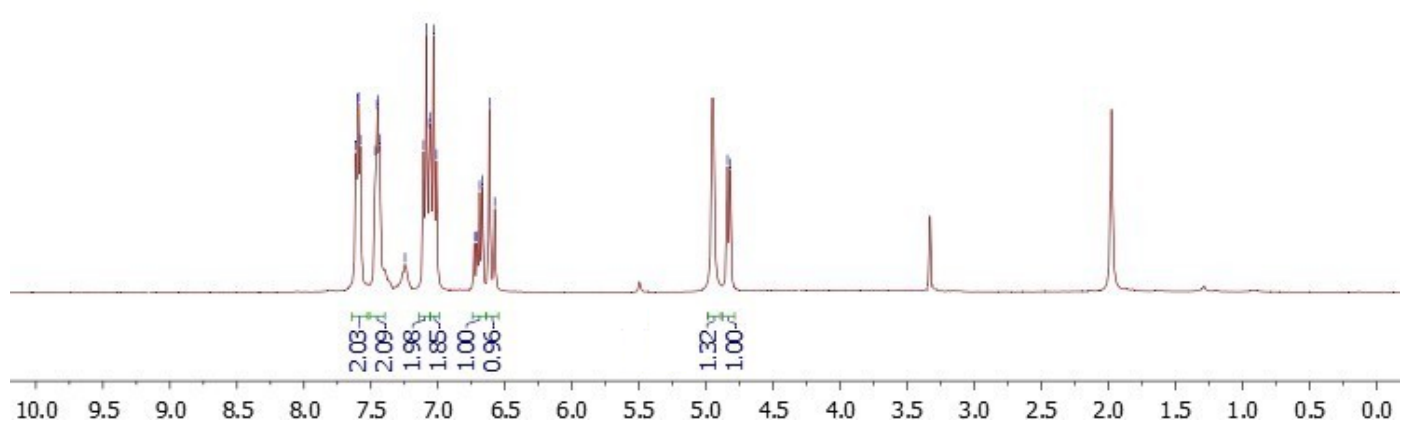

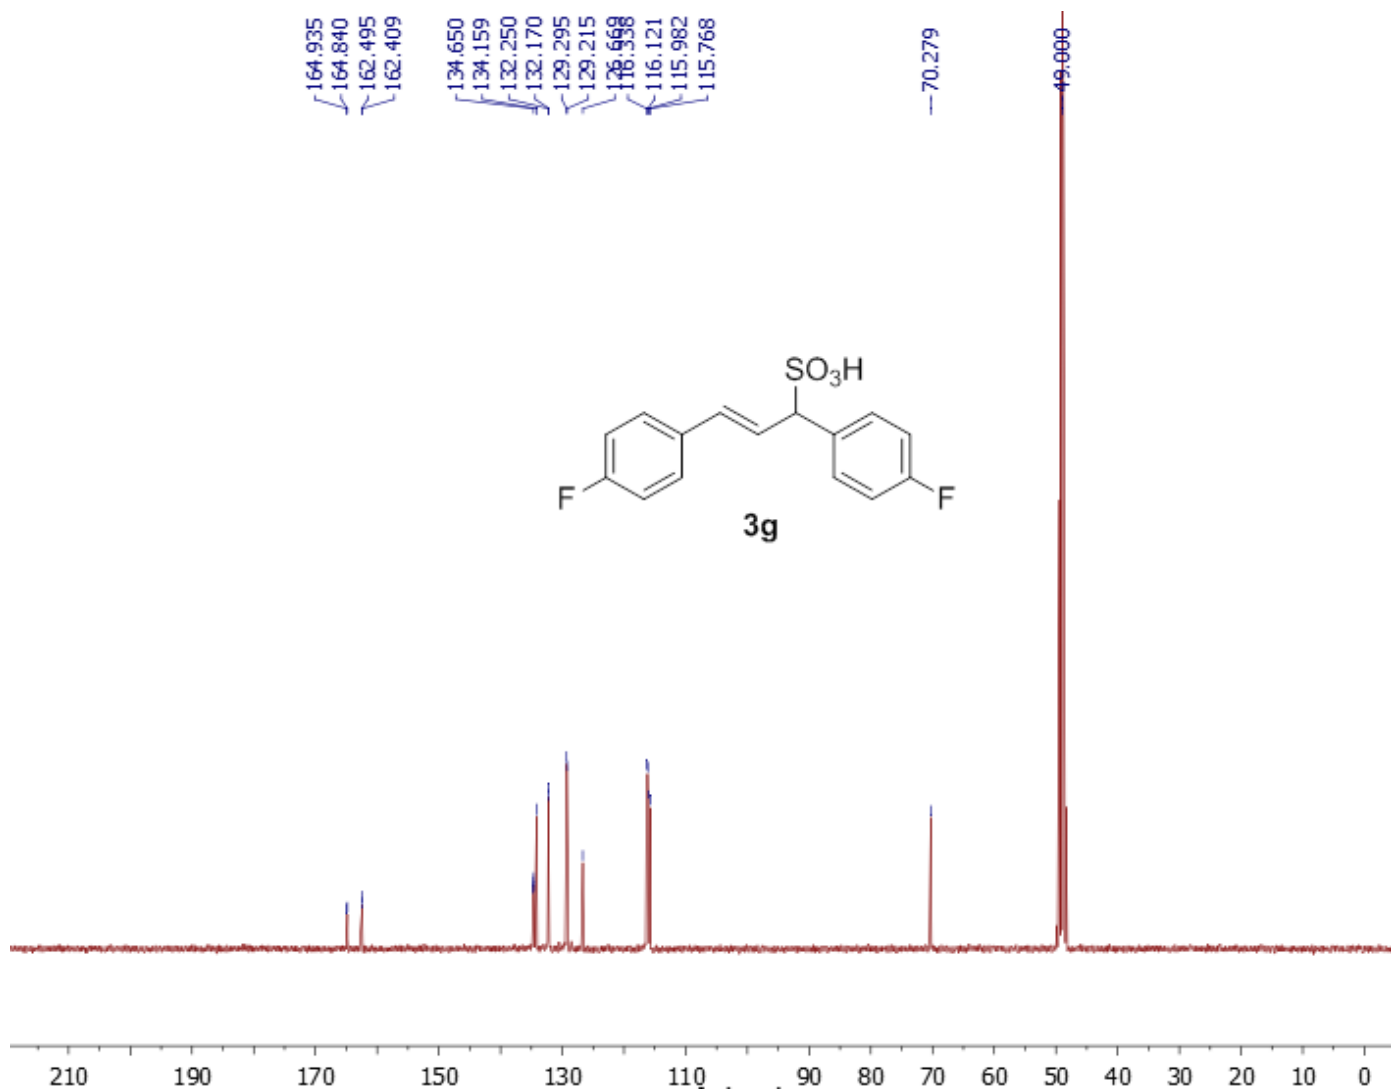

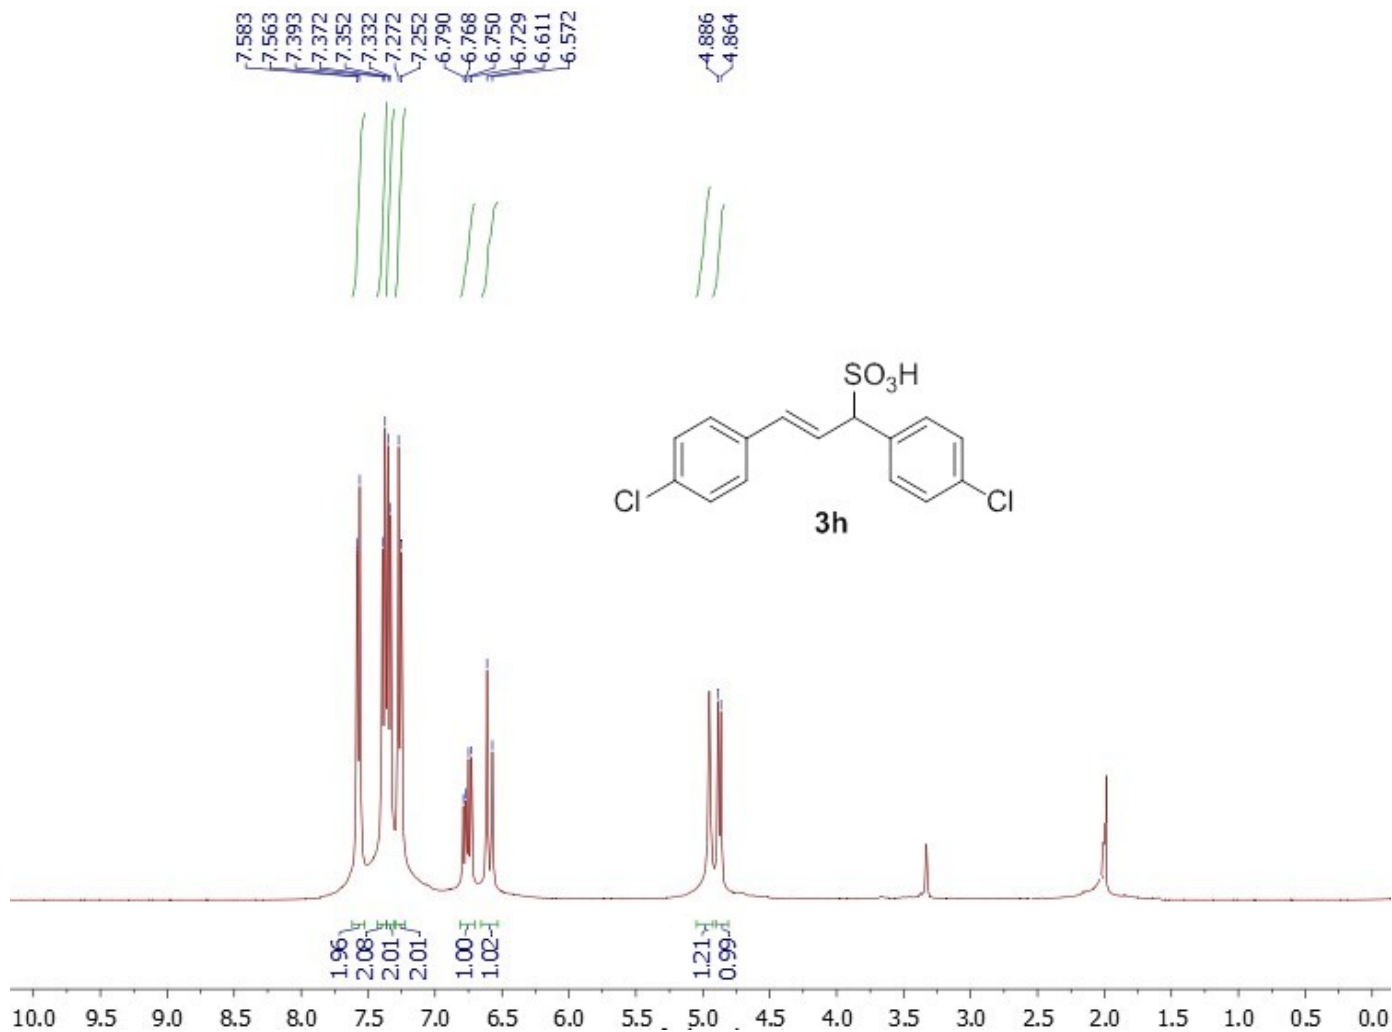

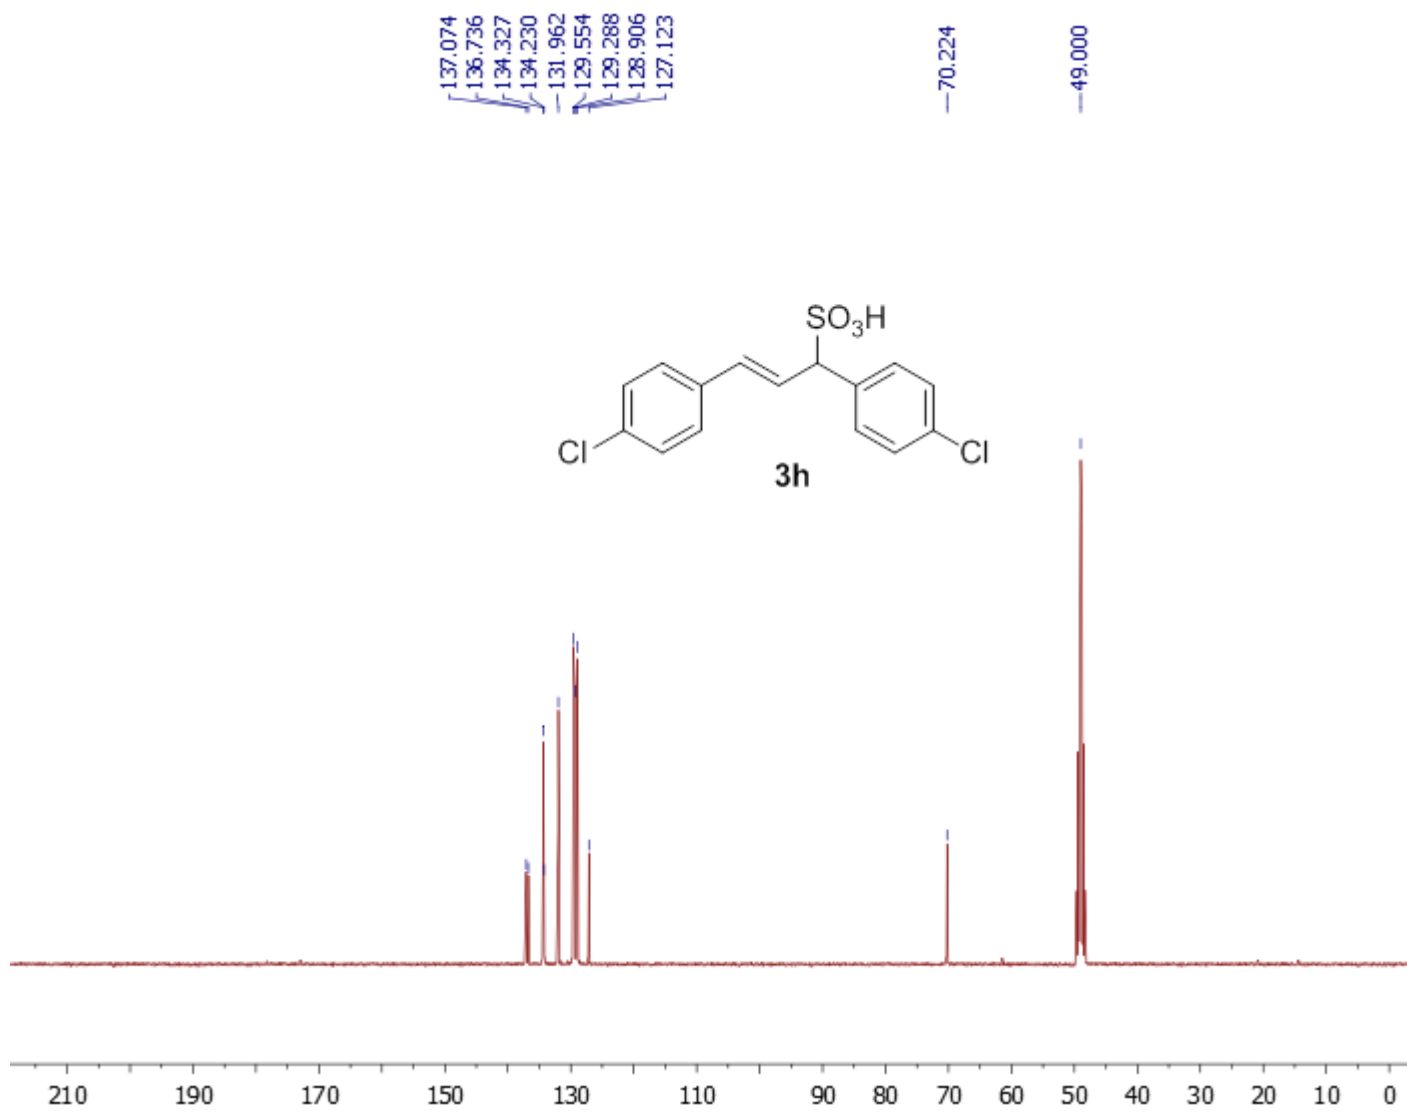

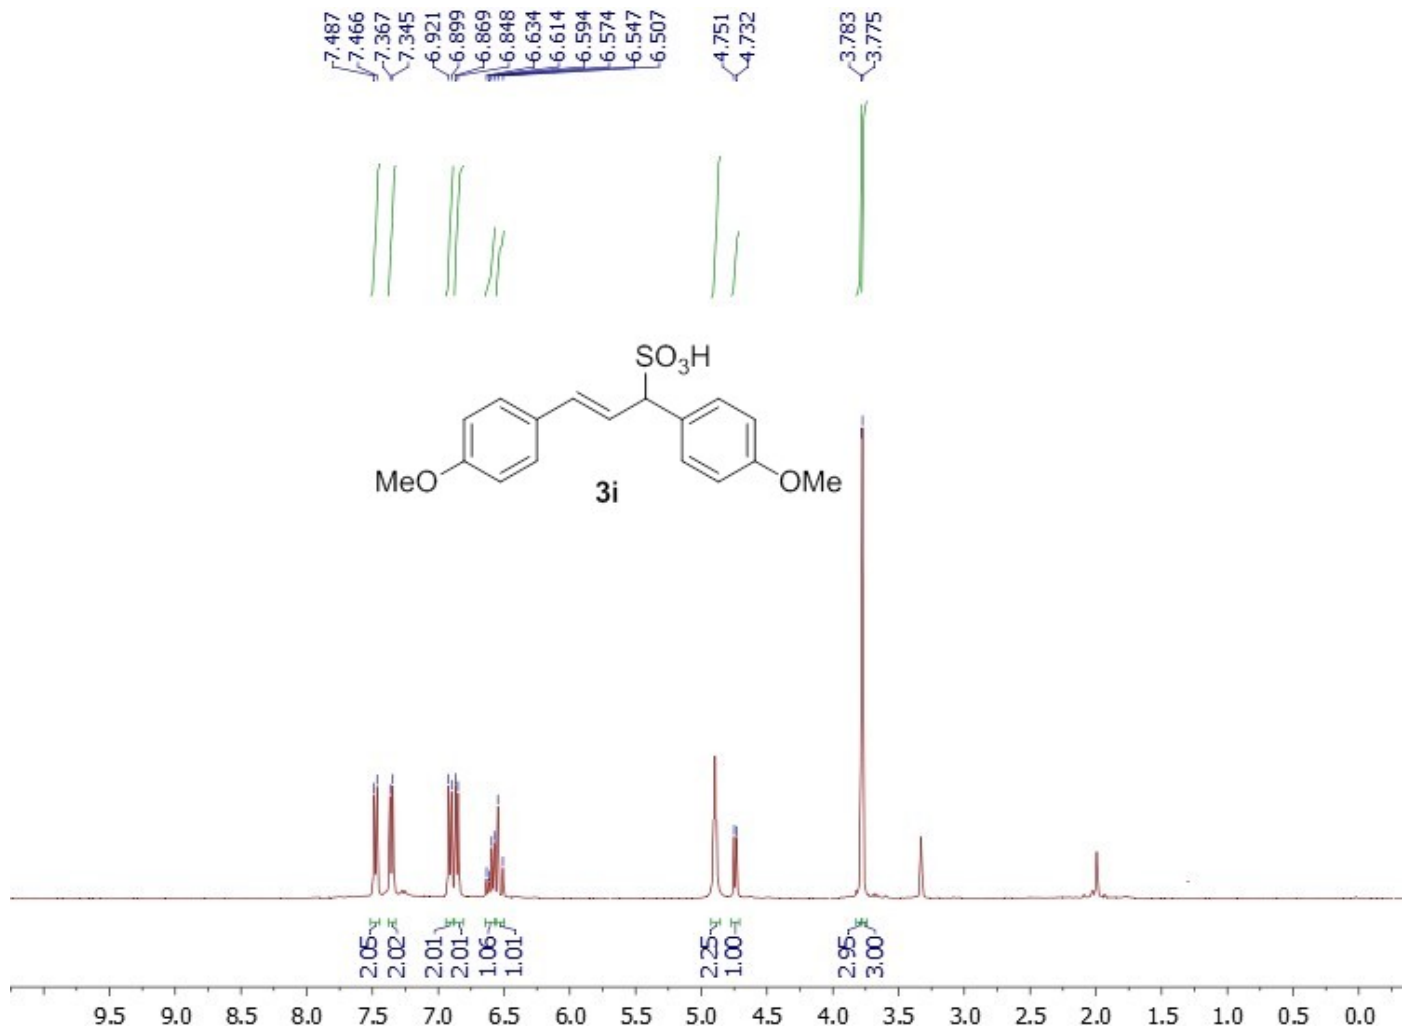

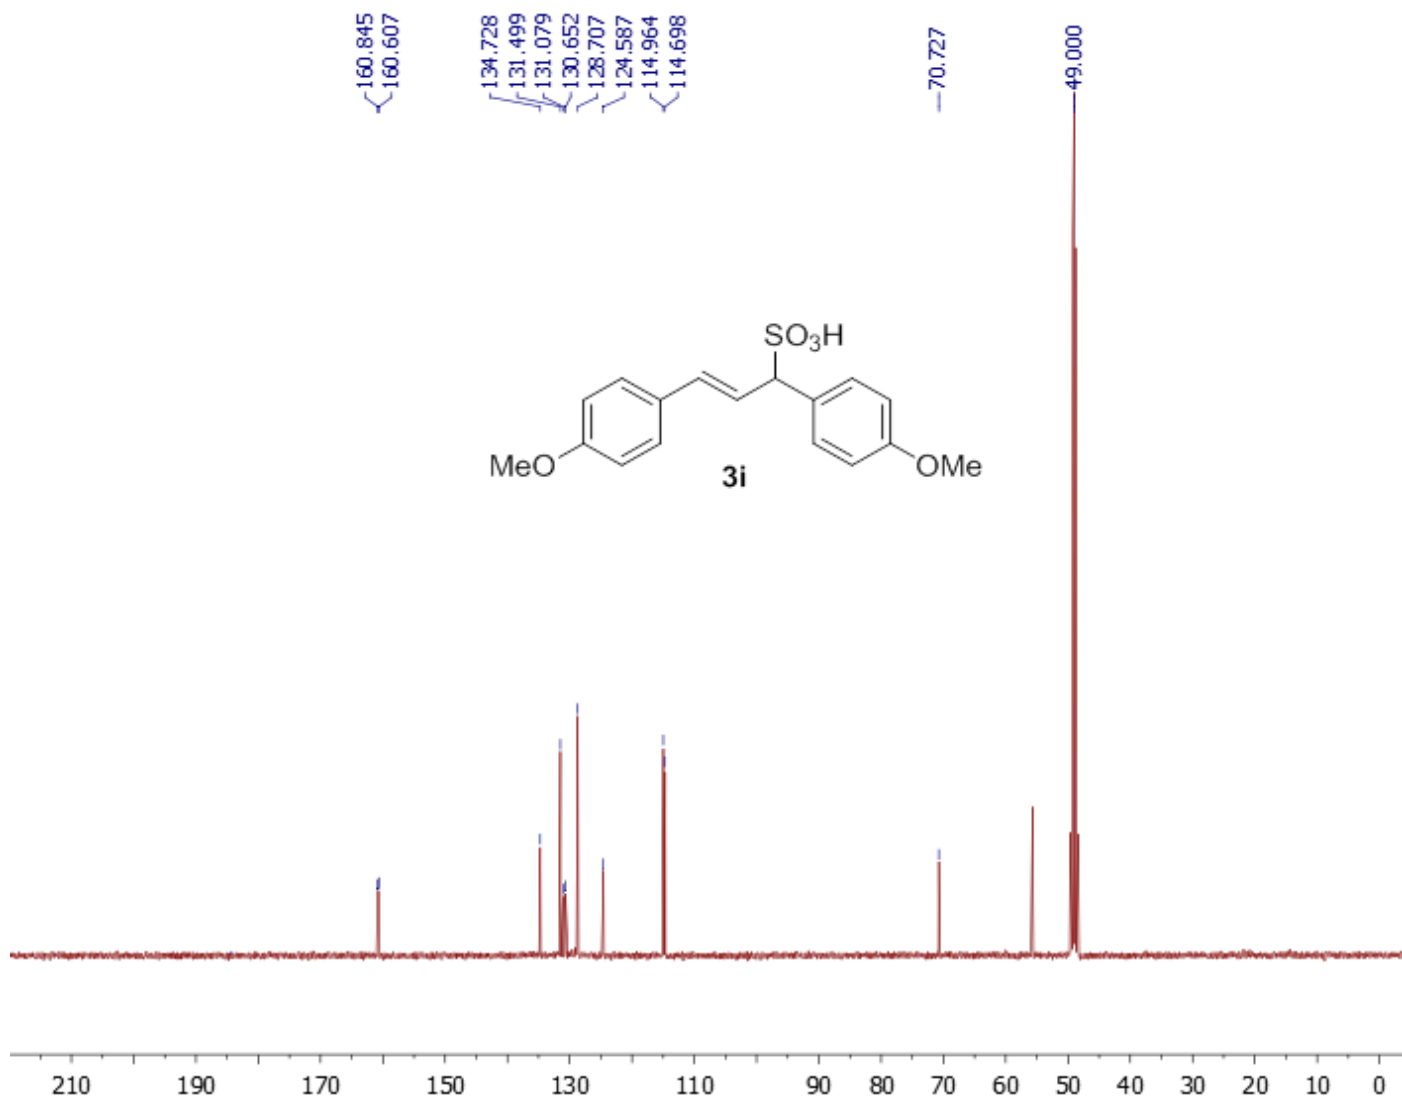

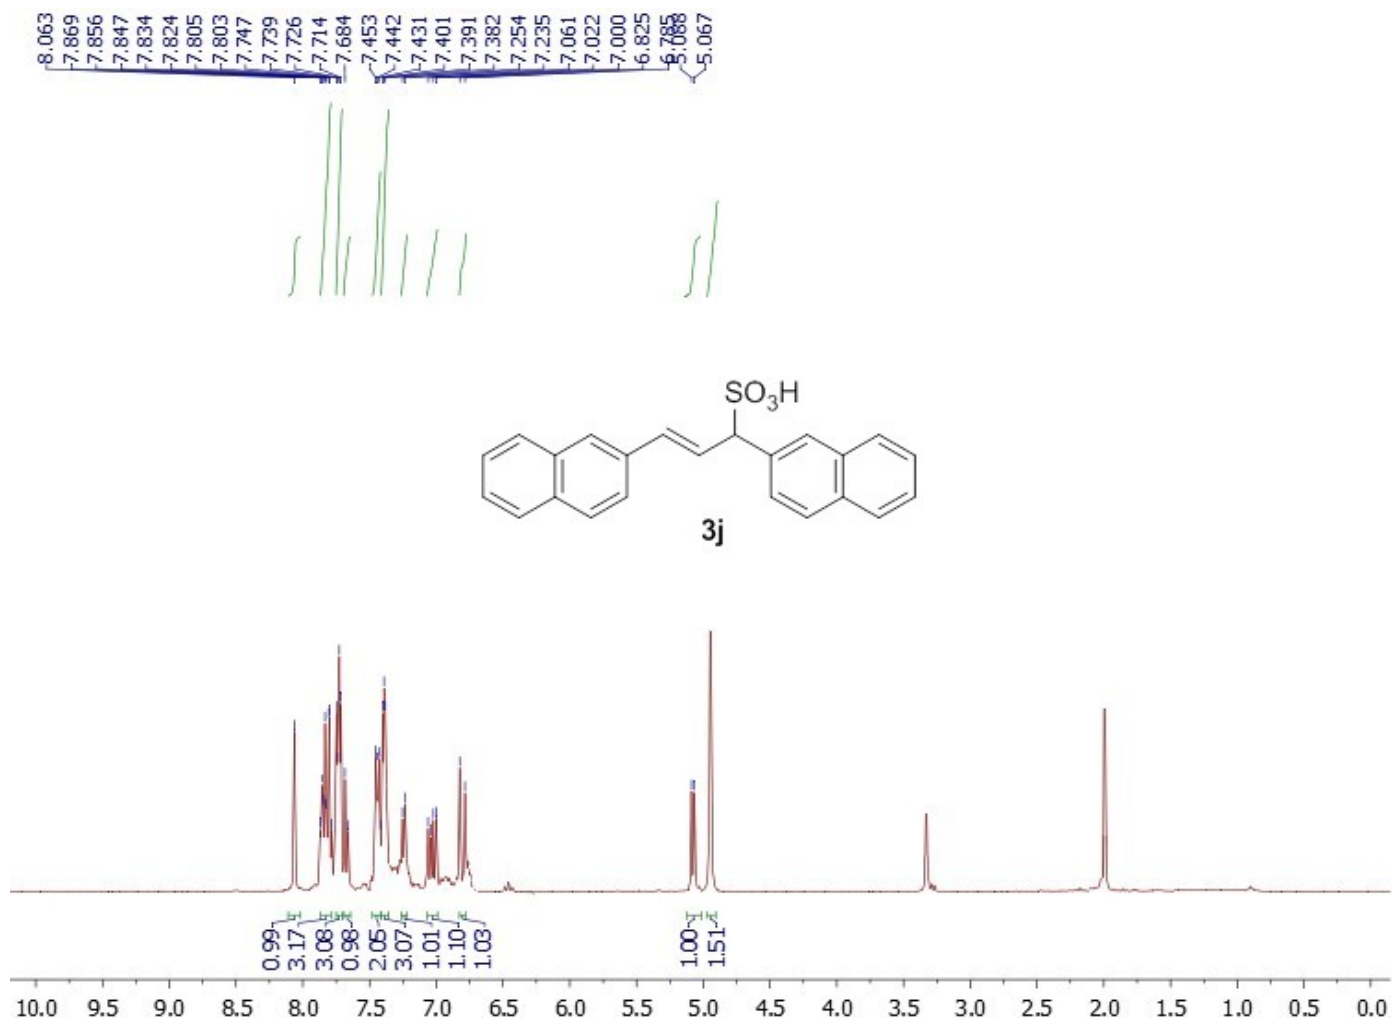

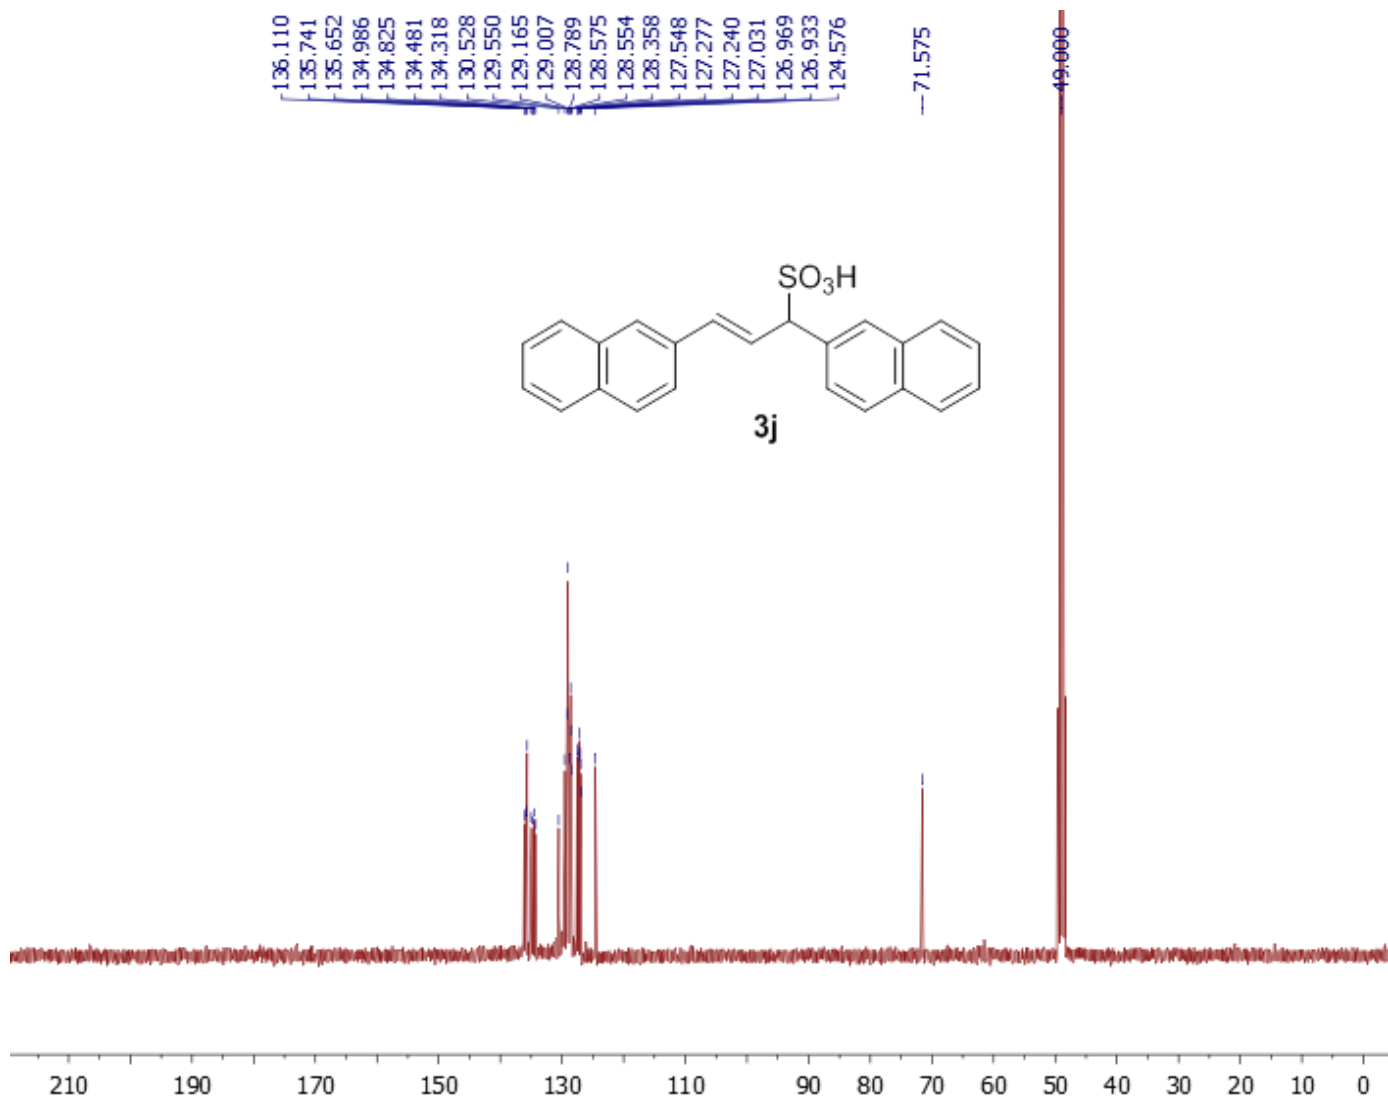



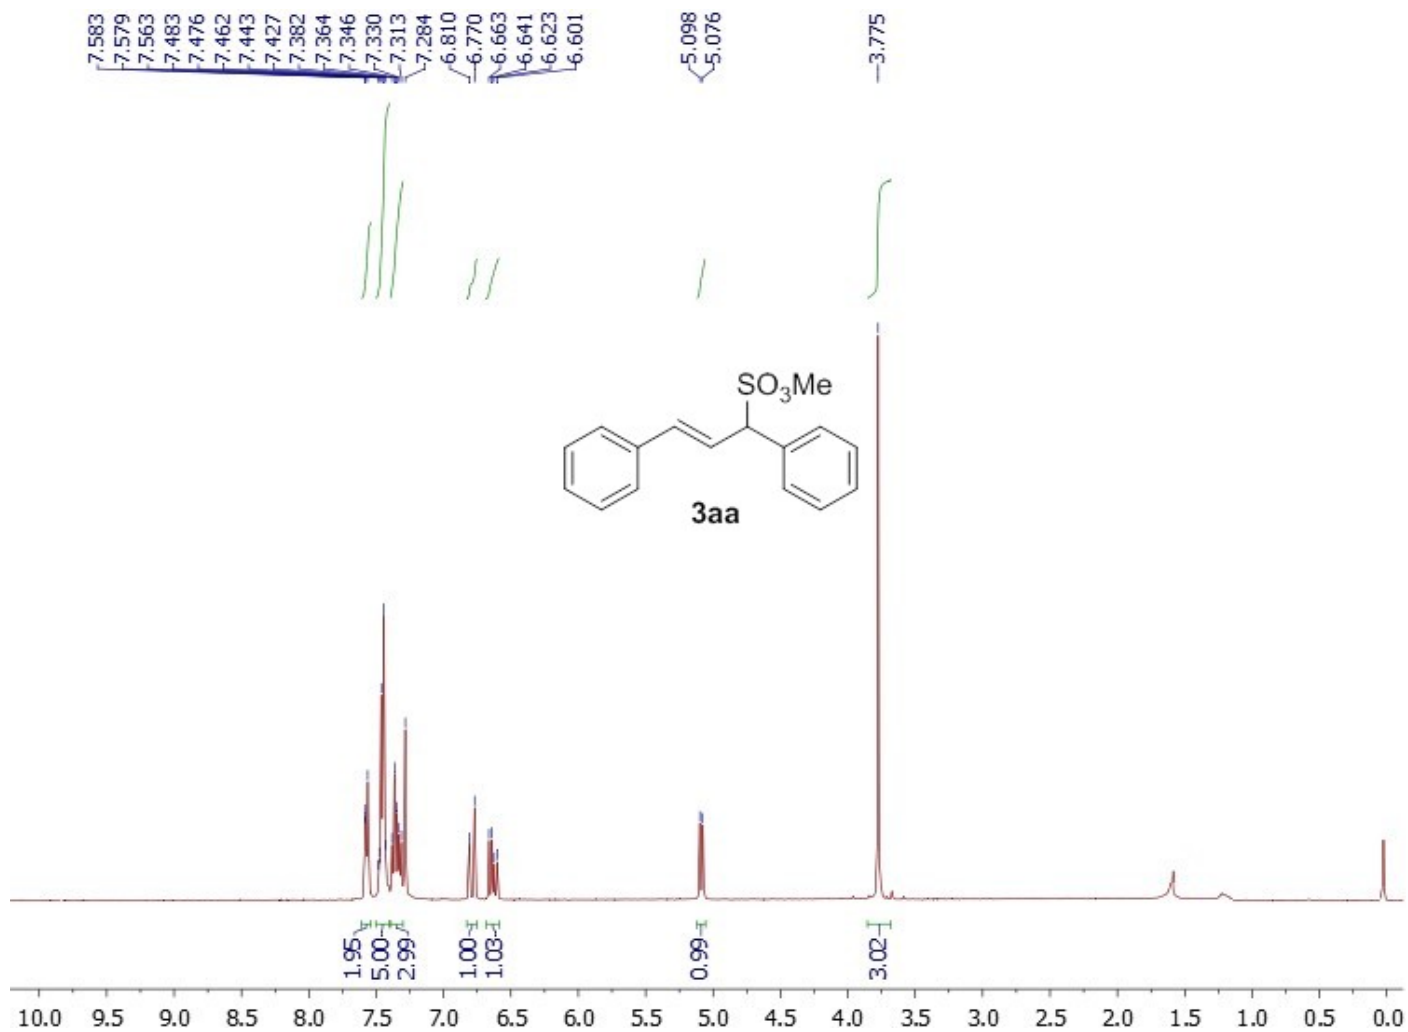

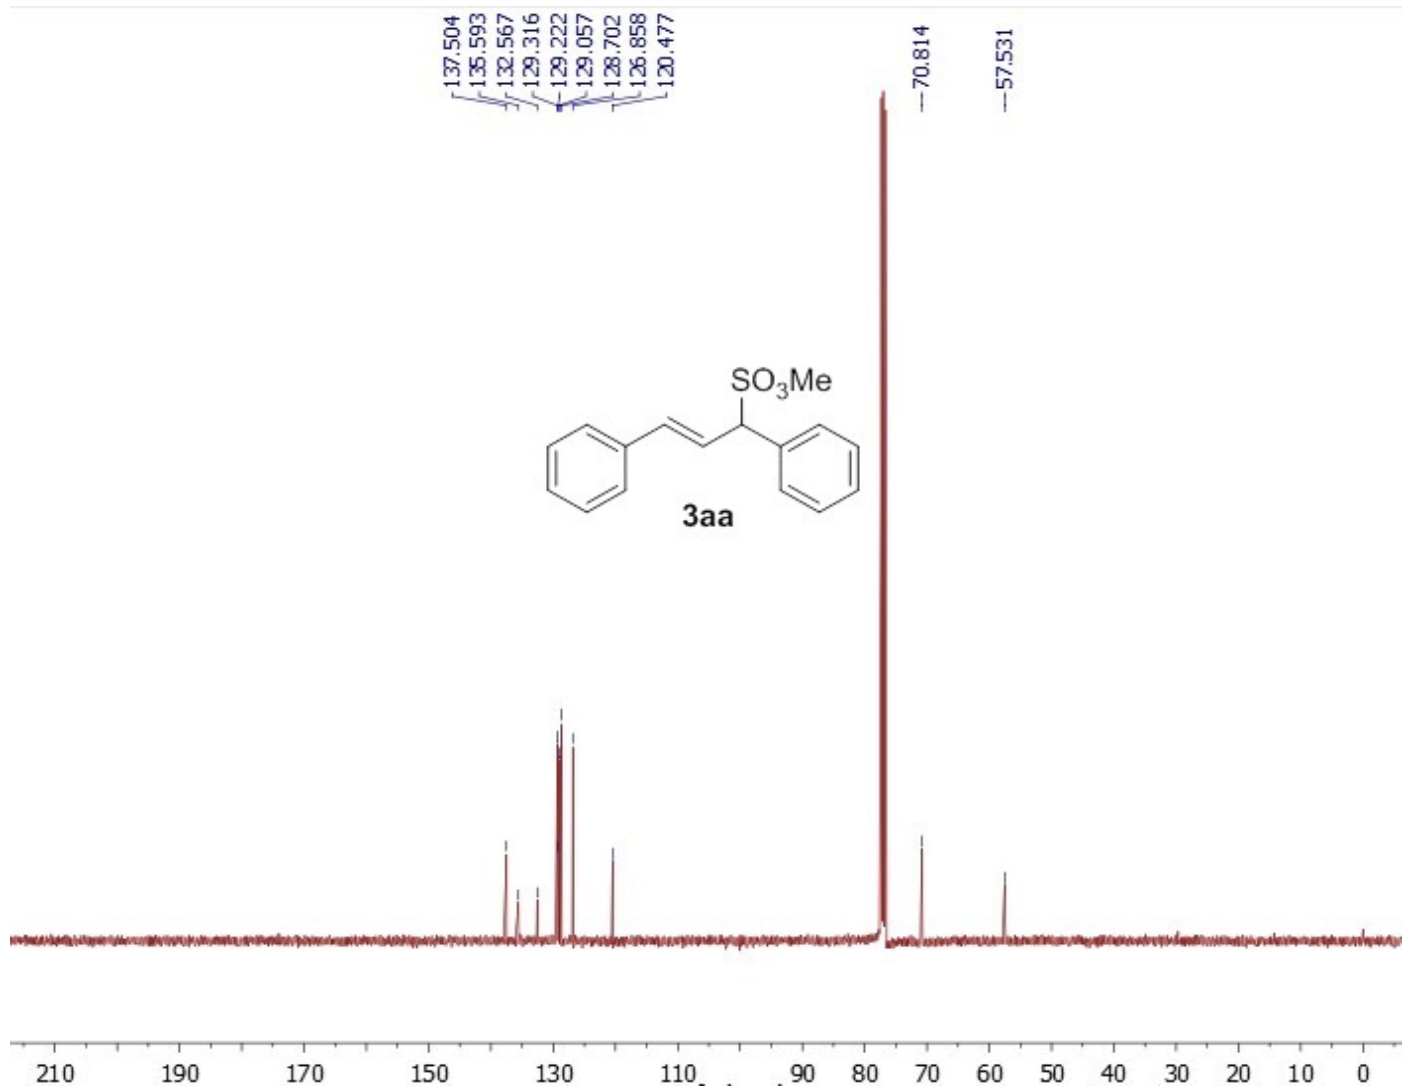

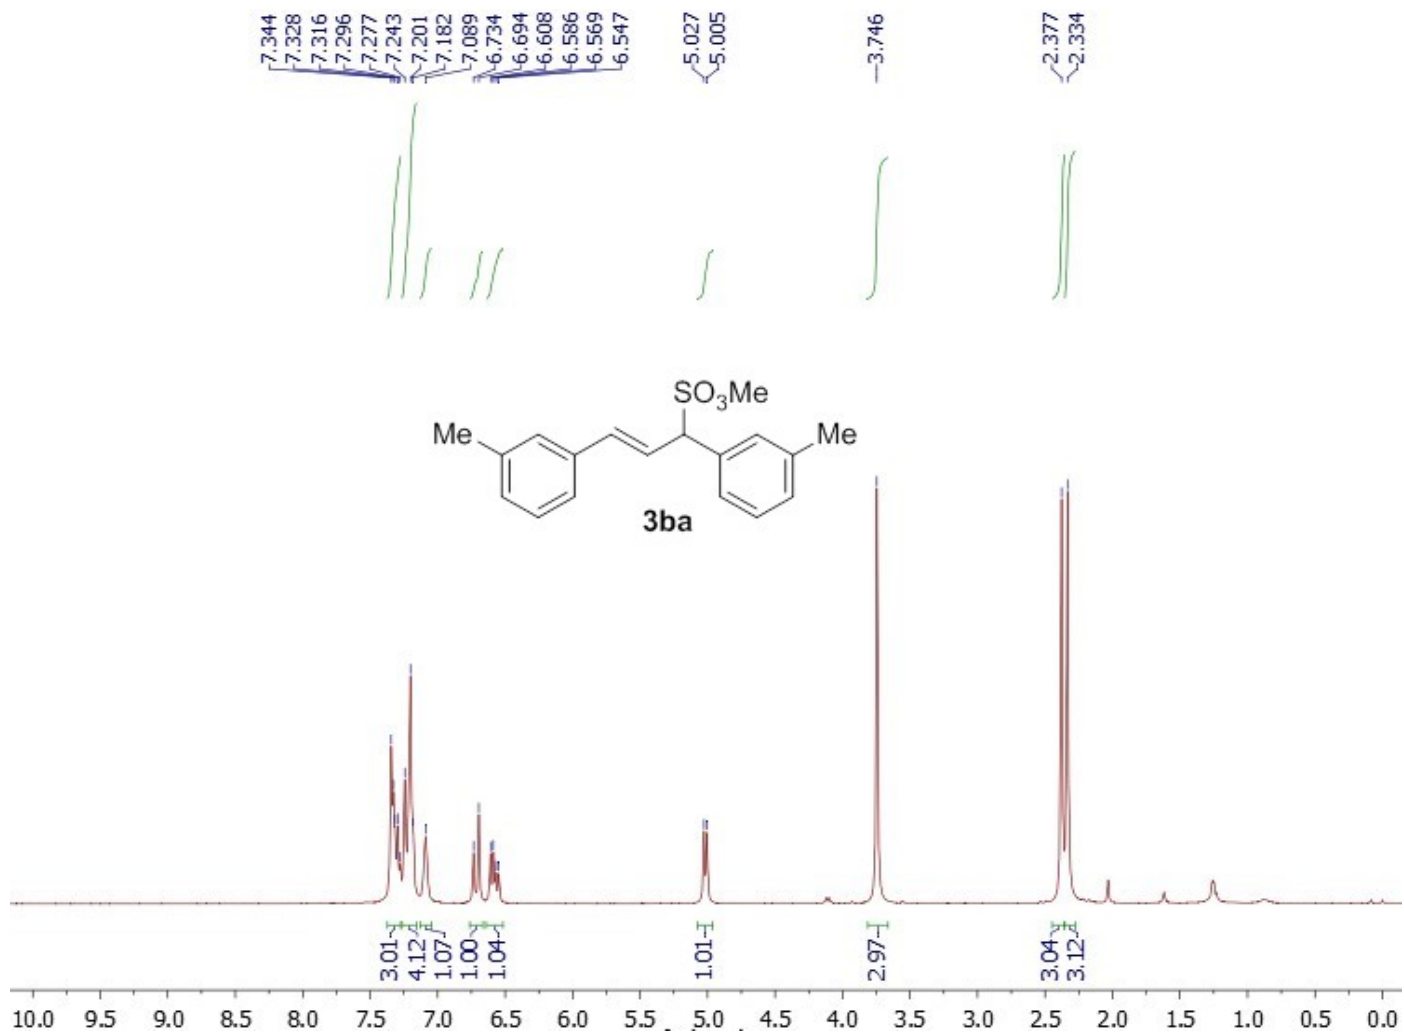

138.879  
138.353  
137.499  
135.608  
132.530  
130.026  
129.918  
129.504  
128.958  
128.634  
127.479  
126.397  
124.174  
120.449

--70.843

--57.651

<21.497  
<21.388

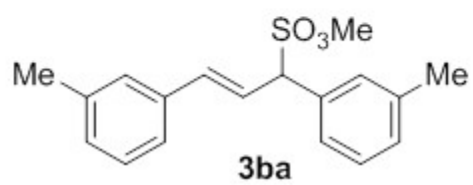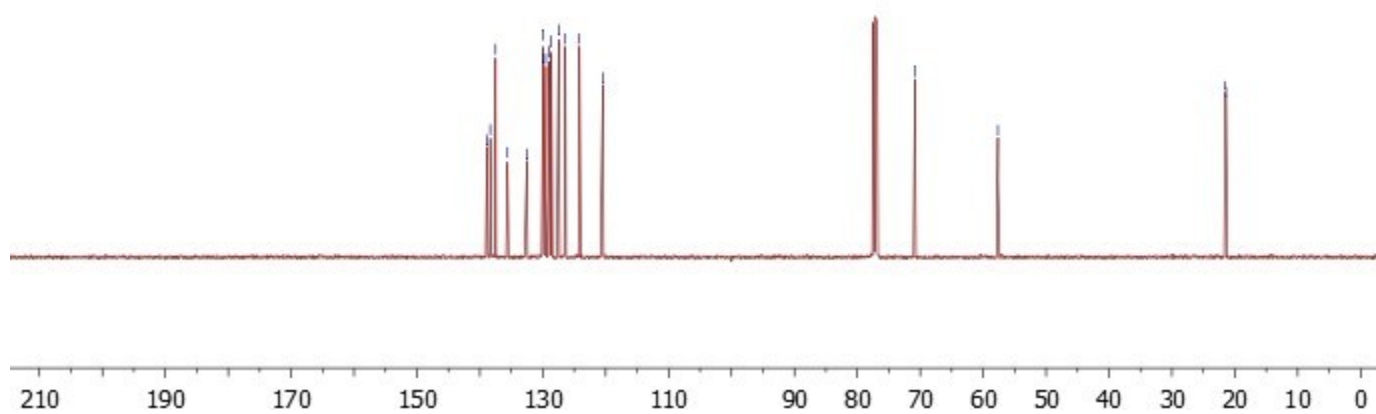

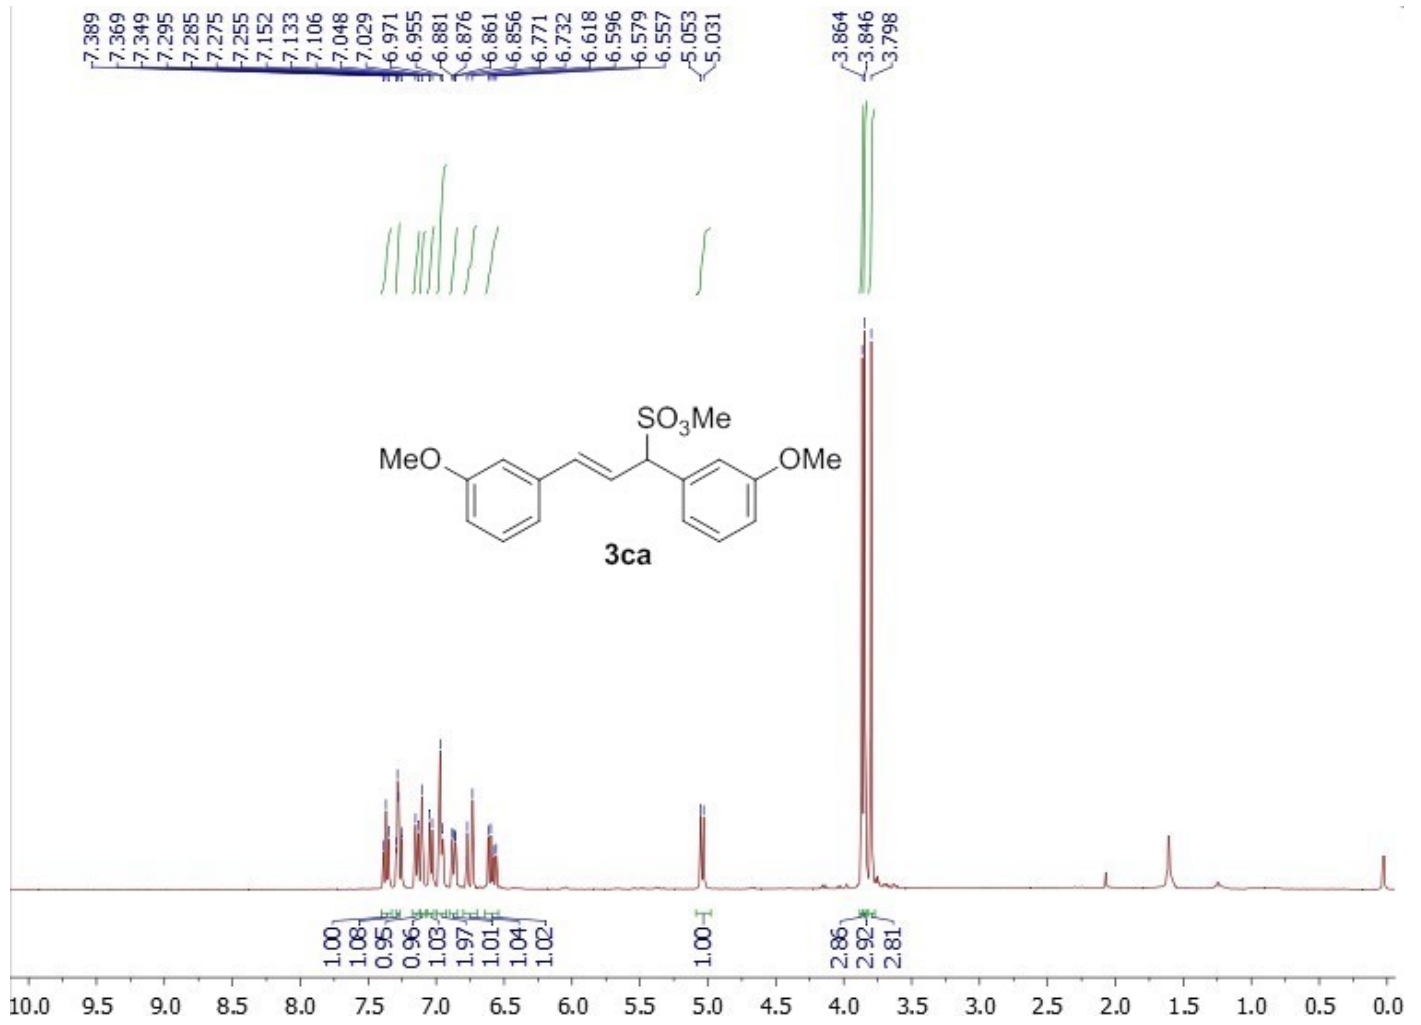

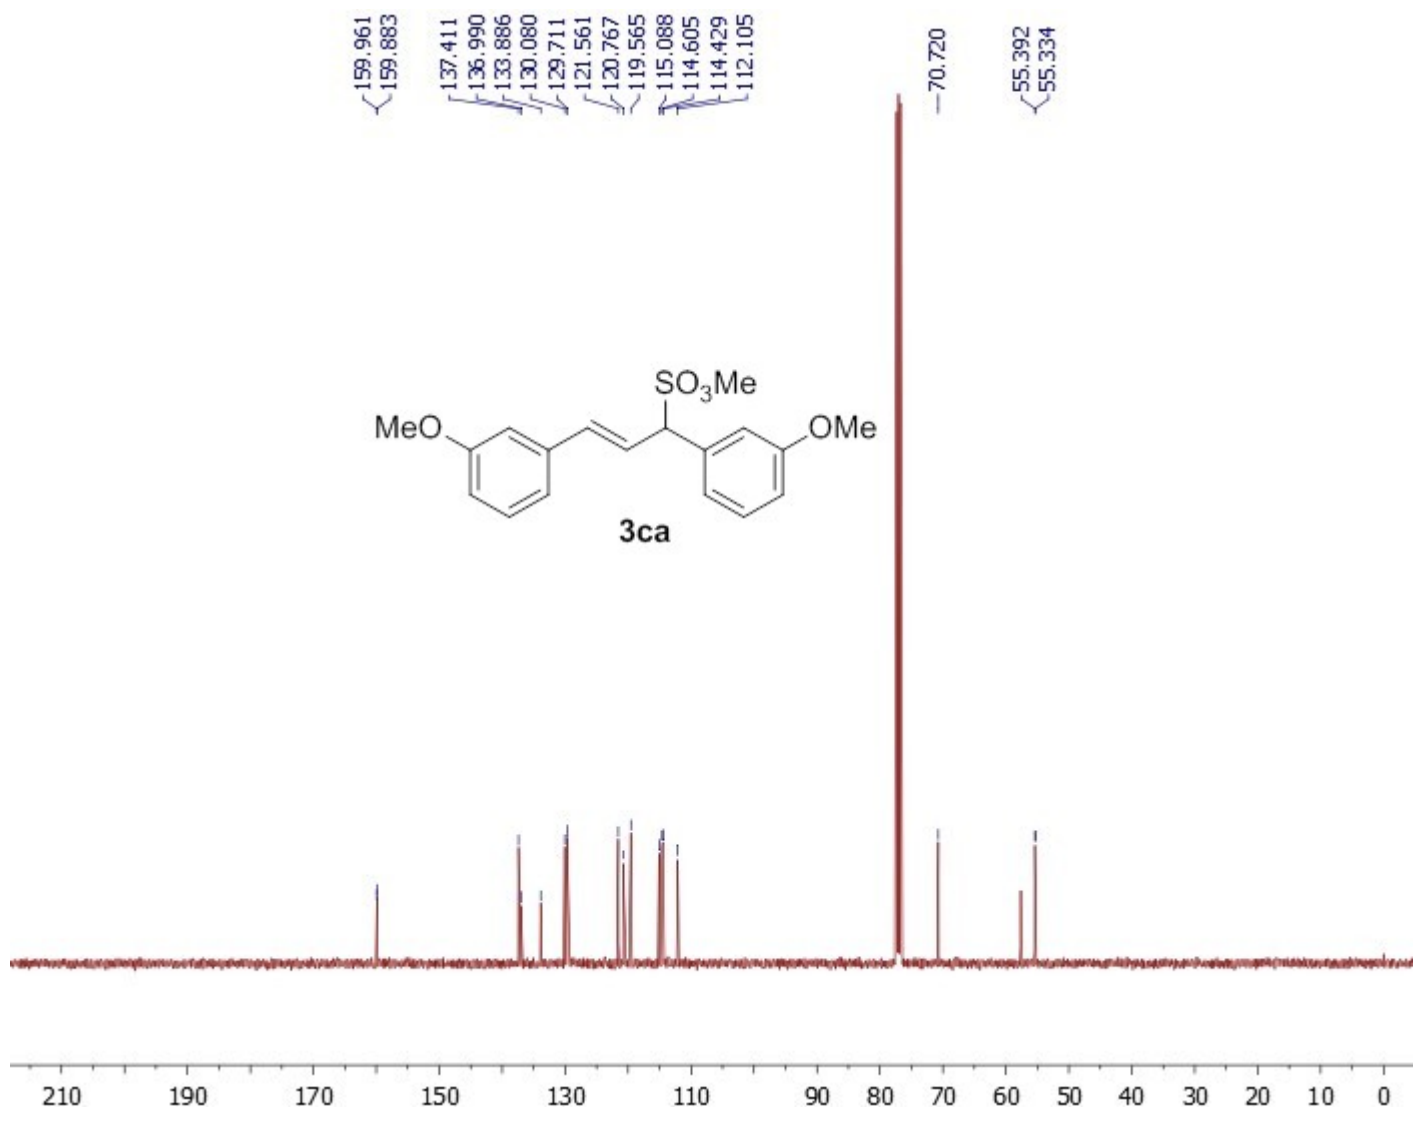

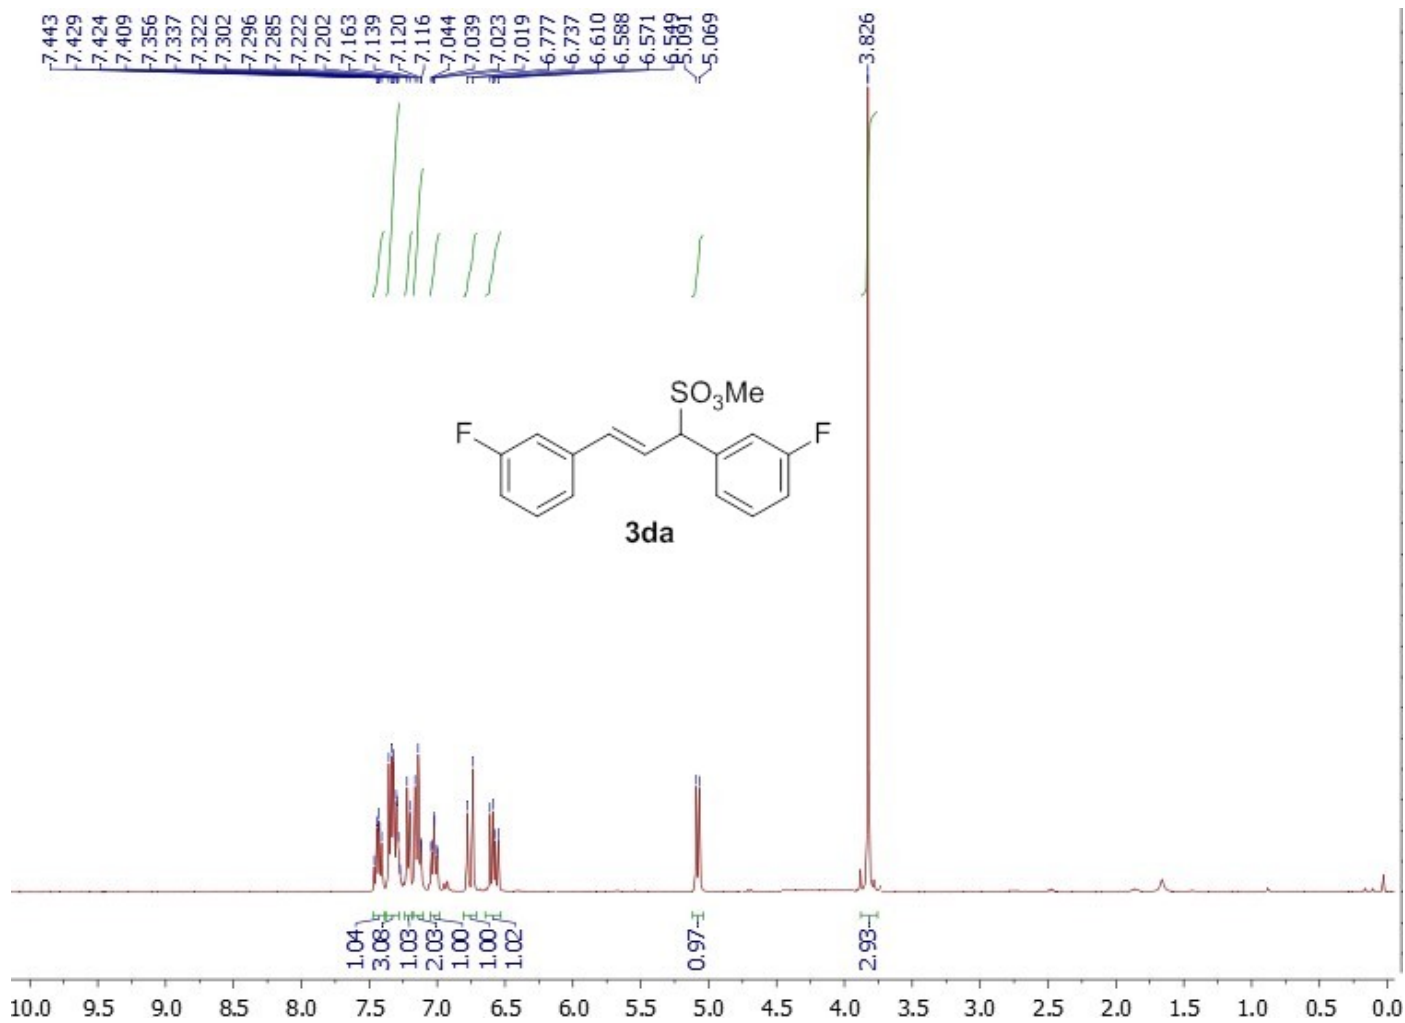

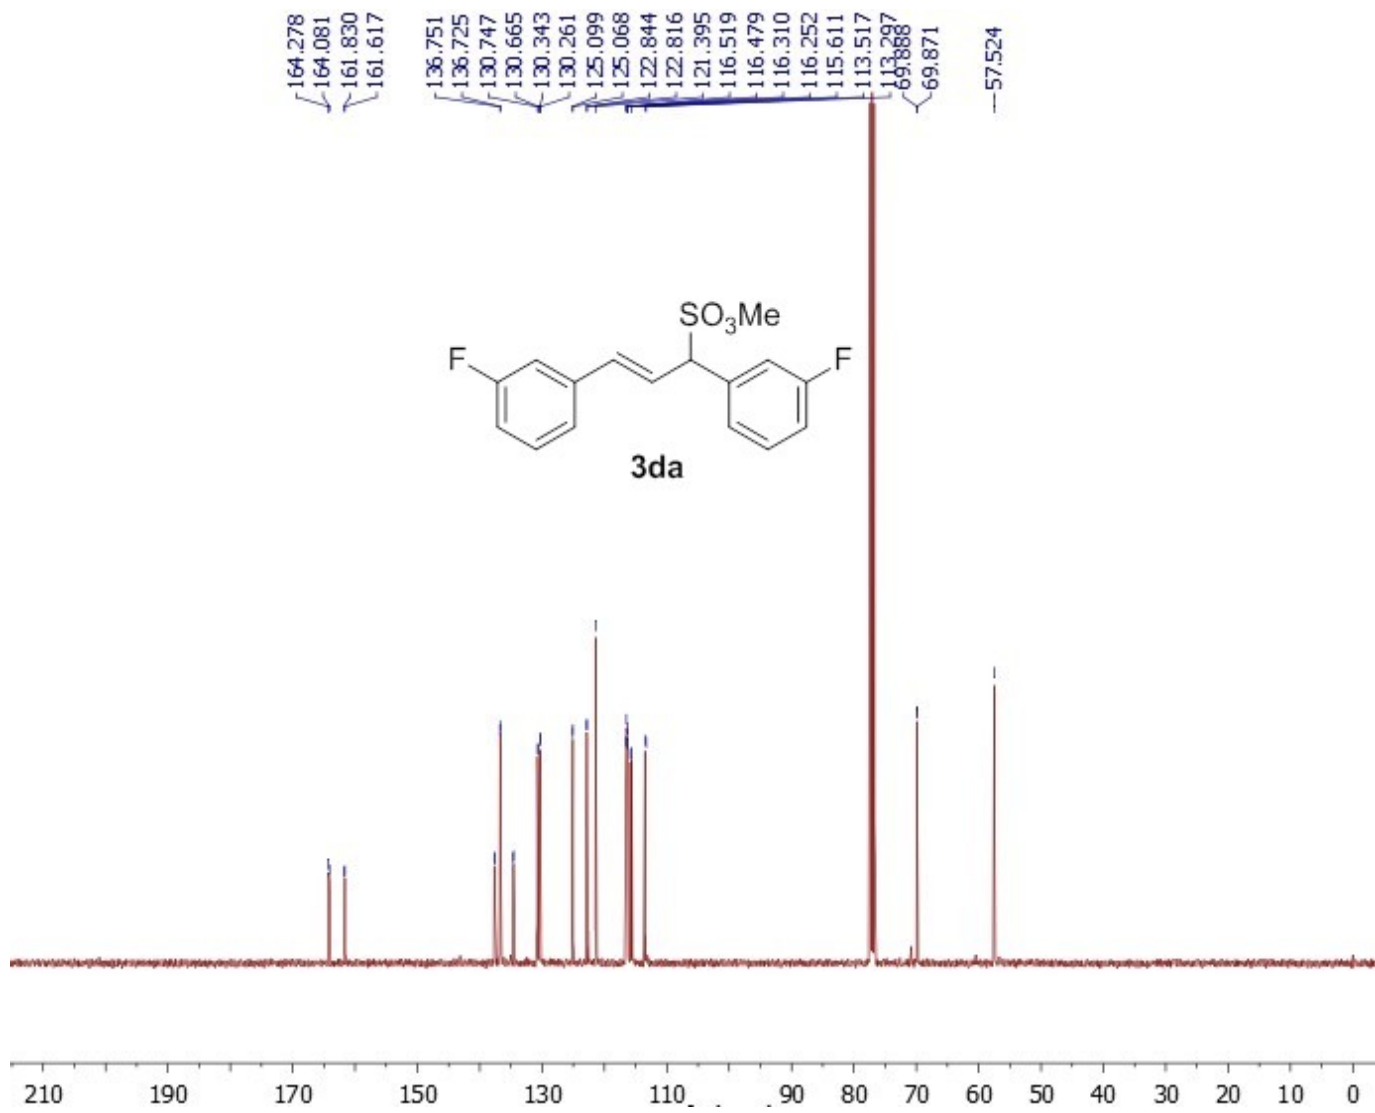



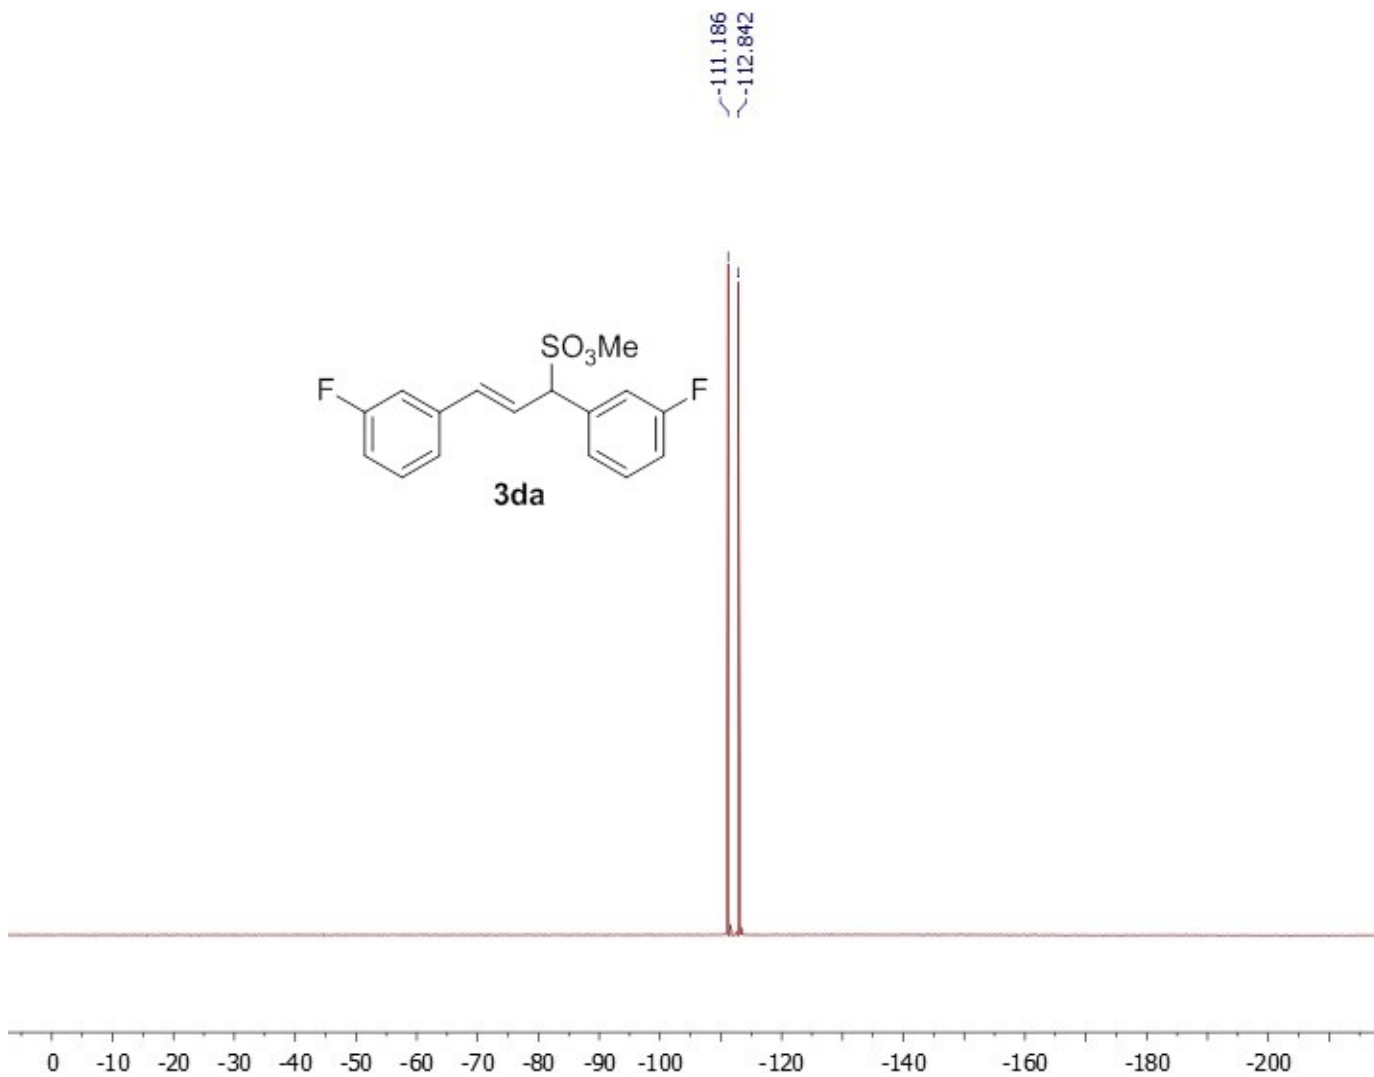

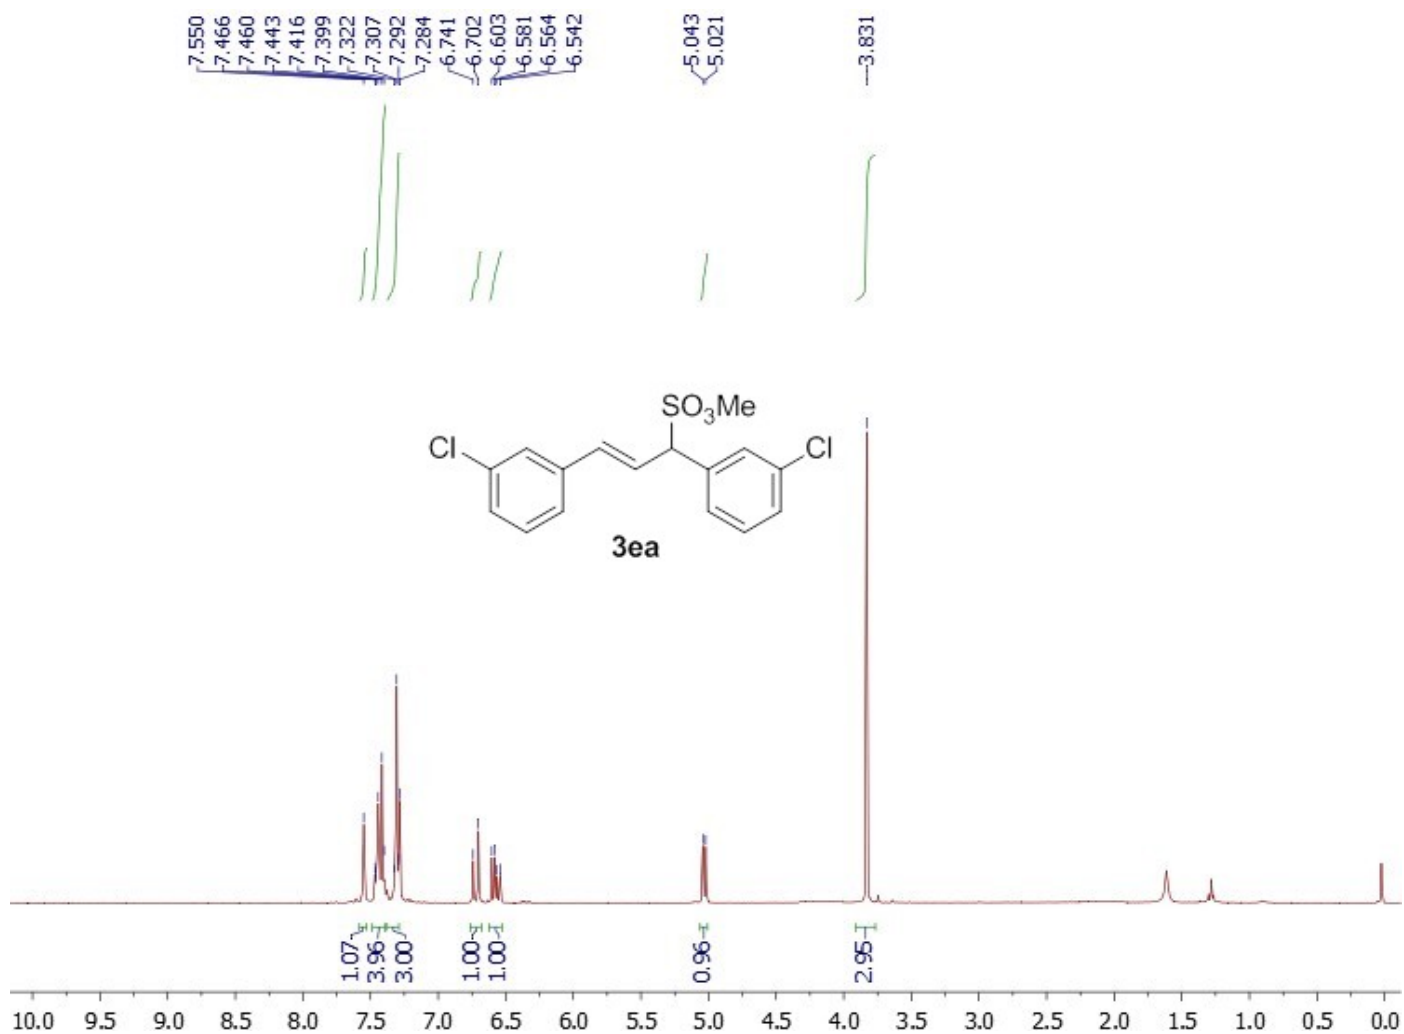

137.141  
136.585  
135.024  
134.806  
134.213  
130.369  
130.020  
129.584  
129.356  
128.849  
127.458  
126.785  
125.156  
121.423

--69.882

--57.487

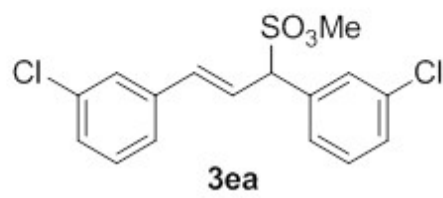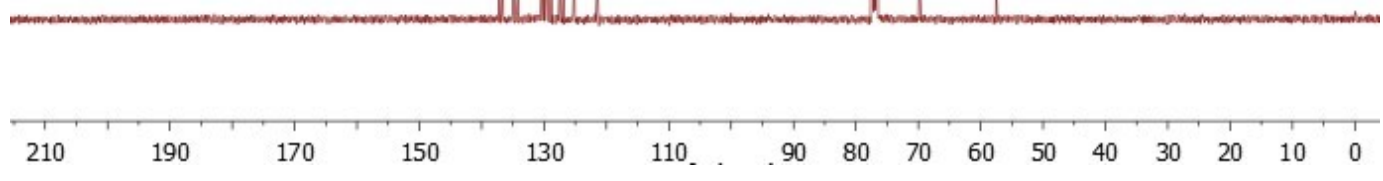

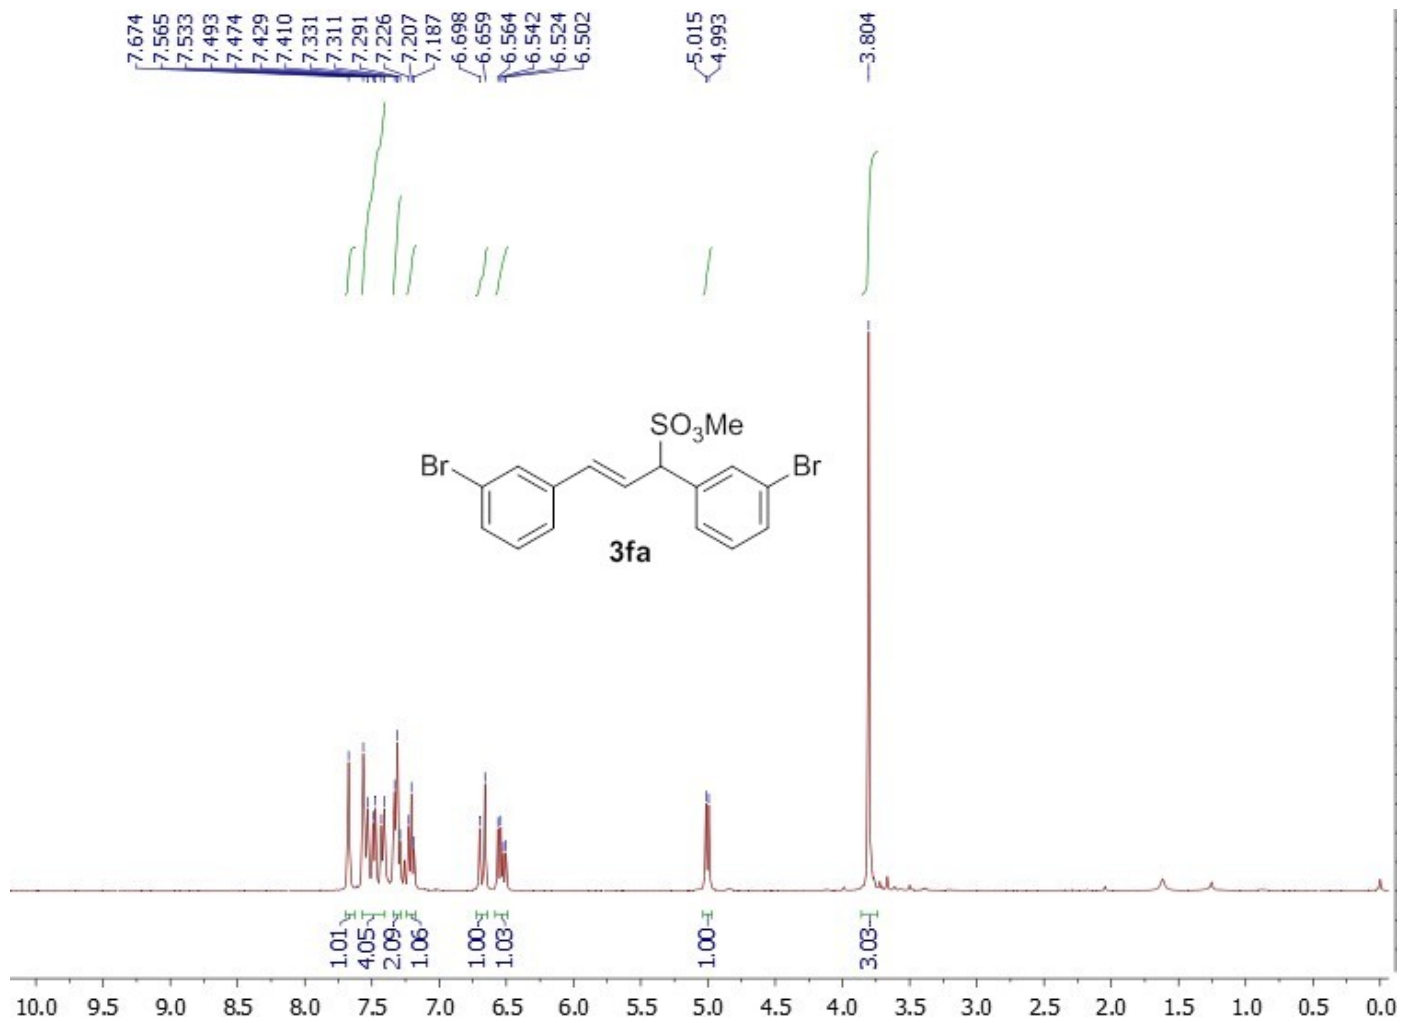

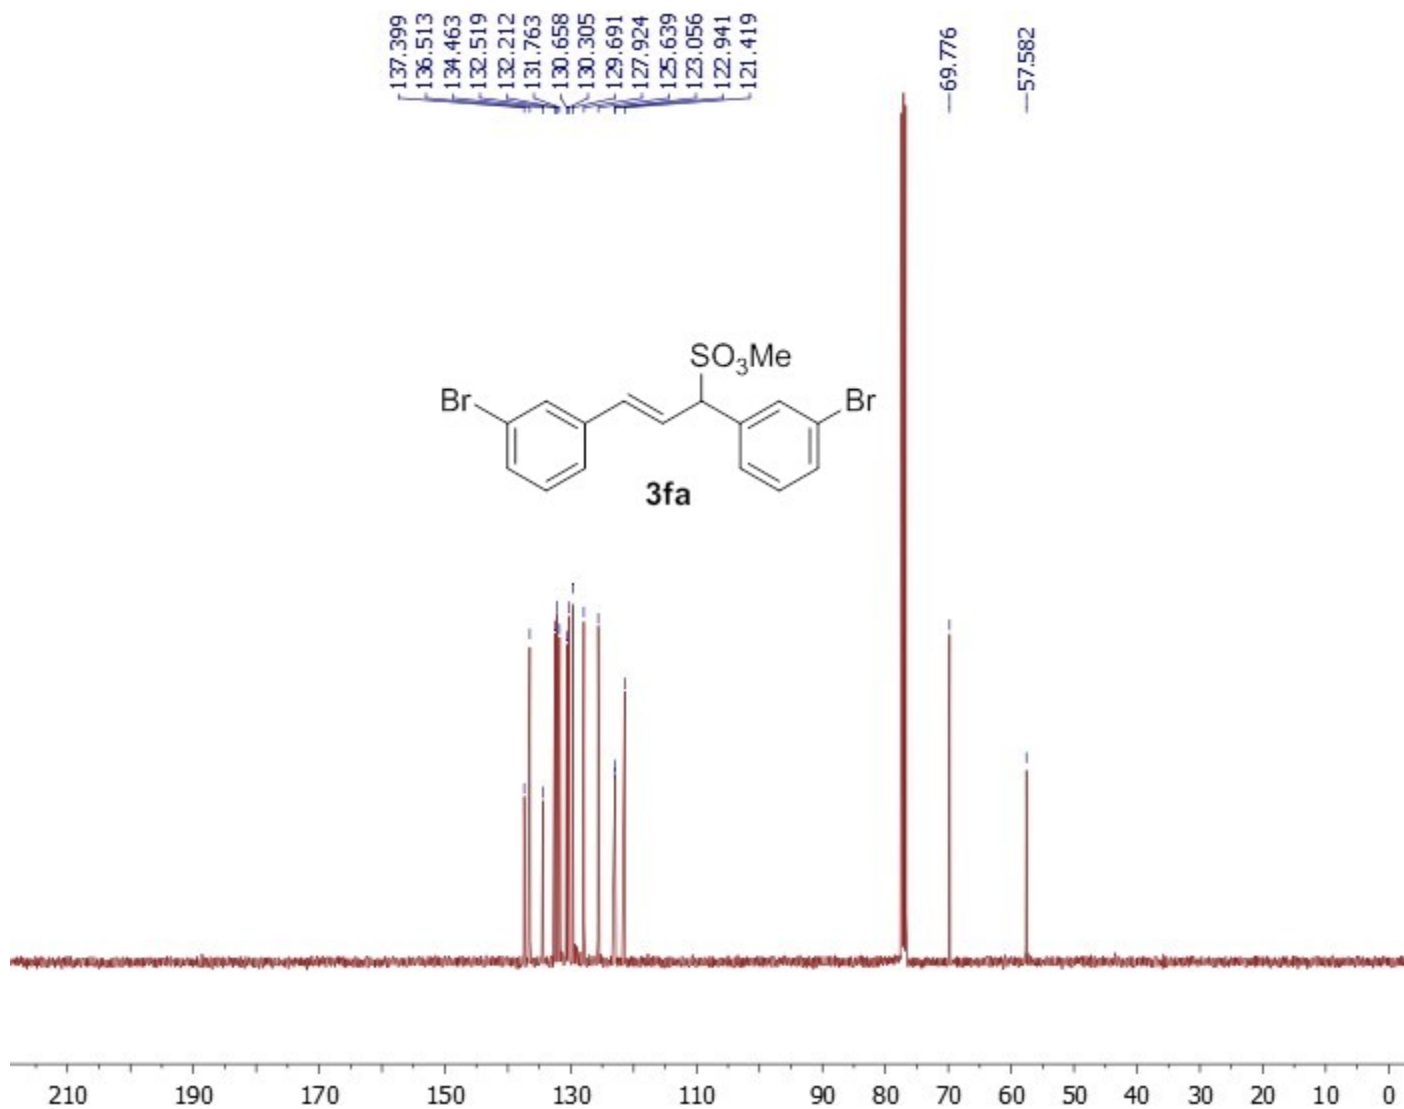

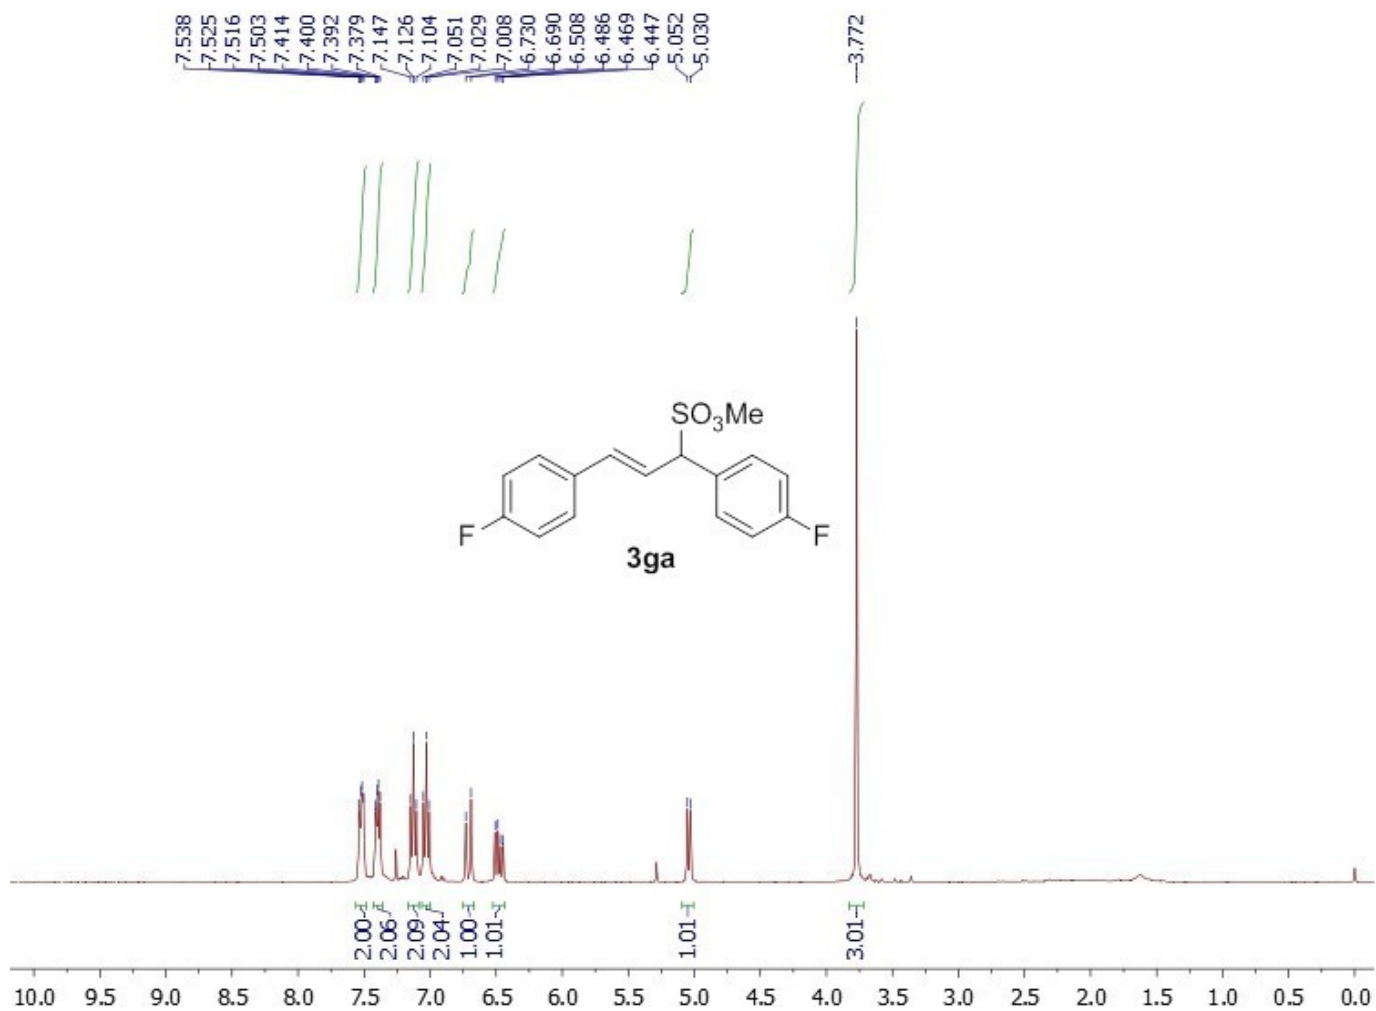

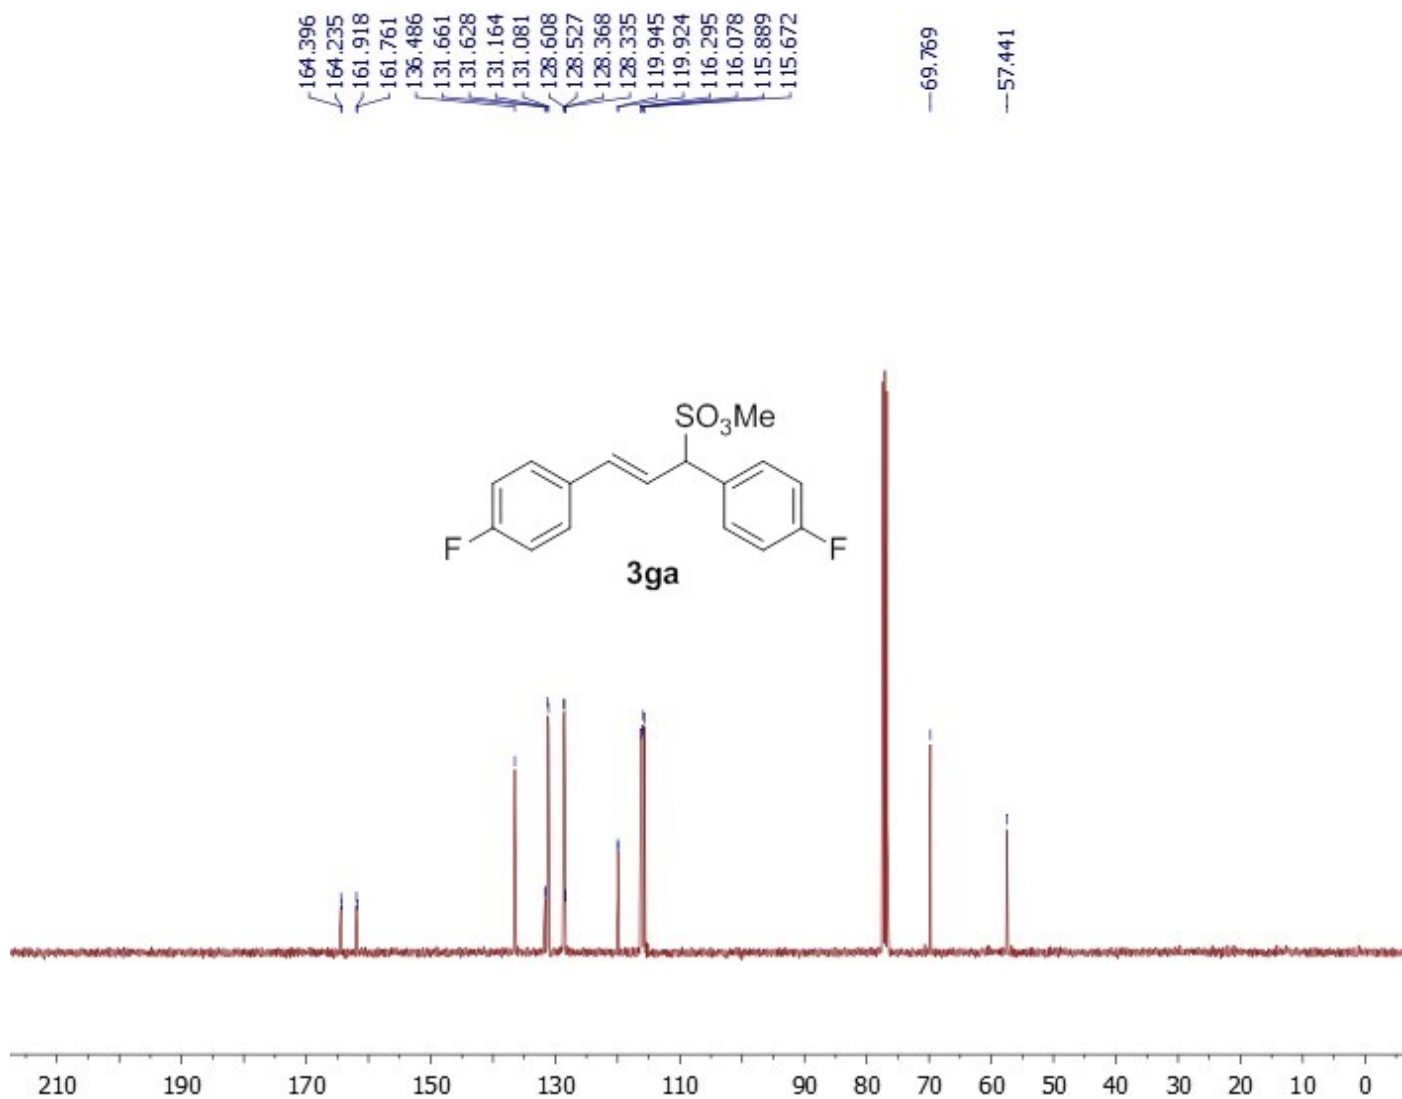

-111.660  
-112.248

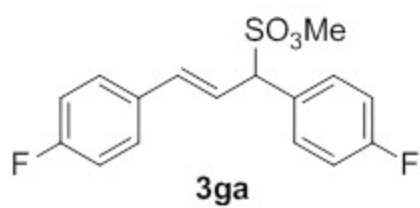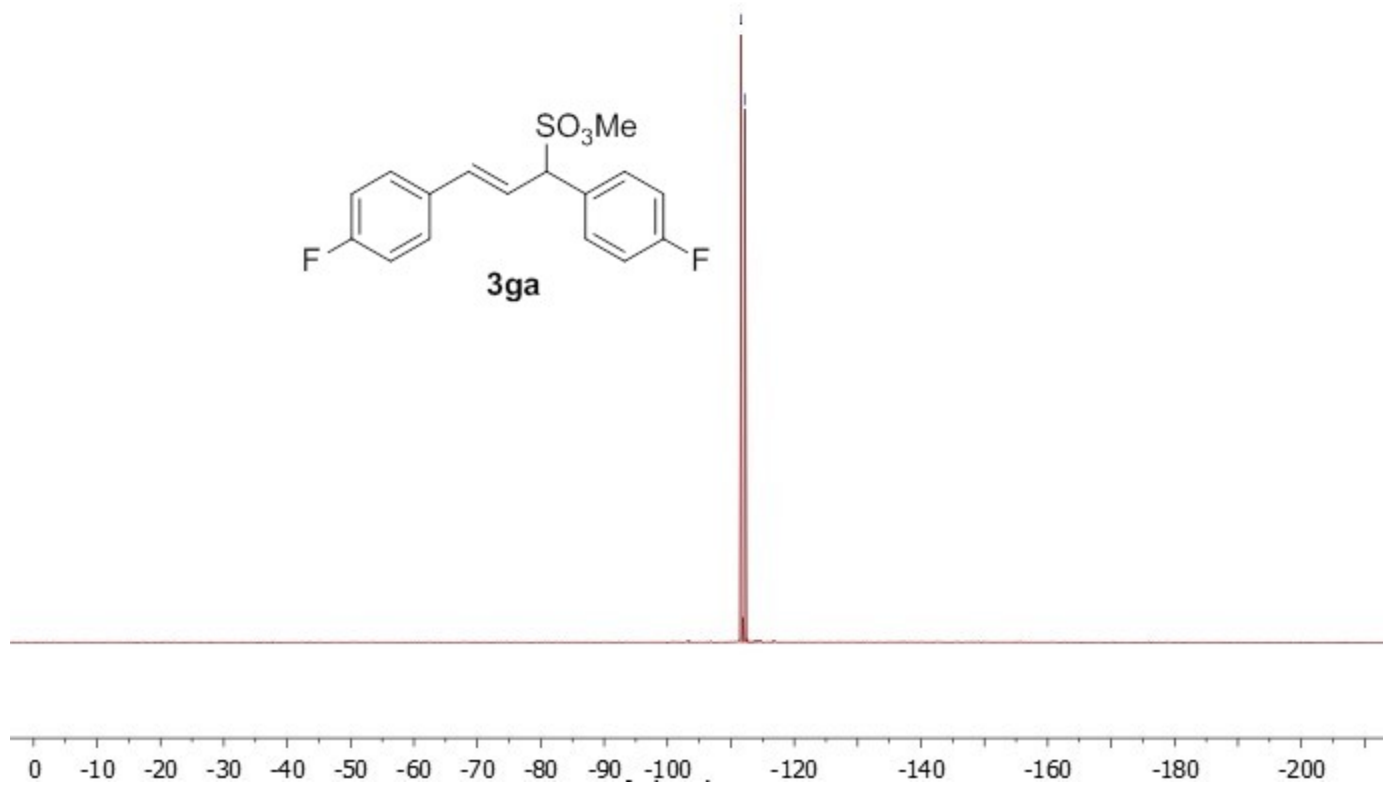



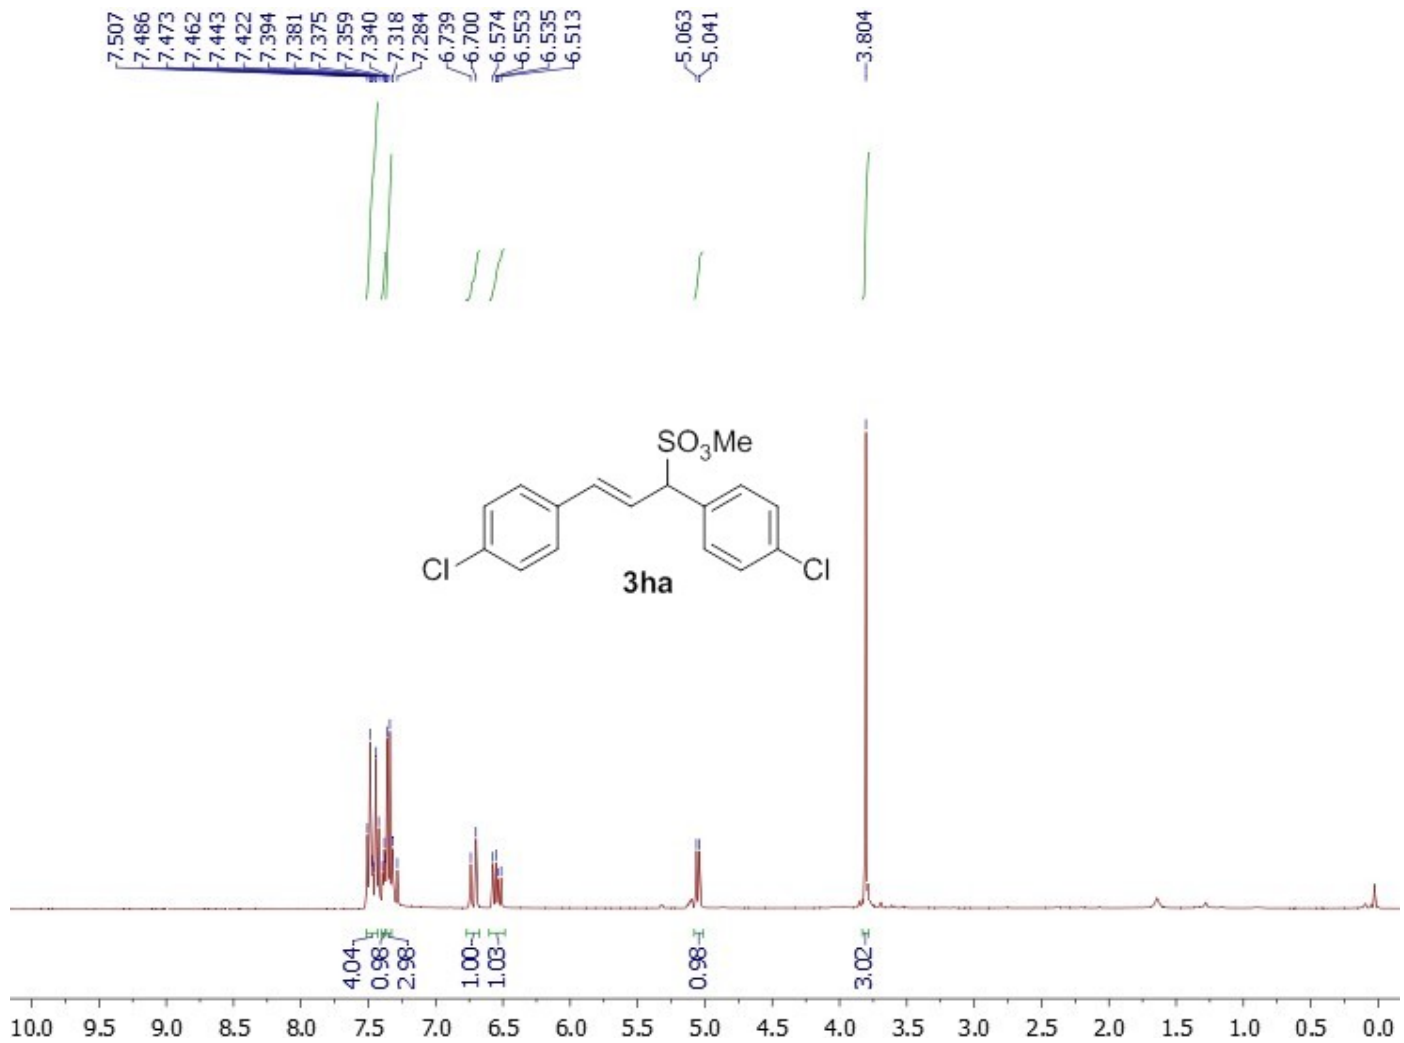

136.582  
135.479  
134.646  
133.872  
130.874  
130.800  
130.621  
129.559  
129.378  
129.251  
128.983  
128.101  
120.602

—69.810

—57.468

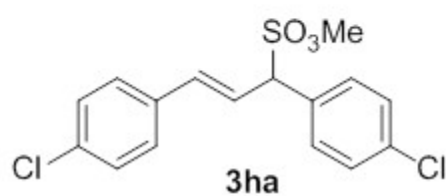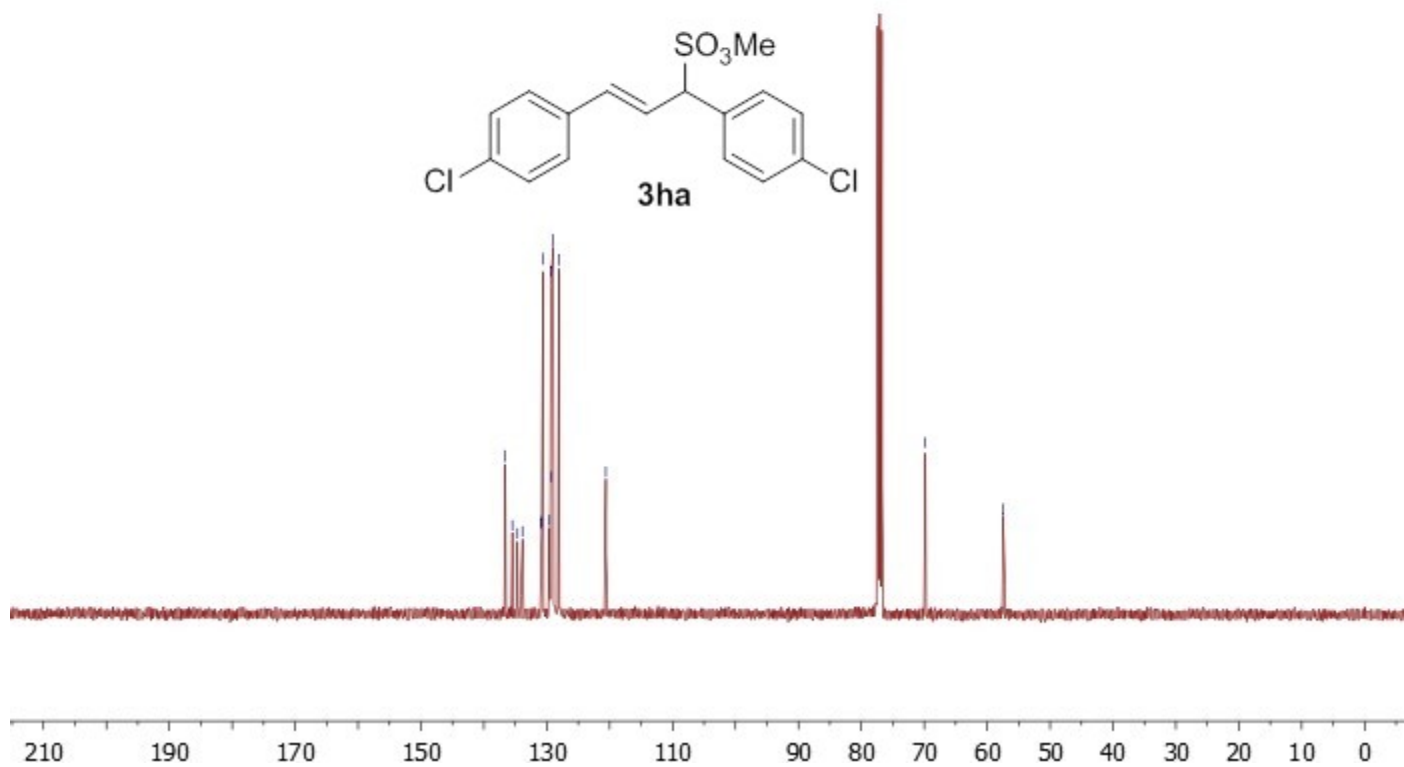

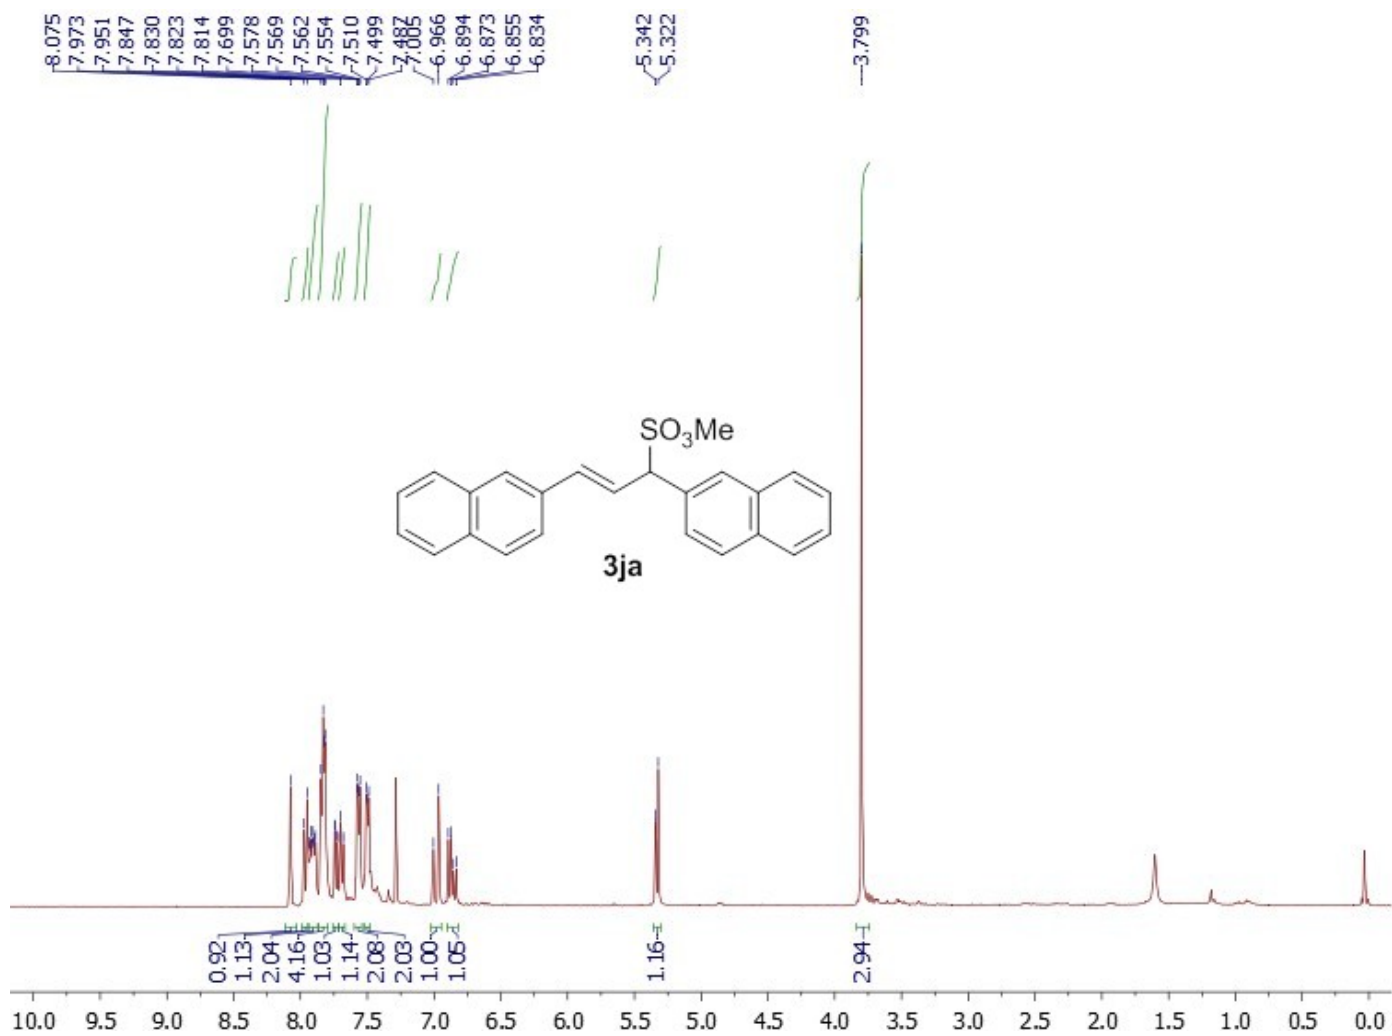

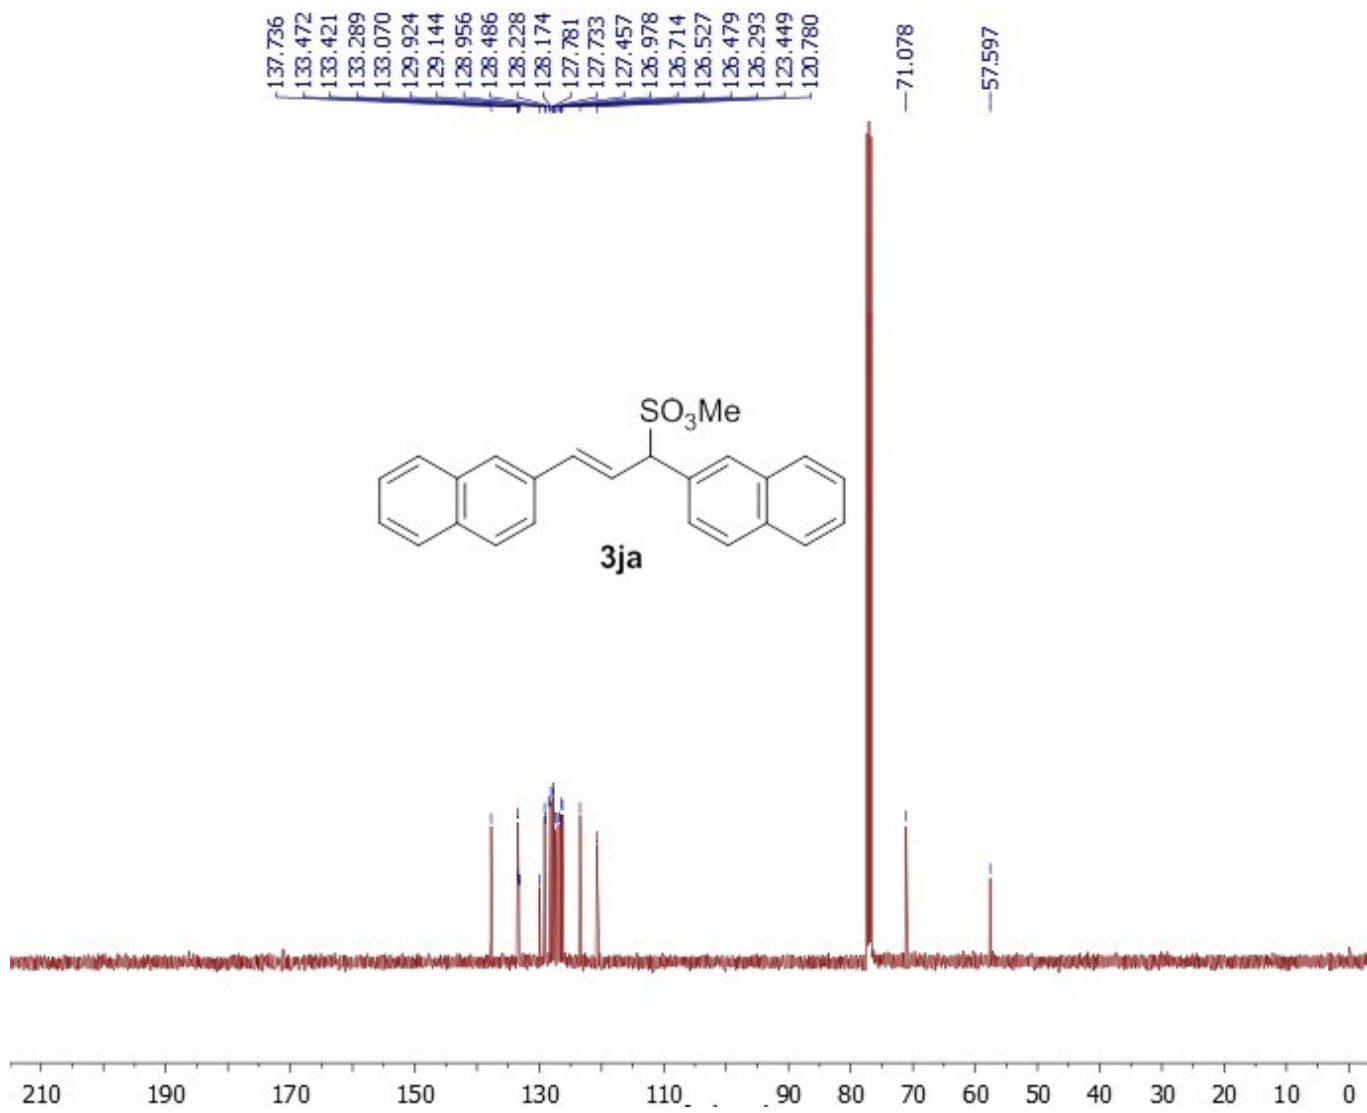

## HPLC Chromatograms

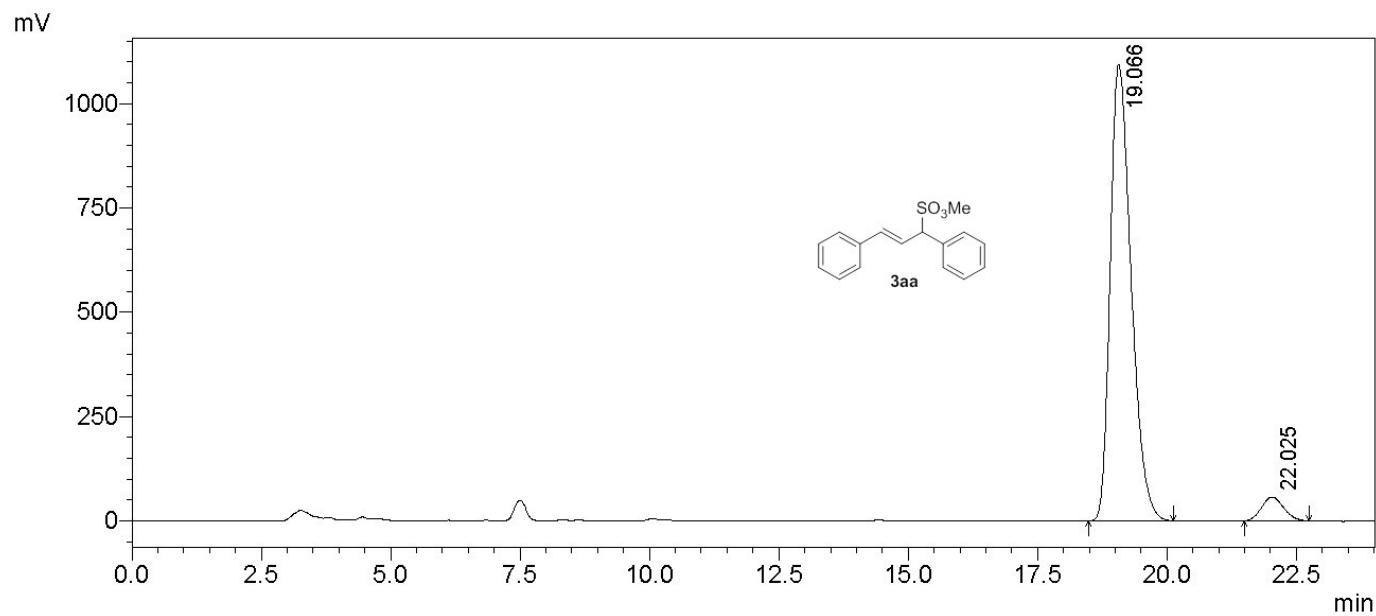

Ch1 254nm

| Peak# | R.Time | Area     | Height  | Conc.% |
|-------|--------|----------|---------|--------|
| 1     | 19.064 | 30828648 | 1107387 | 94.837 |
| 2     | 22.023 | 1678460  | 55778   | 5.163  |

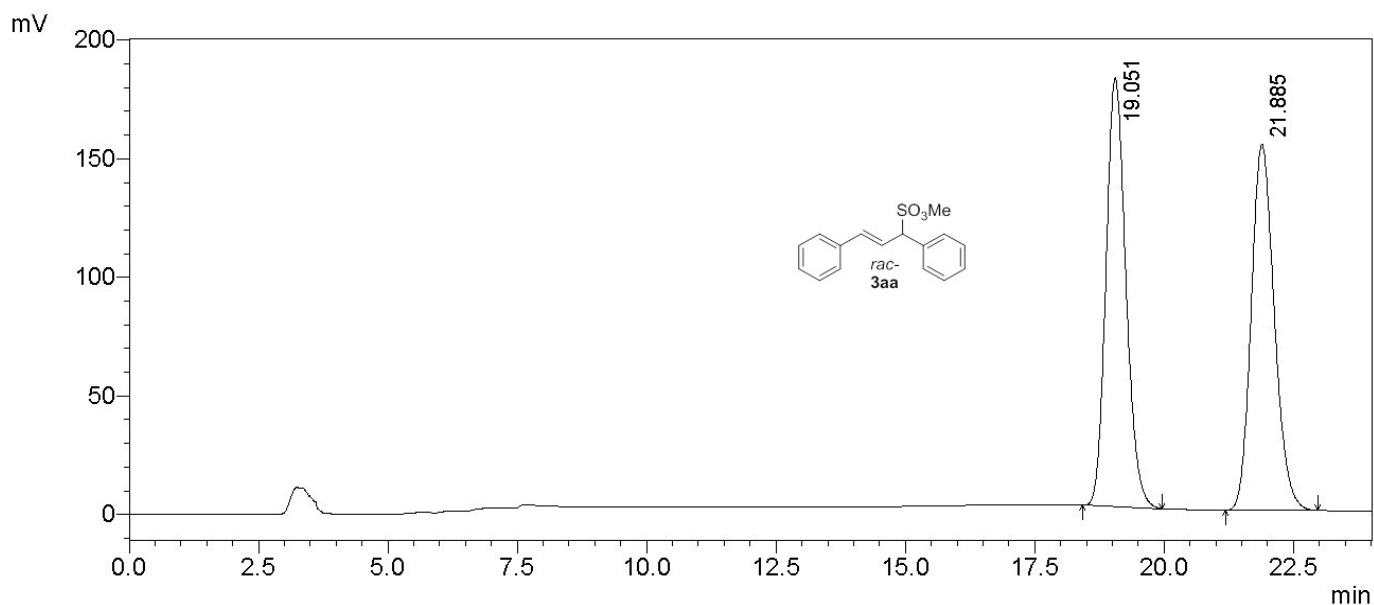

Ch1 254nm

| Peak# | R.Time | Area    | Height | Conc.% |
|-------|--------|---------|--------|--------|
| 1     | 19.051 | 4837571 | 180731 | 50.231 |
| 2     | 21.885 | 4793150 | 154476 | 49.769 |

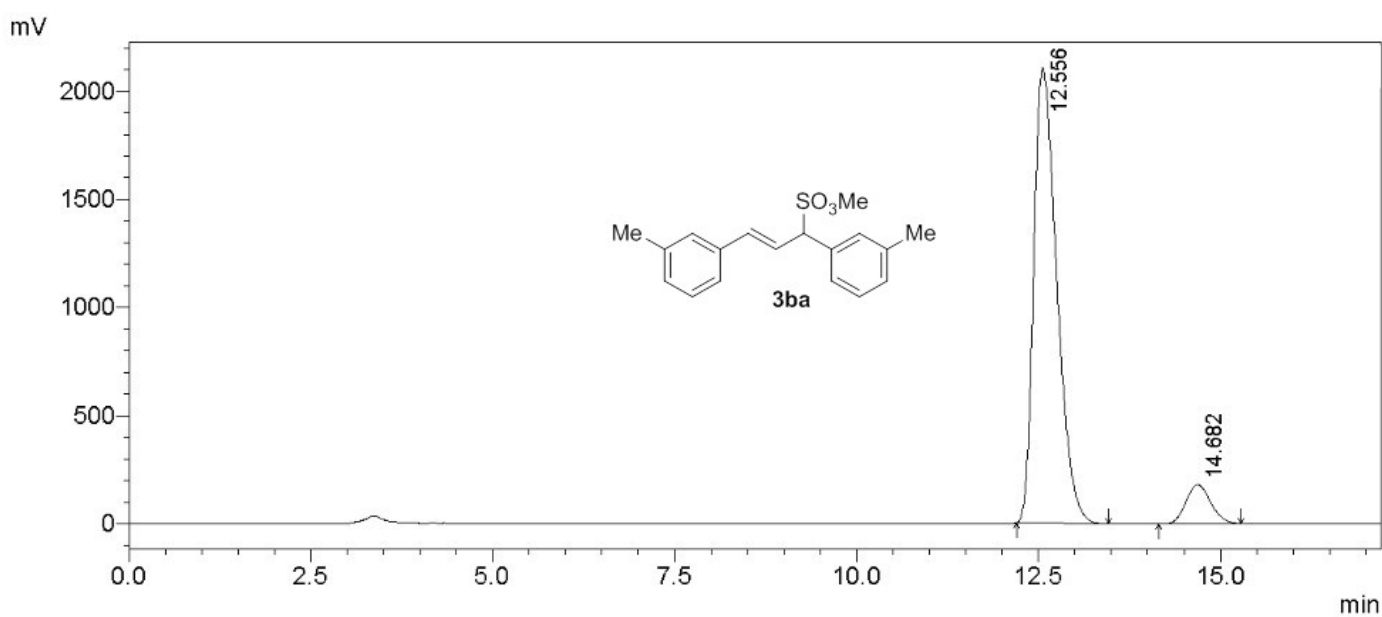

Ch1 254nm

| Peak# | R.Time | Area     | Height  | Conc.% |
|-------|--------|----------|---------|--------|
| 1     | 12.556 | 46388284 | 2103829 | 91.460 |
| 2     | 14.682 | 4331489  | 181747  | 8.540  |

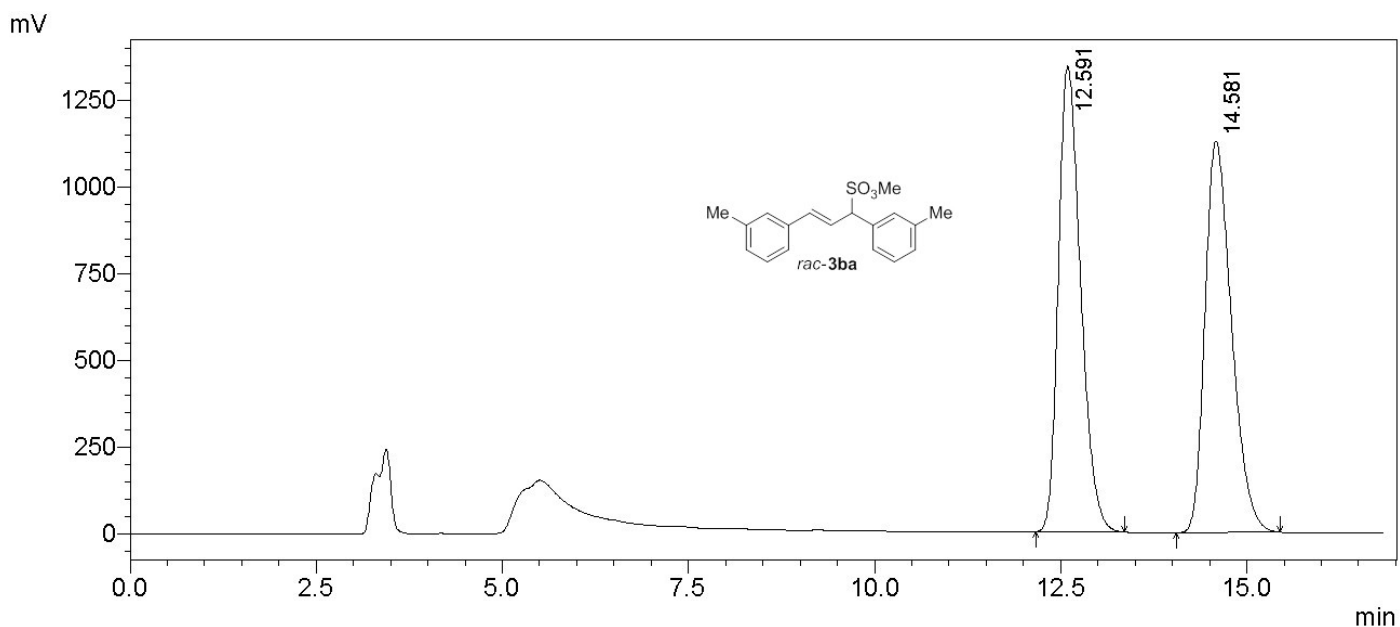

Ch1 254nm

| Peak# | R.Time | Area     | Height  | Conc.% |
|-------|--------|----------|---------|--------|
| 1     | 12.591 | 27976500 | 1340782 | 49.987 |
| 2     | 14.581 | 27991555 | 1126834 | 50.013 |

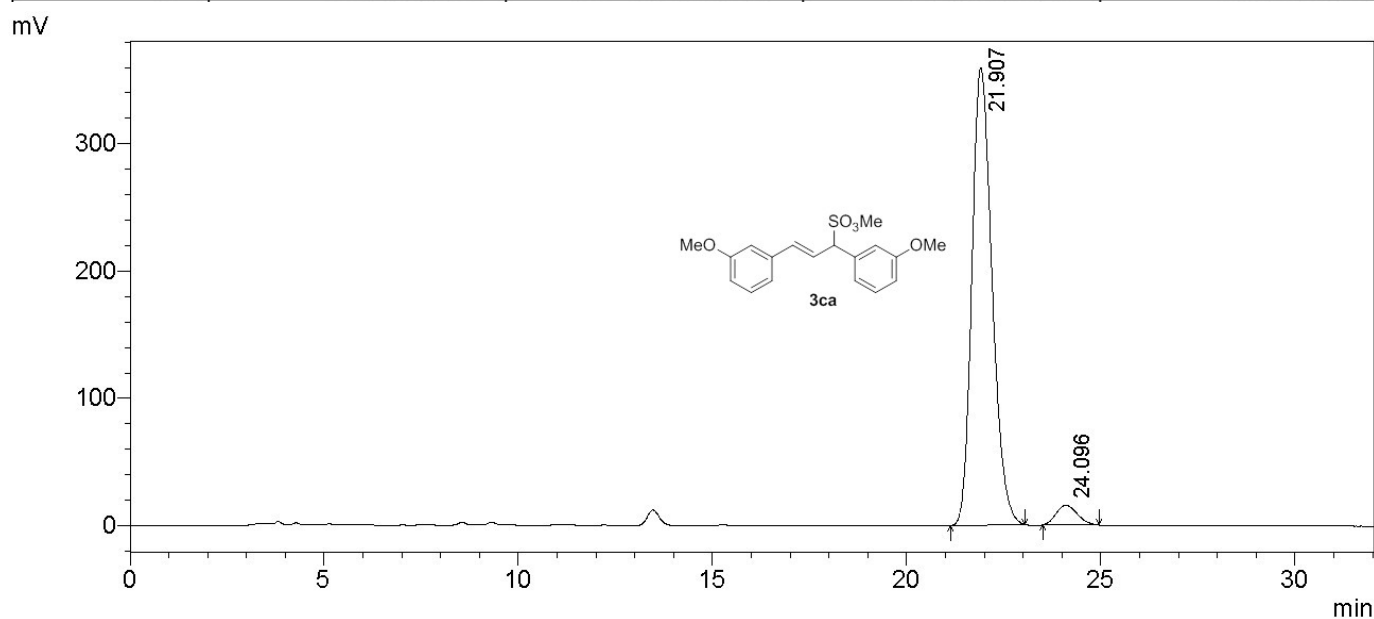

Ch1 254nm

| Peak# | R.Time | Area     | Height | Conc.% |
|-------|--------|----------|--------|--------|
| 1     | 21.907 | 12973251 | 359582 | 95.653 |
| 2     | 24.096 | 589520   | 15562  | 4.347  |

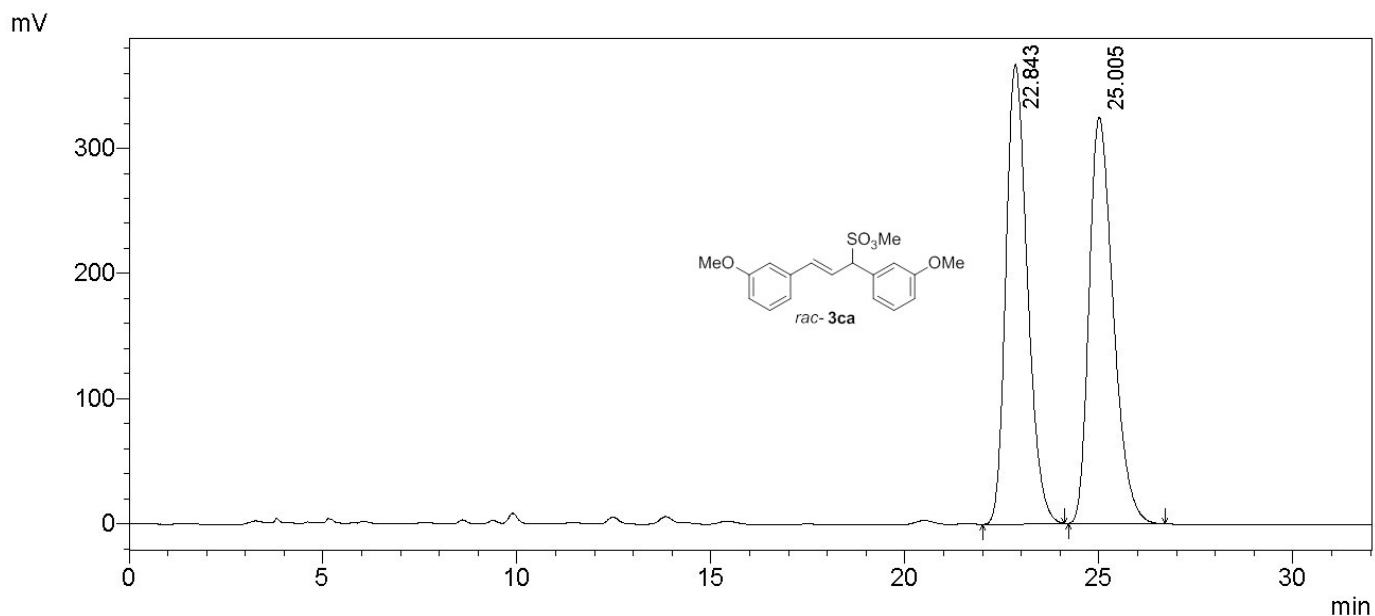

Ch1 254nm

| Peak# | R.Time | Area     | Height | Conc.% |
|-------|--------|----------|--------|--------|
| 1     | 22.843 | 14148508 | 367192 | 50.111 |
| 2     | 25.005 | 14085799 | 324738 | 49.889 |

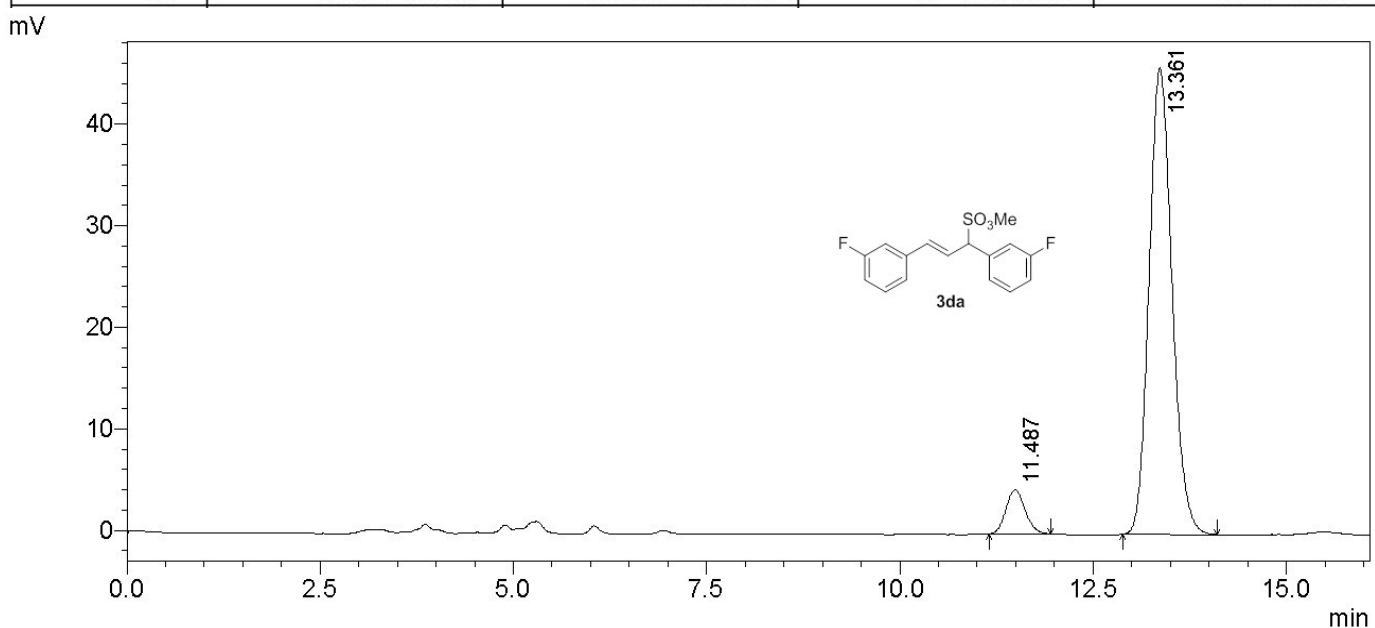

Ch1 254nm

| Peak# | R.Time | Area   | Height | Conc.% |
|-------|--------|--------|--------|--------|
| 1     | 11.487 | 75027  | 4336   | 7.338  |
| 2     | 13.361 | 947426 | 45903  | 92.662 |



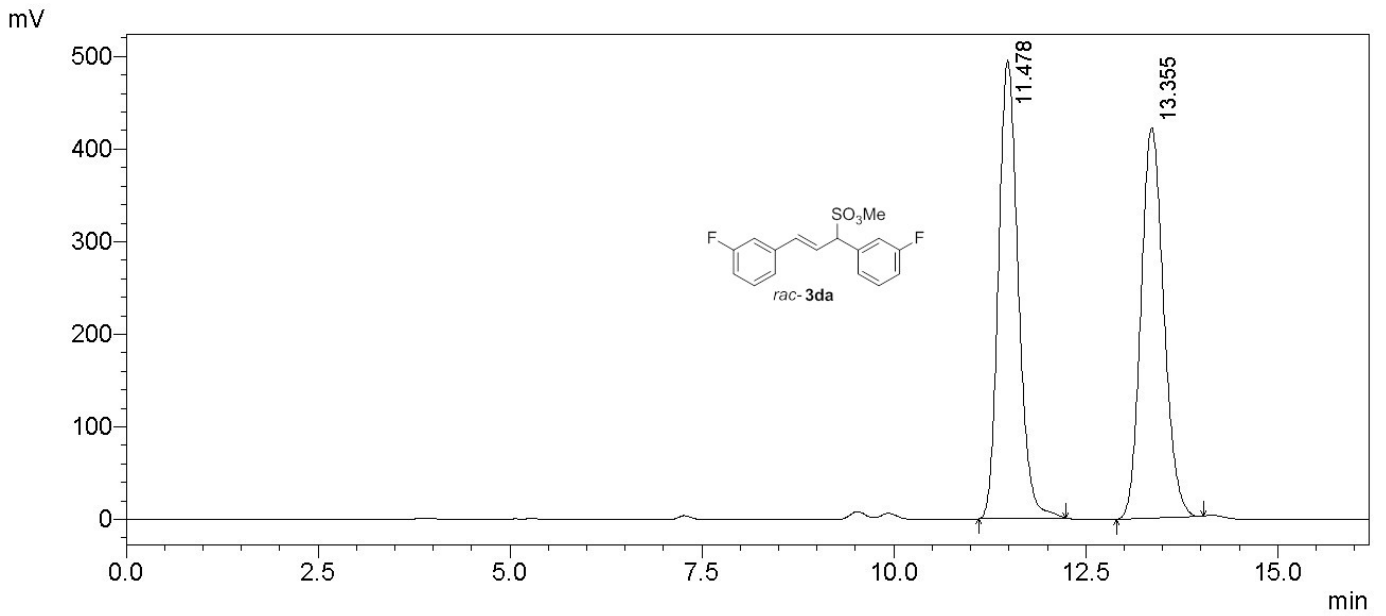

Ch1 254nm

| Peak# | R.Time | Area    | Height | Conc.% |
|-------|--------|---------|--------|--------|
| 1     | 11.478 | 8822139 | 494831 | 50.417 |
| 2     | 13.355 | 8676344 | 421429 | 49.583 |

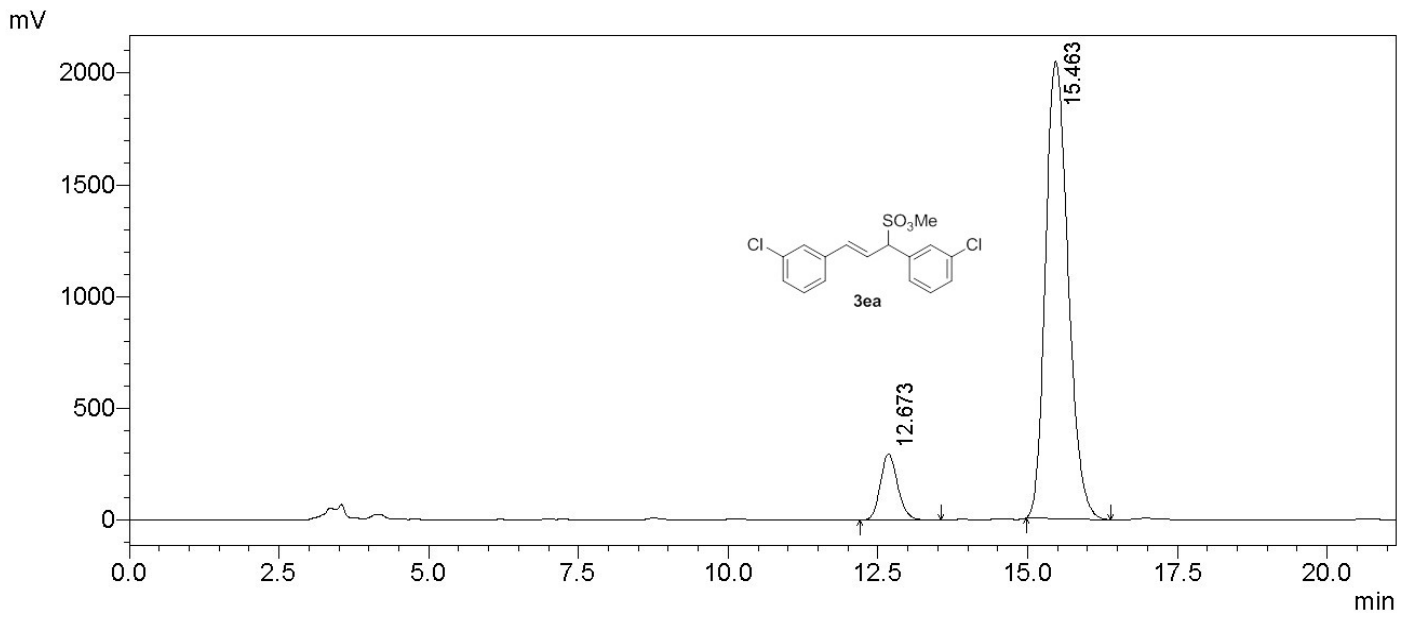

Ch1 254nm

| Peak# | R.Time | Area     | Height  | Conc.% |
|-------|--------|----------|---------|--------|
| 1     | 12.672 | 3457952  | 171066  | 9.701  |
| 2     | 15.461 | 32187602 | 1258026 | 90.299 |

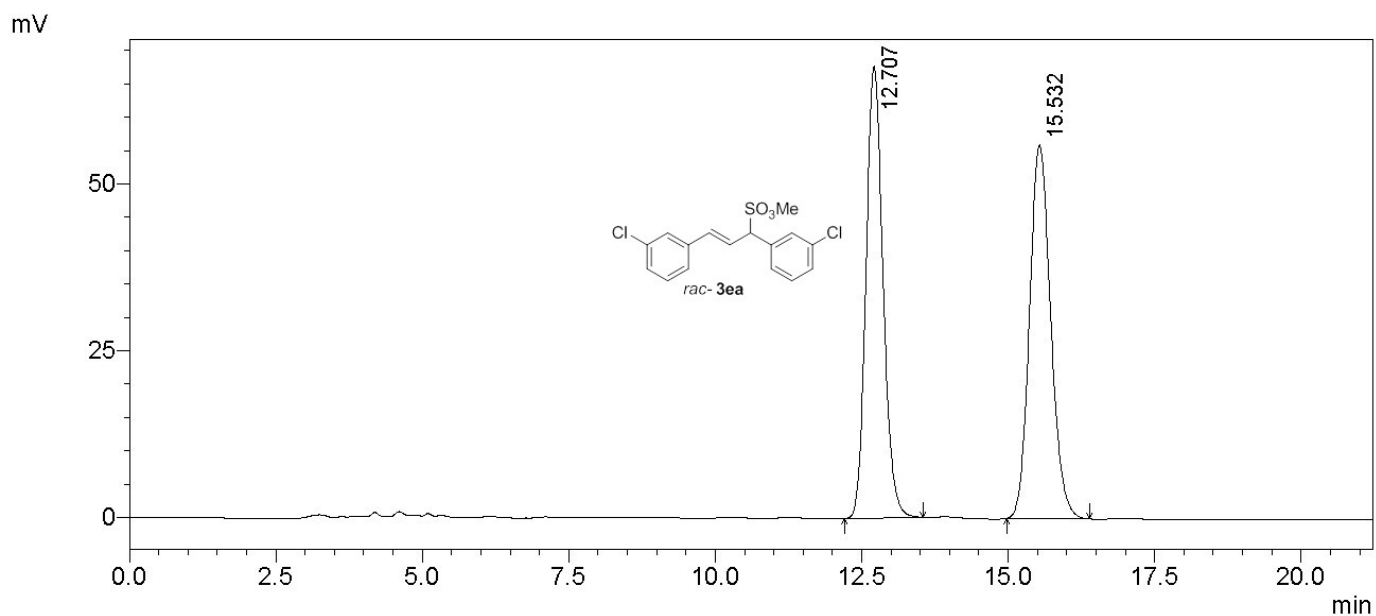

Ch1 254nm

| Peak# | R.Time | Area    | Height | Conc.% |
|-------|--------|---------|--------|--------|
| 1     | 12.707 | 1370937 | 67832  | 49.325 |
| 2     | 15.532 | 1408480 | 56066  | 50.675 |

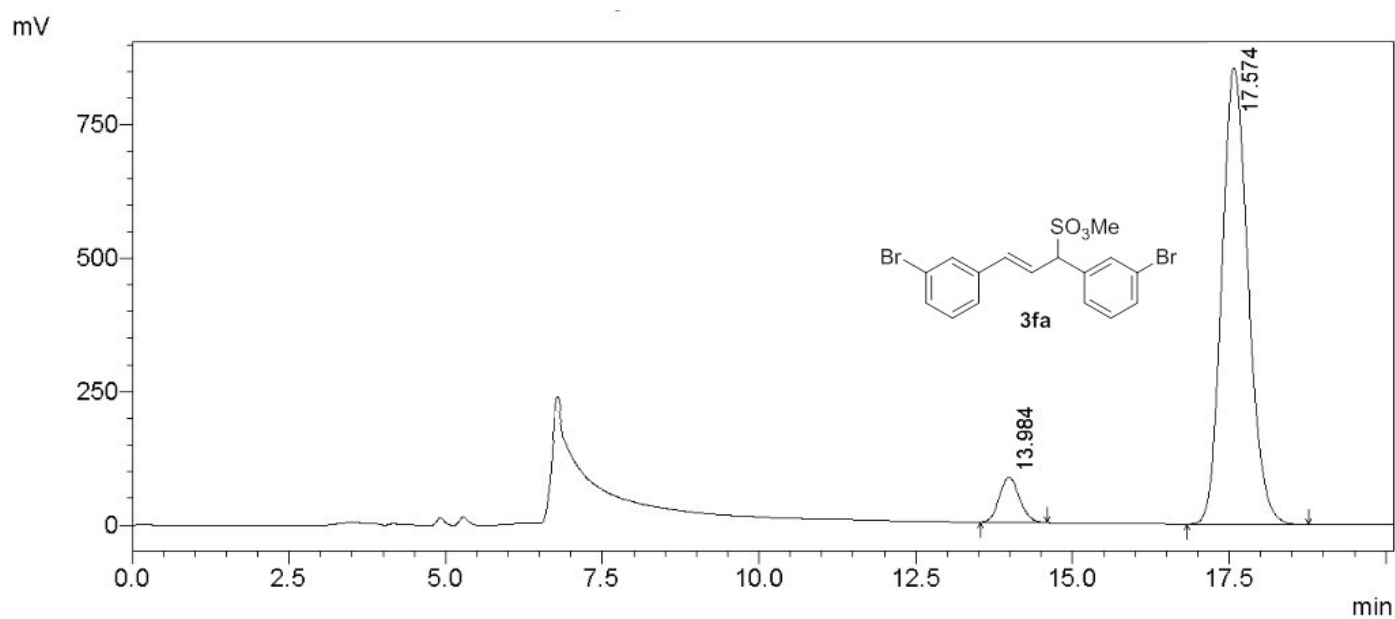

Ch1 254nm

| Peak# | R.Time | Area     | Height | Conc.% |
|-------|--------|----------|--------|--------|
| 1     | 13.984 | 1886598  | 84400  | 7.007  |
| 2     | 17.574 | 25036566 | 855459 | 92.993 |

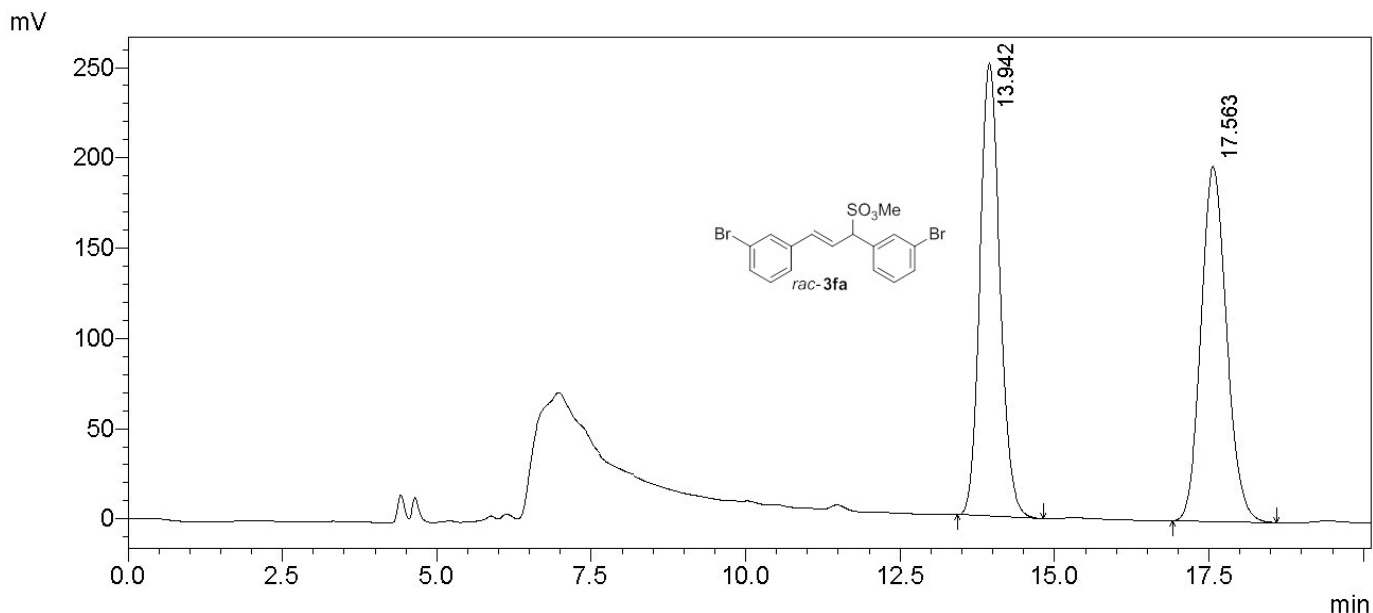

Ch1 254nm

| Peak# | R.Time | Area    | Height | Conc.% |
|-------|--------|---------|--------|--------|
| 1     | 13.942 | 5643868 | 250839 | 49.874 |
| 2     | 17.563 | 5672338 | 196607 | 50.126 |

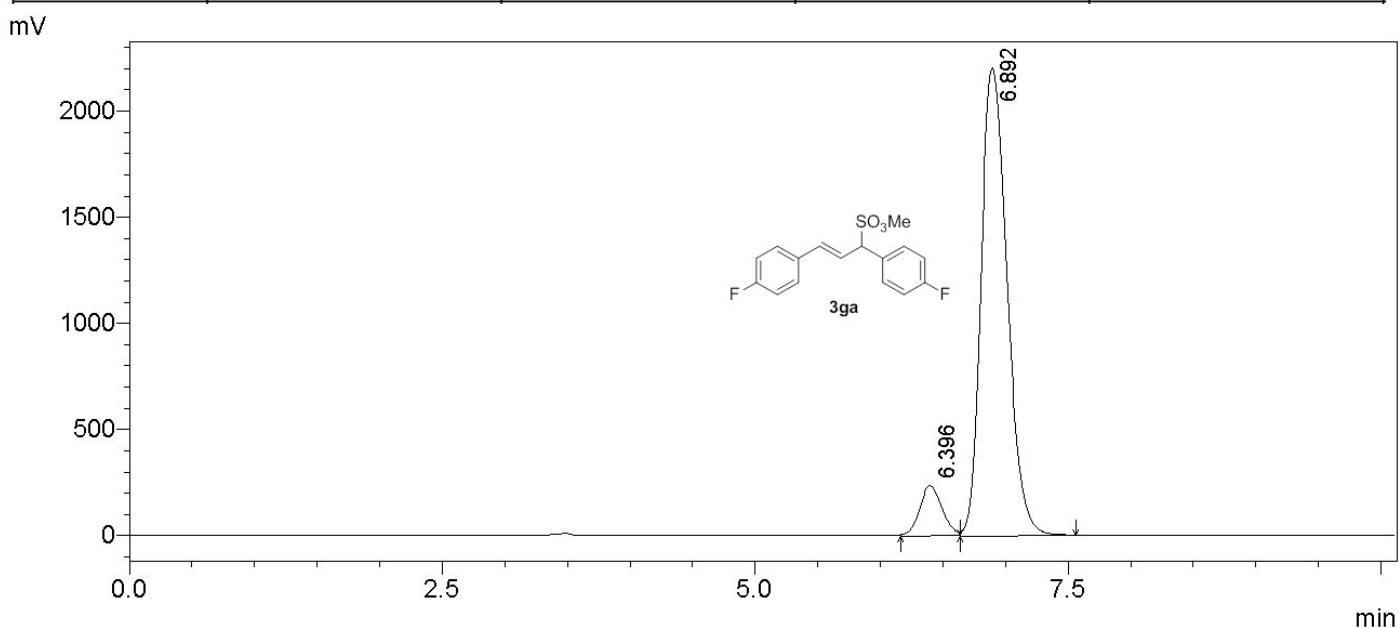

Ch1 254nm

| Peak# | R.Time | Area     | Height  | Conc.% |
|-------|--------|----------|---------|--------|
| 1     | 6.396  | 2963845  | 235886  | 8.508  |
| 2     | 6.892  | 31871625 | 2201034 | 91.492 |

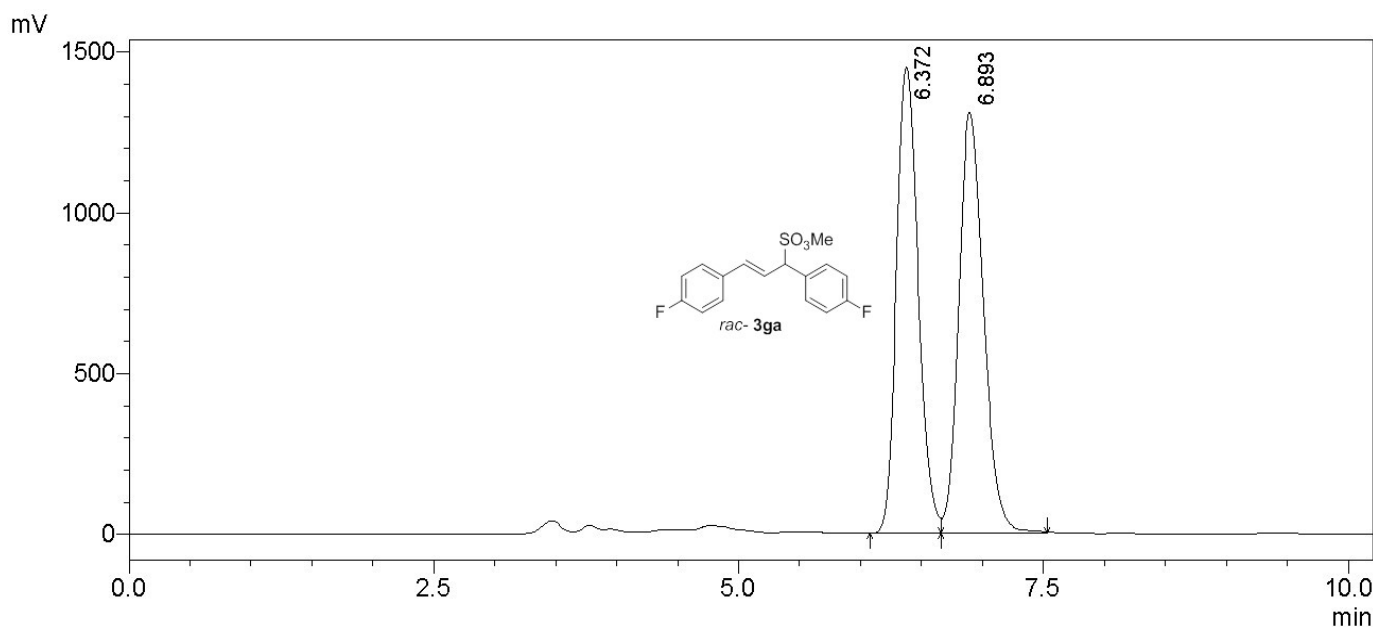

Ch1 254nm

| Peak# | R.Time | Area     | Height  | Conc.% |
|-------|--------|----------|---------|--------|
| 1     | 6.372  | 17950835 | 1450828 | 49.275 |
| 2     | 6.893  | 18479010 | 1308786 | 50.725 |

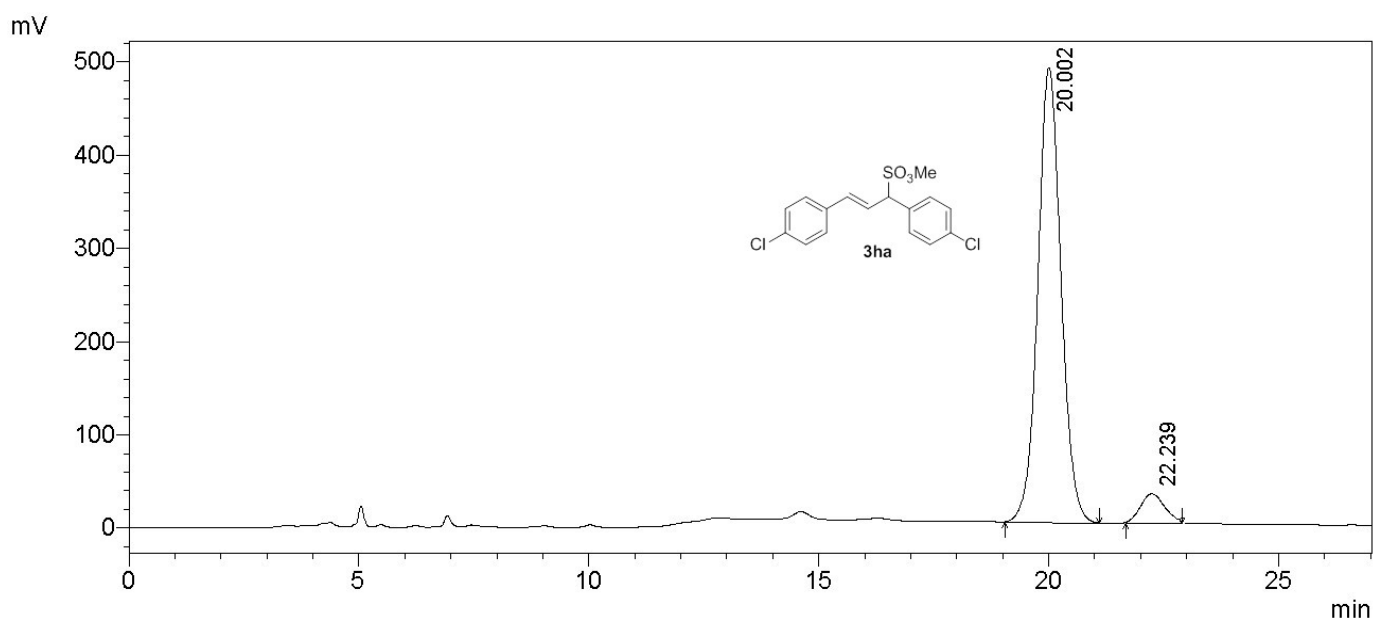

Ch1 254nm

| Peak# | R.Time | Area     | Height | Conc.% |
|-------|--------|----------|--------|--------|
| 1     | 20.002 | 17089598 | 487885 | 93.366 |
| 2     | 22.239 | 1214347  | 31891  | 6.634  |

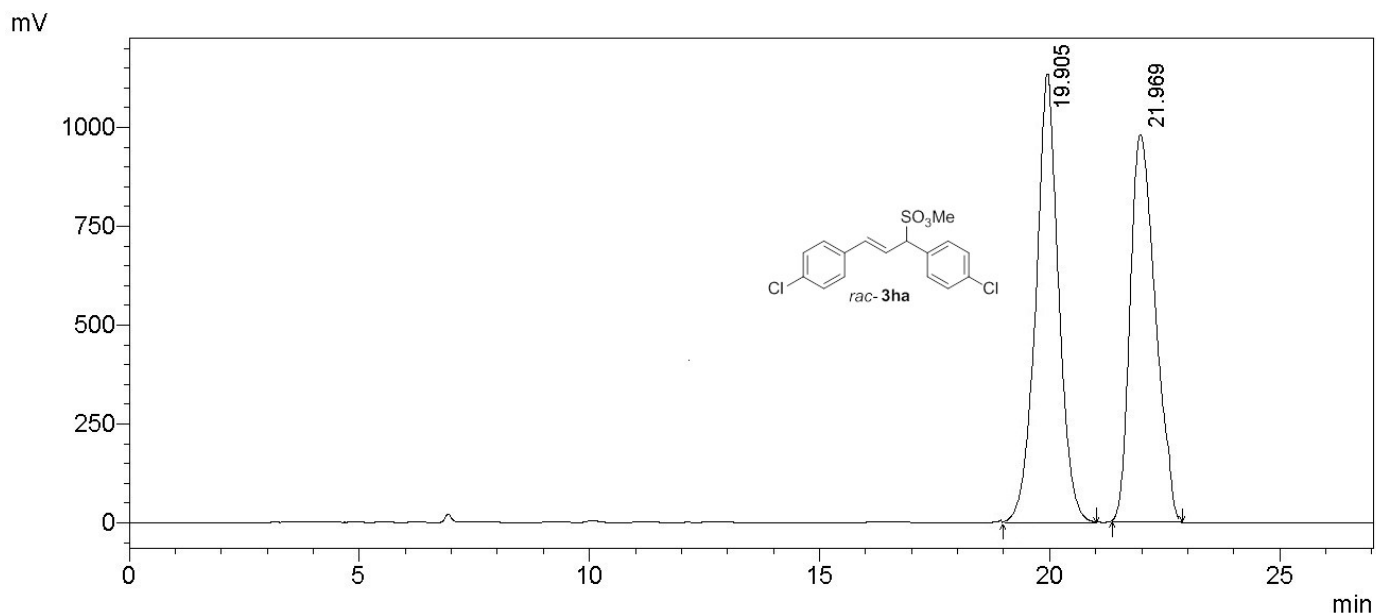

Ch1 254nm

| Peak# | R.Time | Area     | Height  | Conc.% |
|-------|--------|----------|---------|--------|
| 1     | 19.905 | 42138121 | 1158825 | 50.290 |
| 2     | 21.969 | 41651323 | 979151  | 49.710 |

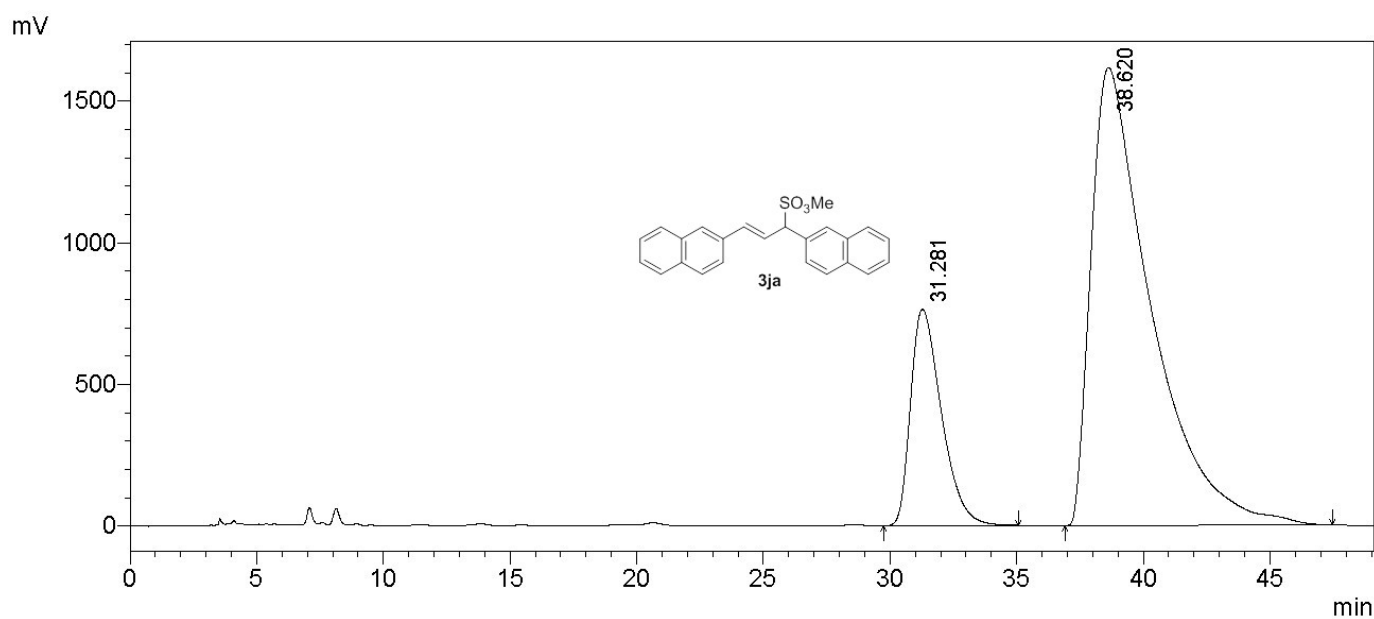

Ch1 254nm

| Peak# | R.Time | Area      | Height  | Conc.% |
|-------|--------|-----------|---------|--------|
| 1     | 31.281 | 64603677  | 763115  | 19.604 |
| 2     | 38.620 | 264942984 | 1616131 | 80.396 |

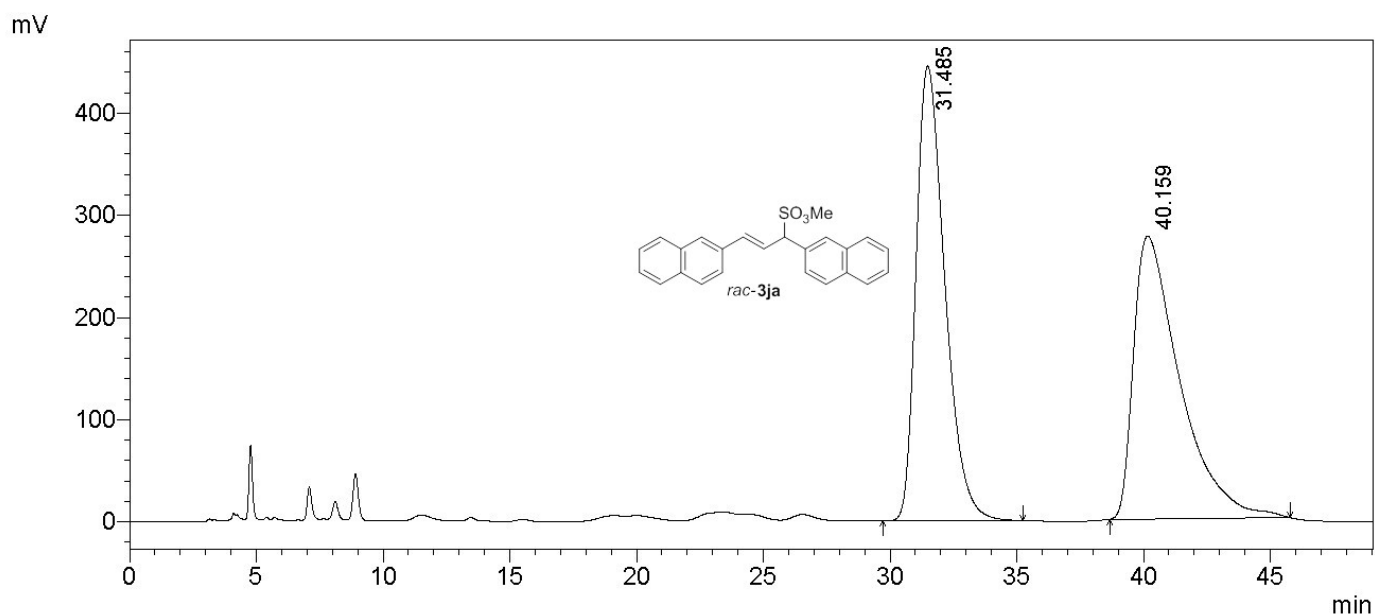

Ch1 254nm

| Peak# | R. Time | Area     | Height | Conc. % |
|-------|---------|----------|--------|---------|
| 1     | 31.485  | 35055340 | 445168 | 49.949  |
| 2     | 40.159  | 35127491 | 276988 | 50.051  |

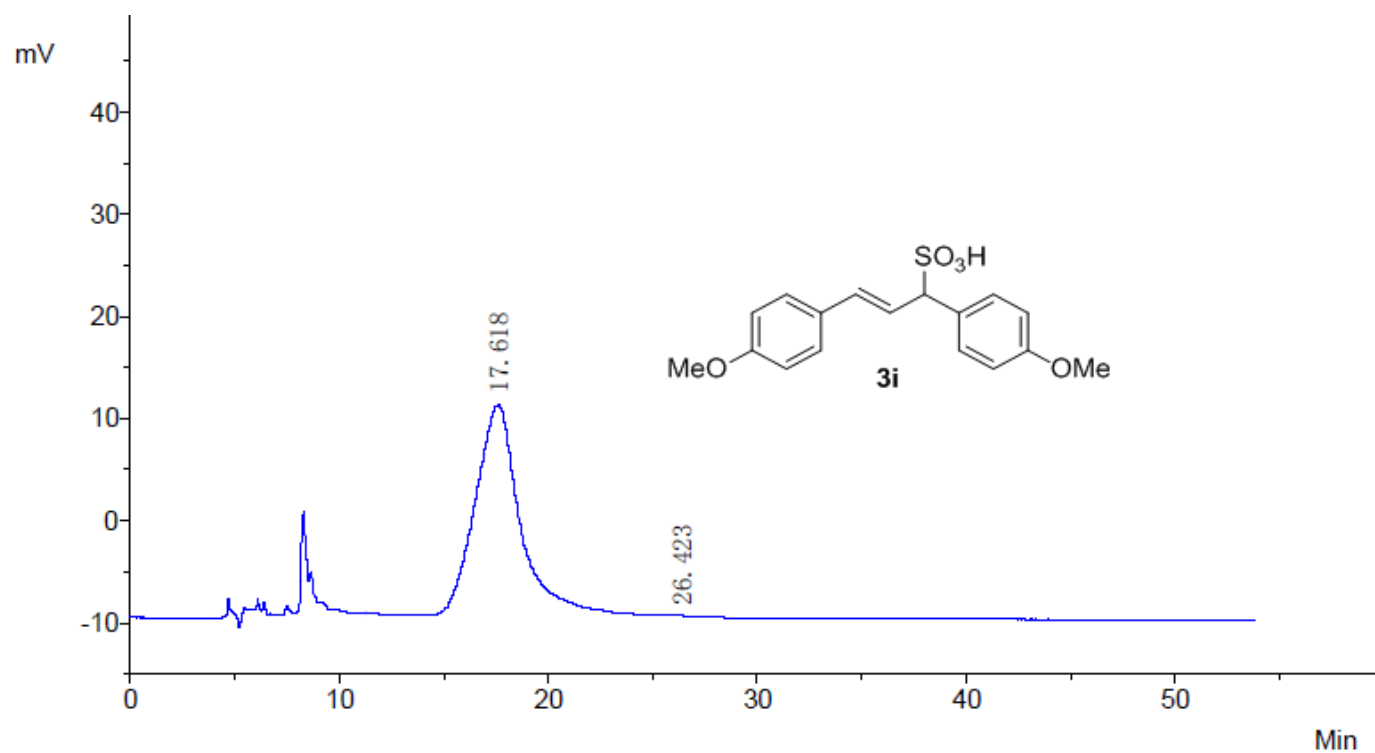

| Peak# | R. Time | Area    | Height    | Conc. % |
|-------|---------|---------|-----------|---------|
| 1     | 17.618  | 20808.8 | 3184771.5 | 98.9026 |
| 2     | 26.423  | 128.8   | 35336.1   | 1.0974  |

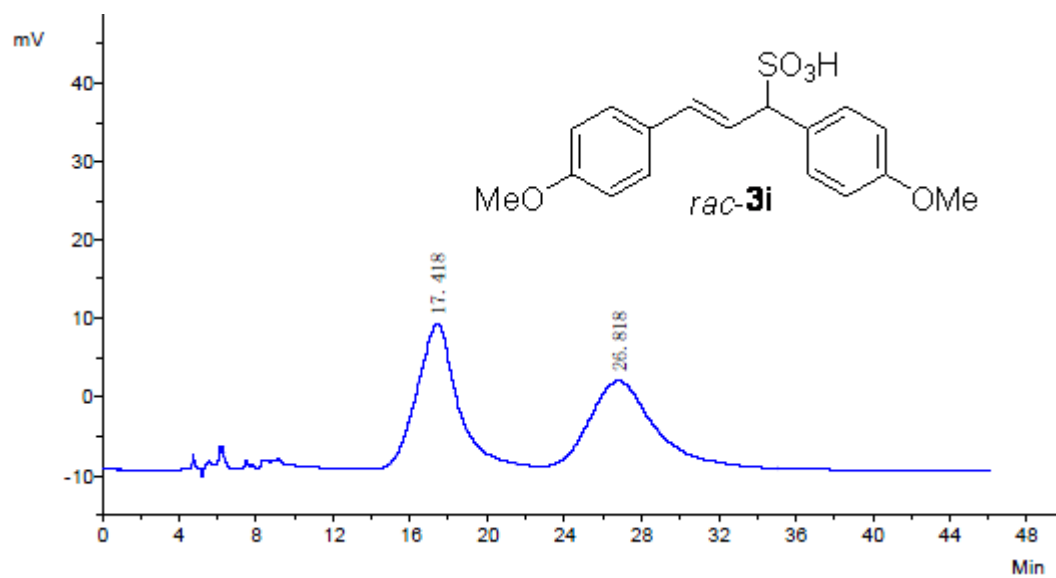

| Peak# | R. Time | Area    | Height    | Conc. % |
|-------|---------|---------|-----------|---------|
| 1     | 17.418  | 18385.6 | 2656366.0 | 50.6169 |
| 2     | 26.818  | 10987.6 | 2591617.9 | 49.3831 |
